# Supplementary material for: Photocatalyst-, metal- and additive-free, direct C–H arylation of quinoxalin-2(1H)-ones with aryl acyl peroxides induced by visible light
Source: Royal Society of Chemistry journal article supplement (doi:10.1039/d0qo00872a), 2020-01-01

# Photocatalyst-, metal- and additive- free, direct C-H arylation of quinoxalin-2(1*H*)-ones with aryl acyl peroxides induced by visible light †

Jun Xu,<sup>a,‡</sup> Hongdou Zhang,<sup>a,‡</sup> Jianming Zhao,<sup>a</sup> Zhigang Ni,<sup>a</sup> Pengfei Zhang,<sup>a</sup>  
Bing-Feng Shi,<sup>b</sup> and Wanmei Li<sup>a,\*</sup>

<sup>a</sup> College of Material, Chemistry and Chemical Engineering, Hangzhou Normal University, Hangzhou 311121, China. E-mail: liwanmei@hznu.edu.cn

<sup>b</sup> Department of Chemistry, Zhejiang University, Hangzhou, 310027, China

‡ Jun Xu and Hongdou Zhang contributed equally.

## Supporting Information

### Table of contents

|                                      |    |
|--------------------------------------|----|
| 1. Ineffective transformations       | 2  |
| 2. Fluorescence quenching experiment | 2  |
| 3. Computational details             | 3  |
| 4. References                        | 10 |
| 5. Copies of NMR spectra             | 11 |
| 6. GC-MS spectra of benzoic acid     | 53 |

## 1. Ineffective transformations

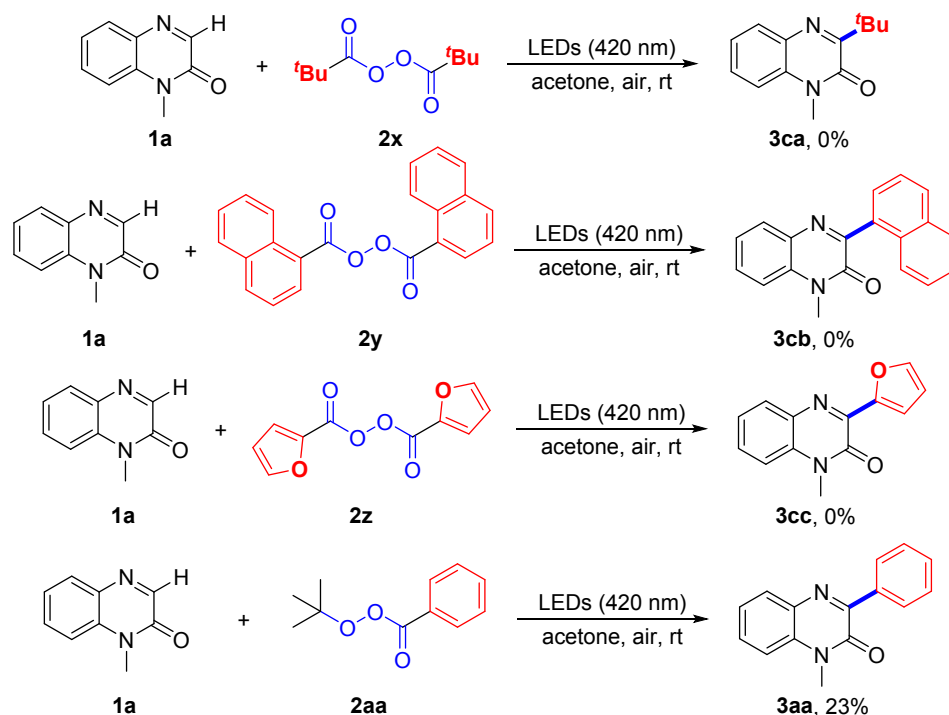

## 2. Fluorescence quenching experiment

The fluorescence quenching experiments were carried out, and the results were shown in Figure 1. In a typical experiment, to a 2.0 mL solution of 1-methyl-3-phenylquinoxalin-2(1*H*)-one (**3aa**) in acetone ( $2.0 \times 10^{-6}$  mol/L) was added different amounts of BPO (**2a**). It was found that the emission intensity of 1-methyl-3-phenylquinoxalin-2(1*H*)-one has been decreased along with the increasing of the amount of BPO.

## 3. Computational details

Geometry optimizations of all stationary points were carried out at the M06-2X<sup>1</sup>/6-311G(d,p) level. Vibrational frequency calculations were performed to identify that each of the species was a local minimum (no imaginary frequencies) or a transition state (one imaginary frequency). To confirm that each transition state connects the desired reactants and products along the reaction path, intrinsic reaction coordinate (IRC) calculations were conducted at the same level of theory. In order to obtain more accurate energies, single point energies were computed at the M06-2X/def2-TZVPP<sup>2</sup> level. The solvent effect of acetone was considered with SMD solvation model.<sup>3</sup> All calculations were performed using the Gaussian 16 C.01 package.<sup>4</sup>

### Cartesian coordinates of the optimized structures

#### A

|   |             |             |             |
|---|-------------|-------------|-------------|
| O | -2.43321200 | -1.02213500 | -0.00066200 |
| C | -1.70639000 | -0.00001000 | 0.00002800  |
| O | -2.43321100 | 1.02214100  | 0.00076400  |
| C | -0.23964800 | 0.00000100  | 0.00000200  |
| C | 0.44465300  | -1.21516900 | 0.00039000  |
| C | 0.44465000  | 1.21516900  | -0.00041100 |
| C | 1.83266100  | -1.21103400 | 0.00037900  |
| H | -0.10763500 | -2.14842400 | 0.00073800  |
| C | 1.83266100  | 1.21103300  | -0.00045000 |
| H | -0.10763000 | 2.14842900  | -0.00074100 |
| C | 2.52234200  | 0.00000100  | -0.00004700 |
| H | 2.37739600  | -2.14713500 | 0.00071100  |
| H | 2.37739300  | 2.14713600  | -0.00080200 |
| H | 3.60628800  | 0.00000100  | -0.00006600 |

#### TS<sub>A-B</sub>

|   |             |             |             |
|---|-------------|-------------|-------------|
| O | 2.35326600  | 1.14239500  | 0.12358000  |
| C | 2.03821200  | 0.00000000  | 0.00000000  |
| O | 2.35326600  | -1.14239500 | -0.12358100 |
| C | 0.17224700  | 0.00000000  | 0.00000000  |
| C | -0.44883400 | 1.22653600  | -0.05050000 |
| C | -0.44883500 | -1.22653600 | 0.05050000  |
| C | -1.84559600 | 1.20736700  | -0.05268500 |
| H | 0.10859900  | 2.15228400  | -0.08315500 |
| C | -1.84559600 | -1.20736700 | 0.05268500  |
| H | 0.10859900  | -2.15228400 | 0.08315500  |
| C | -2.53538500 | 0.00000000  | 0.00000000  |
| H | -2.38392000 | 2.14733500  | -0.09181100 |
| H | -2.38392100 | -2.14733400 | 0.09181100  |
| H | -3.61888400 | 0.00000000  | 0.00000000  |

#### B

|   |             |             |             |
|---|-------------|-------------|-------------|
| C | 0.00000000  | 1.39583600  | 0.00000000  |
| C | -1.22265200 | 0.76868800  | 0.00015300  |
| C | 1.22265200  | 0.76868800  | -0.00015300 |
| C | -1.21077300 | -0.63038900 | -0.00016000 |
| H | -2.15636800 | 1.32011100  | 0.00013500  |
| C | 1.21077300  | -0.63038900 | 0.00016000  |
| H | 2.15636800  | 1.32011100  | -0.00013500 |
| C | 0.00000000  | -1.32010400 | 0.00000000  |
| H | -2.14849700 | -1.17517100 | -0.00011600 |
| H | 2.14849700  | -1.17517100 | 0.00011600  |
| H | 0.00000000  | -2.40387000 | 0.00000000  |

**Int1**

|   |             |             |             |
|---|-------------|-------------|-------------|
| C | 2.08780000  | -2.22172400 | -1.10108700 |
| C | 1.57419300  | -0.99137300 | -1.47487000 |
| C | 1.41640900  | 0.01820400  | -0.51398700 |
| C | 1.78528200  | -0.23912800 | 0.82139800  |
| C | 2.30605500  | -1.49011300 | 1.17339300  |
| C | 2.45715300  | -2.48135000 | 0.22339700  |
| H | 2.20082200  | -2.99369400 | -1.85331900 |
| H | 1.28965400  | -0.81968000 | -2.50387400 |
| H | 2.57649000  | -1.64651500 | 2.21132200  |
| H | 2.85678300  | -3.44918600 | 0.49937900  |
| C | 1.10481500  | 1.83676200  | 1.49148900  |
| C | 0.64661600  | 2.20826200  | 0.13487600  |
| H | 0.96126500  | 2.60237500  | 2.24972600  |
| N | 1.62890700  | 0.71577100  | 1.81785000  |
| N | 0.87414700  | 1.25566300  | -0.83370400 |
| C | 0.42208800  | 1.52270500  | -2.19563400 |
| H | 1.25093900  | 1.40335400  | -2.89411900 |
| H | -0.38392900 | 0.83435400  | -2.46038300 |
| H | 0.05667700  | 2.54398100  | -2.23068300 |
| O | 0.11018200  | 3.28113000  | -0.08812600 |
| C | -1.50374100 | -0.10626000 | 0.57122400  |
| C | -1.54553900 | -1.47266800 | 0.42544800  |
| C | -2.56198500 | 0.75427600  | 0.40236800  |
| C | -2.78499400 | -2.02814700 | 0.09103900  |
| H | -0.66533100 | -2.09408500 | 0.56045000  |
| C | -3.79096700 | 0.17598000  | 0.06584000  |
| H | -2.45761200 | 1.82770000  | 0.51998700  |
| C | -3.89636100 | -1.20534700 | -0.08556900 |
| H | -2.87698100 | -3.10146900 | -0.03382300 |
| H | -4.66044200 | 0.80789900  | -0.07798400 |
| H | -4.85211600 | -1.64459600 | -0.34664200 |

**TS<sub>1-C</sub>**

|   |             |             |             |
|---|-------------|-------------|-------------|
| C | 3.43434200  | -1.11032000 | -1.19908100 |
| C | 2.67835700  | 0.04859500  | -1.25897800 |
| C | 1.74219900  | 0.32518000  | -0.25262300 |
| C | 1.58181200  | -0.58769300 | 0.81402400  |
| C | 2.36579600  | -1.75101500 | 0.85141200  |
| C | 3.28535200  | -2.01625300 | -0.14298100 |
| H | 4.15200200  | -1.31099900 | -1.98578700 |
| H | 2.81411600  | 0.73453300  | -2.08399700 |
| H | 2.21752900  | -2.42651000 | 1.68624500  |
| H | 3.88486900  | -2.91743500 | -0.10853000 |
| C | -0.10730200 | 0.65915500  | 1.72052100  |
| C | 0.04953400  | 1.74139400  | 0.71807900  |
| H | -0.79605400 | 0.88872800  | 2.52891700  |
| N | 0.66500400  | -0.37863100 | 1.82608700  |
| N | 0.98019900  | 1.48836000  | -0.26353700 |
| C | 1.16895600  | 2.47515900  | -1.32286700 |
| H | 2.20133900  | 2.82771800  | -1.32656000 |
| H | 0.93030600  | 2.03159000  | -2.29099900 |
| H | 0.49907600  | 3.30595600  | -1.12620500 |
| O | -0.61196800 | 2.76486400  | 0.77110400  |
| C | -1.89164200 | -0.17809900 | 0.43223000  |
| C | -1.85869500 | -1.54579400 | 0.31282600  |
| C | -2.84677700 | 0.65697200  | -0.09517900 |
| C | -2.89568200 | -2.13314800 | -0.41916700 |
| H | -1.07228600 | -2.14236200 | 0.76358700  |
| C | -3.87497500 | 0.04566100  | -0.82046800 |
| H | -2.80265000 | 1.73262200  | 0.03695800  |
| C | -3.89442900 | -1.33885700 | -0.97908700 |
| H | -2.91939800 | -3.20973300 | -0.54754200 |
| H | -4.65611500 | 0.65583200  | -1.26055200 |
| H | -4.69449000 | -1.80258500 | -1.54418000 |

|   |             |             |             |
|---|-------------|-------------|-------------|
| C |             |             |             |
| C | -3.87757300 | -0.86095500 | 0.71035000  |
| C | -3.05504500 | 0.25217400  | 0.84410200  |
| C | -1.85556100 | 0.33389600  | 0.13930700  |
| C | -1.45985700 | -0.75232500 | -0.72119900 |
| C | -2.34916700 | -1.86606700 | -0.84051200 |
| C | -3.52702400 | -1.92230200 | -0.14145100 |
| H | -4.80385300 | -0.90039800 | 1.27053900  |
| H | -3.35967800 | 1.05691100  | 1.49899200  |
| H | -2.03620700 | -2.66577400 | -1.50158100 |

|   |             |             |             |
|---|-------------|-------------|-------------|
| H | -4.18291800 | -2.77862300 | -0.23920300 |
| C | 0.61772500  | 0.28576300  | -1.19638700 |
| C | 0.13304600  | 1.55051800  | -0.49413500 |
| H | 0.97722700  | 0.61610800  | -2.17566900 |
| N | -0.32202400 | -0.78976000 | -1.39856600 |
| N | -1.04401300 | 1.46082000  | 0.21606900  |
| C | -1.48278100 | 2.61685800  | 0.99375600  |
| H | -2.43815200 | 2.98432900  | 0.61489600  |
| H | -1.58897600 | 2.34063400  | 2.04391500  |
| H | -0.72945500 | 3.39136700  | 0.89502800  |
| O | 0.79329400  | 2.56644700  | -0.53869300 |
| C | 1.83281100  | -0.21716200 | -0.41589500 |
| C | 1.65937700  | -1.01966300 | 0.71149400  |
| C | 3.11742300  | 0.15844900  | -0.80353000 |
| C | 2.76415500  | -1.44258700 | 1.44397000  |
| H | 0.66162900  | -1.31721300 | 1.01719300  |
| C | 4.22165900  | -0.26583900 | -0.07045500 |
| H | 3.25070200  | 0.78271700  | -1.68033400 |
| C | 4.04703800  | -1.06724400 | 1.05417500  |
| H | 2.62262600  | -2.06703900 | 2.31863400  |
| H | 5.21833800  | 0.02685600  | -0.38045500 |
| H | 4.90726800  | -1.39994200 | 1.62350900  |

## Int2

|   |             |             |             |
|---|-------------|-------------|-------------|
| C | -2.47496800 | -1.88490400 | -1.67042800 |
| C | -1.56785100 | -2.38107800 | -0.78027900 |
| C | -0.44817500 | -1.59296300 | -0.41279800 |
| C | -0.30531200 | -0.24720200 | -1.02340000 |
| C | -1.30721900 | 0.19049600  | -1.99269600 |
| C | -2.35301500 | -0.59525500 | -2.29986500 |
| H | -3.33582600 | -2.49565100 | -1.92041200 |
| H | -1.71698000 | -3.35690400 | -0.34218500 |
| H | -1.15752600 | 1.17511500  | -2.41830300 |
| H | -3.11211300 | -0.27814900 | -3.00266600 |
| C | 1.59625400  | 0.21327900  | 0.27236200  |
| C | 1.52169800  | -1.17078500 | 0.88327100  |
| H | 1.29450600  | 0.89120500  | 1.09757700  |
| N | 0.66120100  | 0.54688100  | -0.76113600 |
| N | 0.48947400  | -2.03787100 | 0.41083500  |
| C | 0.40576700  | -3.37641300 | 1.00413700  |
| H | -0.44695600 | -3.41114200 | 1.68429800  |
| H | 0.29530600  | -4.11692200 | 0.21385200  |
| H | 1.32210900  | -3.55627200 | 1.55462300  |

|   |             |             |             |
|---|-------------|-------------|-------------|
| O | 2.28967000  | -1.55291700 | 1.71797500  |
| C | 3.01793400  | 0.54410700  | -0.14387300 |
| C | 3.42942900  | 0.34009100  | -1.45967500 |
| C | 3.92333400  | 1.02399800  | 0.80027700  |
| C | 4.74146300  | 0.61869900  | -1.82971300 |
| H | 2.72551300  | -0.03391700 | -2.19555300 |
| C | 5.23529900  | 1.29818700  | 0.42887400  |
| H | 3.59798400  | 1.18483400  | 1.82192000  |
| C | 5.64597100  | 1.09664500  | -0.88617700 |
| H | 5.05629900  | 0.46104100  | -2.85478200 |
| H | 5.93512900  | 1.67507700  | 1.16565600  |
| H | 6.66777600  | 1.31395400  | -1.17504600 |
| O | -0.80313500 | -0.18014300 | 2.04534000  |
| C | -1.11649900 | 0.96812100  | 1.65321900  |
| O | -0.40926400 | 1.99485400  | 1.69990900  |
| C | -2.47910000 | 1.09416600  | 0.96600200  |
| C | -3.38887400 | 0.03859600  | 0.99896600  |
| C | -2.79528300 | 2.24304600  | 0.23873500  |
| C | -4.59448800 | 0.12254400  | 0.30834200  |
| H | -3.12868900 | -0.85012600 | 1.56206300  |
| C | -3.99534100 | 2.32934600  | -0.46042100 |
| H | -2.07874400 | 3.05626400  | 0.22560000  |
| C | -4.89621100 | 1.26632600  | -0.42927200 |
| H | -5.29798400 | -0.70264300 | 0.34014000  |
| H | -4.22948200 | 3.22155700  | -1.03073700 |
| H | -5.83209100 | 1.33098100  | -0.97326800 |

**TS<sub>2-3</sub>**

|   |             |             |             |
|---|-------------|-------------|-------------|
| C | -2.70634300 | 1.63229500  | 1.73520900  |
| C | -1.80222100 | 2.24425900  | 0.91482800  |
| C | -0.59136600 | 1.58140100  | 0.59888200  |
| C | -0.34518900 | 0.25074600  | 1.18829300  |
| C | -1.34230500 | -0.31477700 | 2.08623200  |
| C | -2.48766100 | 0.34583000  | 2.33866900  |
| H | -3.63834900 | 2.14525800  | 1.94671800  |
| H | -2.02117400 | 3.21440100  | 0.49424800  |
| H | -1.11617900 | -1.29032700 | 2.49915800  |
| H | -3.25078500 | -0.07221000 | 2.98192700  |
| C | 1.60326500  | -0.00897100 | -0.07422900 |
| C | 1.51304100  | 1.41886100  | -0.55025700 |
| H | 1.17553100  | -0.59801800 | -0.95960800 |
| N | 0.71195500  | -0.43567800 | 0.94299200  |
| N | 0.34034300  | 2.13478600  | -0.16892900 |
| C | 0.13105300  | 3.45897700  | -0.76135300 |

|   |             |             |             |
|---|-------------|-------------|-------------|
| H | -0.71351400 | 3.39831700  | -1.44940900 |
| H | -0.06526400 | 4.18659200  | 0.02437300  |
| H | 1.03016600  | 3.73072000  | -1.30198700 |
| O | 2.33789700  | 1.94003400  | -1.24609700 |
| C | 3.02387200  | -0.47291800 | 0.14680300  |
| C | 3.52542000  | -0.61883200 | 1.43867900  |
| C | 3.84122600  | -0.74869400 | -0.94877500 |
| C | 4.83744100  | -1.04007800 | 1.63350700  |
| H | 2.88938600  | -0.40535700 | 2.29089300  |
| C | 5.15270300  | -1.16611100 | -0.75198100 |
| H | 3.44582000  | -0.64143800 | -1.95273600 |
| C | 5.65287100  | -1.31309500 | 0.53947400  |
| H | 5.22182900  | -1.15277200 | 2.64067000  |
| H | 5.78215000  | -1.38312300 | -1.60719300 |
| H | 6.67447200  | -1.64159000 | 0.69196600  |
| O | -0.84448700 | 0.50229400  | -2.10253500 |
| C | -0.99269800 | -0.67079000 | -1.71173800 |
| O | -0.11032200 | -1.56789500 | -1.70163700 |
| C | -2.34288500 | -1.03990000 | -1.09744900 |
| C | -3.40082200 | -0.13278500 | -1.12636900 |
| C | -2.50896500 | -2.26189500 | -0.44349000 |
| C | -4.60871400 | -0.43727500 | -0.50481800 |
| H | -3.25605900 | 0.81517900  | -1.63158100 |
| C | -3.71254600 | -2.56876100 | 0.18346400  |
| H | -1.67630000 | -2.95543700 | -0.42734000 |
| C | -4.76411600 | -1.65473800 | 0.15577300  |
| H | -5.42835000 | 0.27259700  | -0.53276100 |
| H | -3.83183800 | -3.51711500 | 0.69560700  |
| H | -5.70269700 | -1.89138900 | 0.64463200  |

**Int3**

|   |             |             |             |
|---|-------------|-------------|-------------|
| C | -3.76453600 | 1.44340700  | 1.15673600  |
| C | -2.87558900 | 2.06508600  | 0.29516800  |
| C | -1.52146700 | 1.70190200  | 0.31626300  |
| C | -1.08452200 | 0.70920200  | 1.21171300  |
| C | -2.00473300 | 0.08651700  | 2.06487500  |
| C | -3.33702900 | 0.45163800  | 2.04605300  |
| H | -4.80815600 | 1.73481300  | 1.13476400  |
| H | -3.23021200 | 2.82910100  | -0.38293400 |
| H | -1.63243000 | -0.68270300 | 2.73201300  |
| H | -4.04584600 | -0.02935100 | 2.70883300  |
| C | 1.10218100  | 0.86752900  | 0.48446900  |
| C | 0.75813200  | 1.97917600  | -0.45643100 |



|   |             |             |             |
|---|-------------|-------------|-------------|
| H | 2.31219400  | -1.95399200 | -1.06674400 |
| N | 0.23504400  | 0.30085600  | 1.25036600  |
| N | -0.58407500 | 2.28873200  | -0.52142000 |
| C | -1.01157500 | 3.31905300  | -1.46530500 |
| H | -1.78479300 | 2.91613200  | -2.12073900 |
| H | -1.40310700 | 4.18359300  | -0.92613200 |
| H | -0.14946300 | 3.61560400  | -2.05283300 |
| O | 1.59402100  | 2.57410400  | -1.11272900 |
| C | 2.50705300  | 0.39046500  | 0.55727300  |
| C | 2.96781800  | -0.13893500 | 1.76778900  |
| C | 3.35146500  | 0.37170400  | -0.55995100 |
| C | 4.24465200  | -0.67579400 | 1.86407400  |
| H | 2.31303300  | -0.12658100 | 2.63061200  |
| C | 4.62410100  | -0.18302300 | -0.46234700 |
| H | 3.00255400  | 0.76656400  | -1.50253400 |
| C | 5.07585300  | -0.70407700 | 0.74696300  |
| H | 4.59117700  | -1.07413300 | 2.81060100  |
| H | 5.26476600  | -0.20509300 | -1.33643600 |
| H | 6.07121300  | -1.12711700 | 0.81940800  |
| O | 0.80080300  | -0.66052700 | -2.19986200 |
| C | 0.51542900  | -1.52371100 | -1.40531900 |
| O | 1.43700500  | -2.28168700 | -0.80125700 |
| C | -0.87542100 | -1.85270900 | -0.99209600 |
| C | -1.91605000 | -1.10246900 | -1.54132300 |
| C | -1.14527800 | -2.85692600 | -0.06208700 |
| C | -3.22766800 | -1.36261000 | -1.16667700 |
| H | -1.68367900 | -0.31818900 | -2.25292400 |
| C | -2.46032600 | -3.11751100 | 0.30626600  |
| H | -0.33173700 | -3.42679400 | 0.36873200  |
| C | -3.49949300 | -2.37309400 | -0.24596300 |
| H | -4.03732600 | -0.77887400 | -1.58883500 |
| H | -2.67387900 | -3.89880700 | 1.02601500  |
| H | -4.52369400 | -2.57533600 | 0.04644200  |

### [1,2]-H shift

We have also calculated the [1,2]-H shift step and the structure of the transition state is shown in the following figure. The reaction barrier is calculated to be 36.9 kcal/mol.

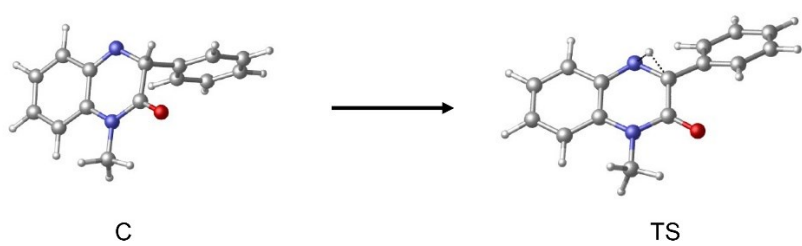

### Cartesian coordinates of the transition state

|   |             |             |             |
|---|-------------|-------------|-------------|
| C | -4.33804200 | -0.79431800 | 0.13678600  |
| C | -3.56199200 | 0.35821700  | 0.20042700  |
| C | -2.17669600 | 0.28734900  | 0.03298200  |
| C | -1.57616800 | -0.97061000 | -0.19379900 |
| C | -2.37807100 | -2.11730200 | -0.26312900 |
| C | -3.74980300 | -2.03640700 | -0.09672900 |
| H | -5.41019600 | -0.71517400 | 0.27092100  |
| H | -4.04227200 | 1.30963700  | 0.38204800  |
| H | -1.88372100 | -3.06507000 | -0.44317500 |
| H | -4.35805200 | -2.93112000 | -0.14747400 |
| C | 0.59783400  | 0.05744500  | -0.29400200 |
| C | 0.00529600  | 1.38757000  | -0.01897400 |
| H | 0.20490100  | -0.50388500 | -1.37207200 |
| N | -0.20881000 | -1.13122900 | -0.34275500 |
| N | -1.37475600 | 1.43504500  | 0.07794100  |
| C | -2.00632200 | 2.72983000  | 0.30624800  |
| H | -2.74852100 | 2.92274100  | -0.47037300 |
| H | -2.49316600 | 2.74801600  | 1.28385000  |
| H | -1.23628000 | 3.49278700  | 0.27120700  |
| O | 0.68718700  | 2.38920700  | 0.10511300  |
| C | 2.04679800  | -0.16964000 | -0.11000700 |
| C | 2.48700700  | -1.36725000 | 0.46892300  |
| C | 3.00164400  | 0.76702100  | -0.53396800 |
| C | 3.84477600  | -1.61615500 | 0.63322100  |
| H | 1.75635700  | -2.09690300 | 0.79465100  |
| C | 4.35618300  | 0.51069400  | -0.36770000 |
| H | 2.67775300  | 1.69026400  | -0.99339200 |
| C | 4.78548000  | -0.67912800 | 0.21706700  |
| H | 4.16698000  | -2.54428900 | 1.09151200  |
| H | 5.08205300  | 1.24266700  | -0.70324600 |
| H | 5.84409000  | -0.87394700 | 0.34426100  |

## 4. References

1. Y. Zhao and D. G. Truhlar, The M06 suite of density functionals for main group thermochemistry, thermochemical kinetics, noncovalent interactions, excited states, and transition elements: two new functionals and systematic testing of four M06-class functionals and 12 other functionals, *Theor. Chem. Acc.*, 2008, **120**, 215-241.

2. F. Weigend and R. Ahlrichs, Balanced basis sets of split valence, triple zeta valence and quadruple zeta valence quality for H to Rn: Design and assessment of accuracy, *Phys. Chem. Chem. Phys.*, 2005, **7**, 3297-3305.
3. A. V. Marenich, C. J. Cramer and D. G. Truhlar, Universal Solvation Model Based on Solute Electron Density and on a Continuum Model of the Solvent Defined by the Bulk Dielectric Constant and Atomic Surface Tensions, *J. Phys. Chem. B*, 2009, **113**, 6378-6396.
4. M. J. Frisch, G. W. Trucks, H. B. Schlegel, G. E. Scuseria, M. A. Robb, J. R. Cheeseman, G. Scalmani, V. Barone, G. A. Petersson, H. Nakatsuji, X. Li, M. Caricato, A. V. Marenich, J. Bloino, B. G. Janesko, R. Gomperts, B. Mennucci, H. P. Hratchian, J. V. Ortiz, A. F. Izmaylov, J. L. Sonnenberg, Williams, F. Ding, F. Lipparini, F. Egidi, J. Goings, B. Peng, A. Petrone, T. Henderson, D. Ranasinghe, V. G. Zakrzewski, J. Gao, N. Rega, G. Zheng, W. Liang, M. Hada, M. Ehara, K. Toyota, R. Fukuda, J. Hasegawa, M. Ishida, T. Nakajima, Y. Honda, O. Kitao, H. Nakai, T. Vreven, K. Throssell, J. A. Montgomery Jr., J. E. Peralta, F. Ogliaro, M. J. Bearpark, J. J. Heyd, E. N. Brothers, K. N. Kudin, V. N. Staroverov, T. A. Keith, R. Kobayashi, J. Normand, K. Raghavachari, A. P. Rendell, J. C. Burant, S. S. Iyengar, J. Tomasi, M. Cossi, J. M. Millam, M. Klene, C. Adamo, R. Cammi, J. W. Ochterski, R. L. Martin, K. Morokuma, O. Farkas, J. B. Foresman and D. J. Fox, Gaussian 16 Rev. C.01., Wallingford, CT, 2016.

## **5. Copies of NMR spectra**

### **3aa <sup>1</sup>H NMR**

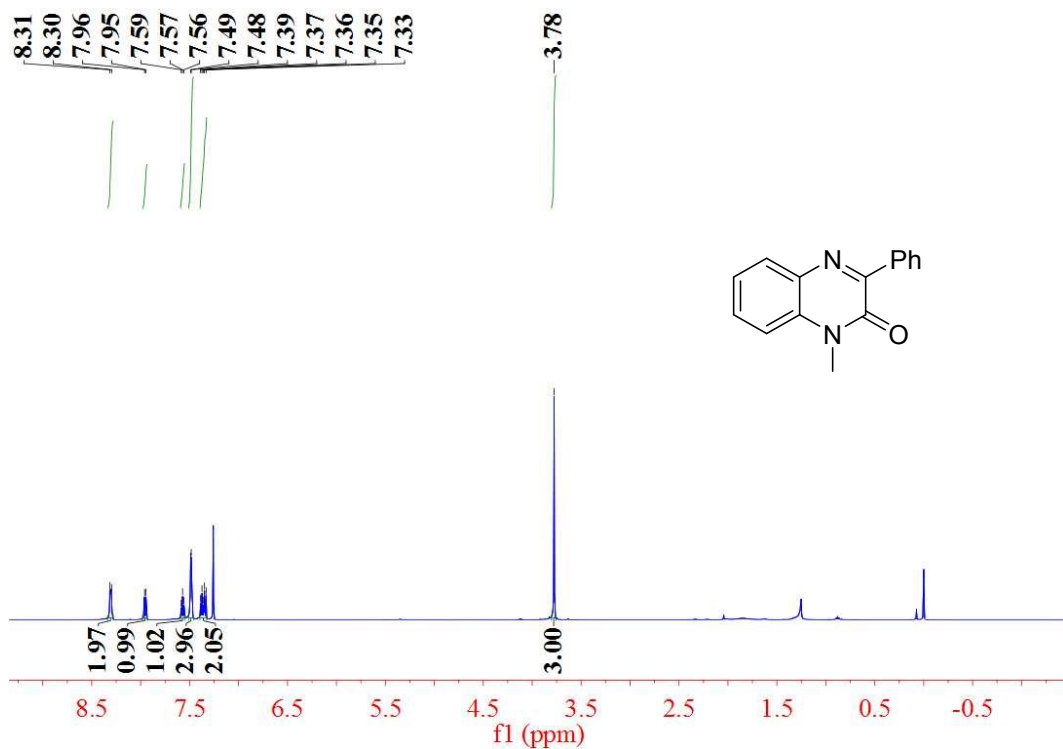

### 3aa <sup>13</sup>C NMR

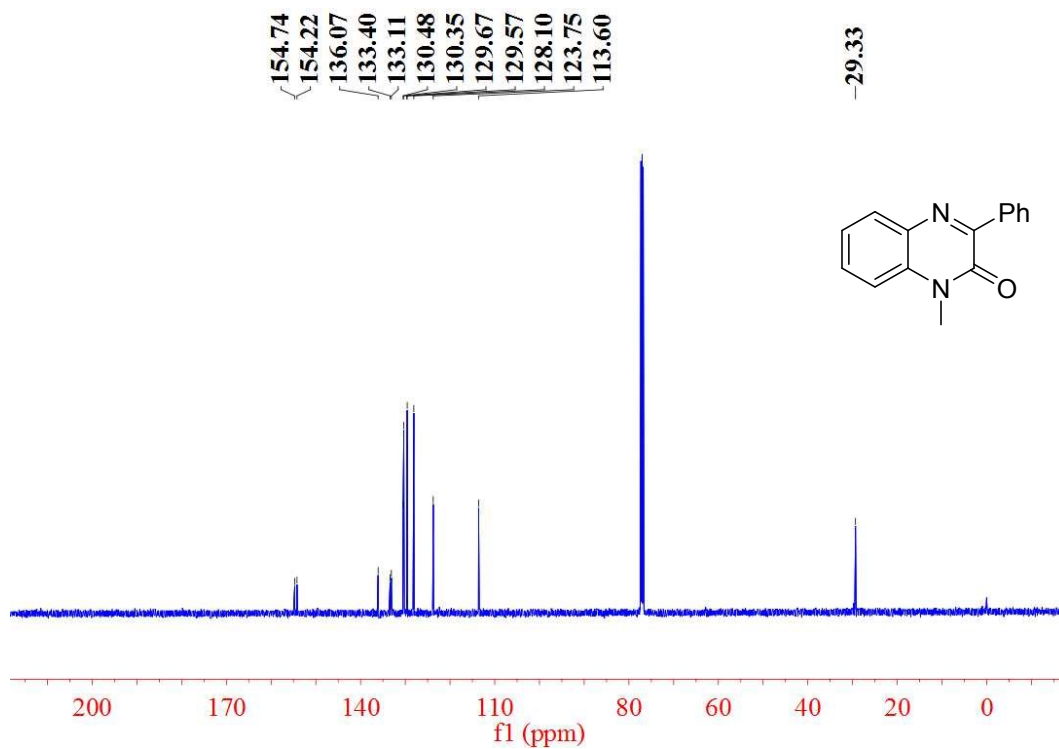

### 3ab <sup>1</sup>H NMR

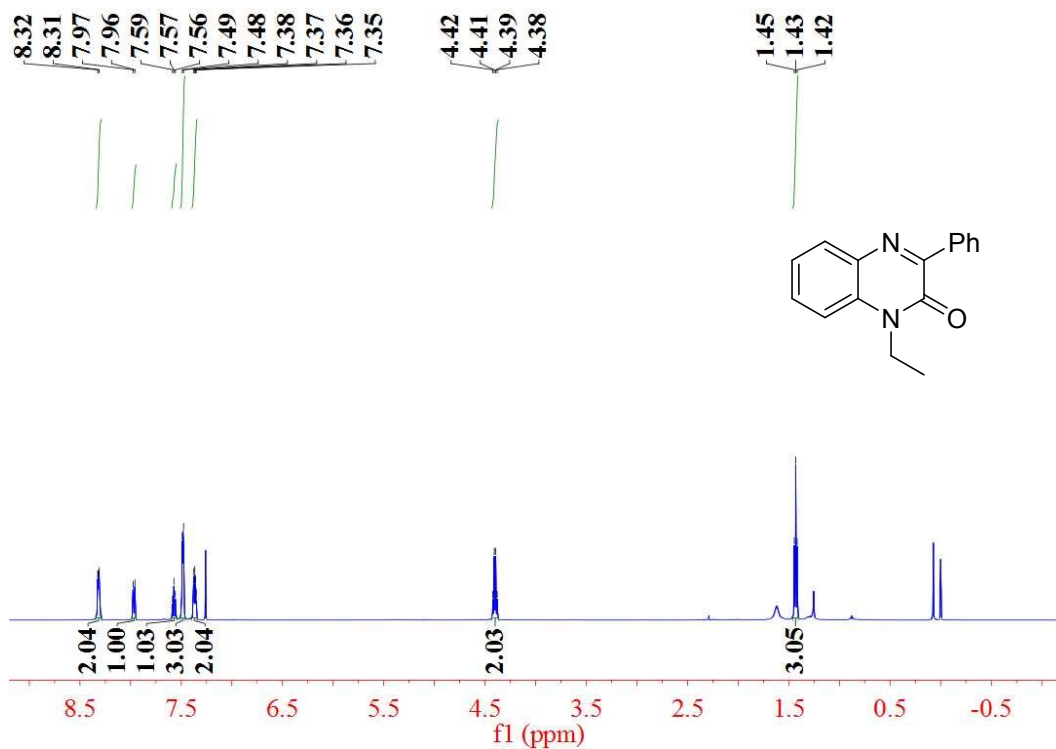

### 3ab <sup>13</sup>C NMR

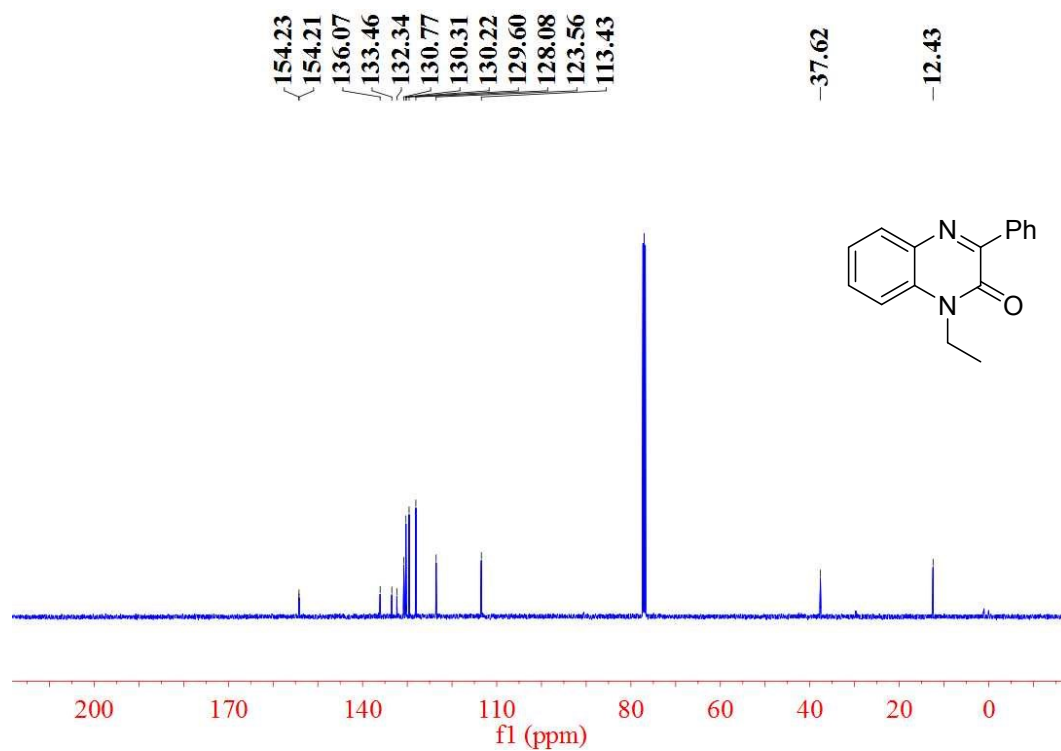

### 3ac <sup>1</sup>H NMR

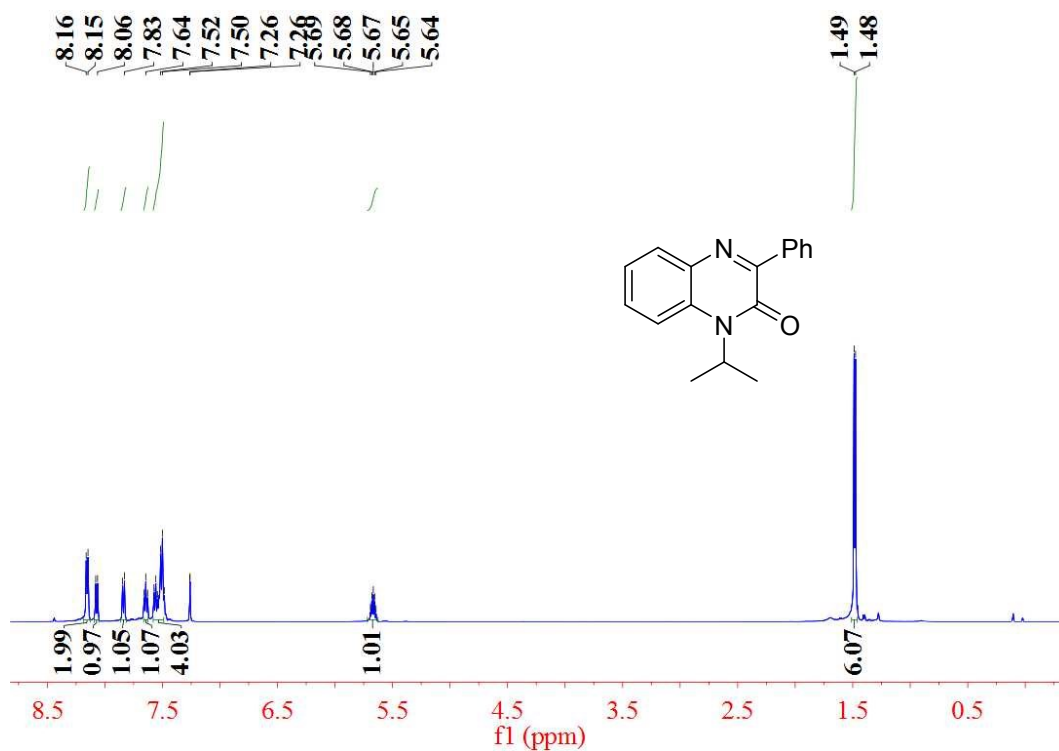

### 3ac <sup>13</sup>C NMR

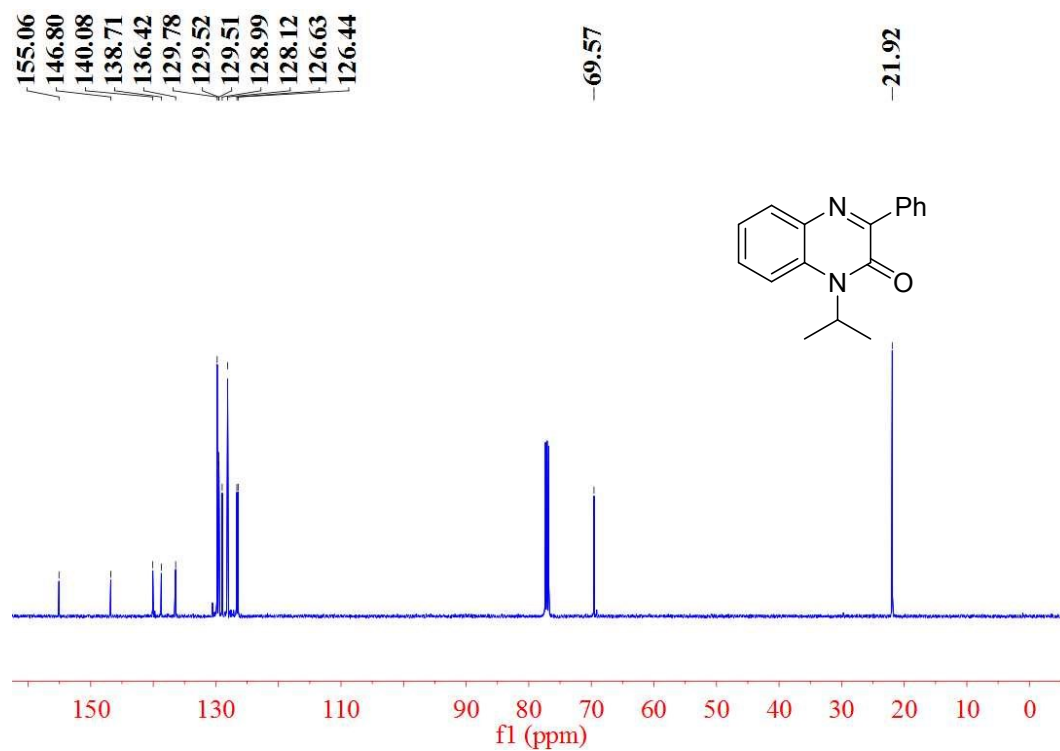

### 3ad <sup>1</sup>H NMR

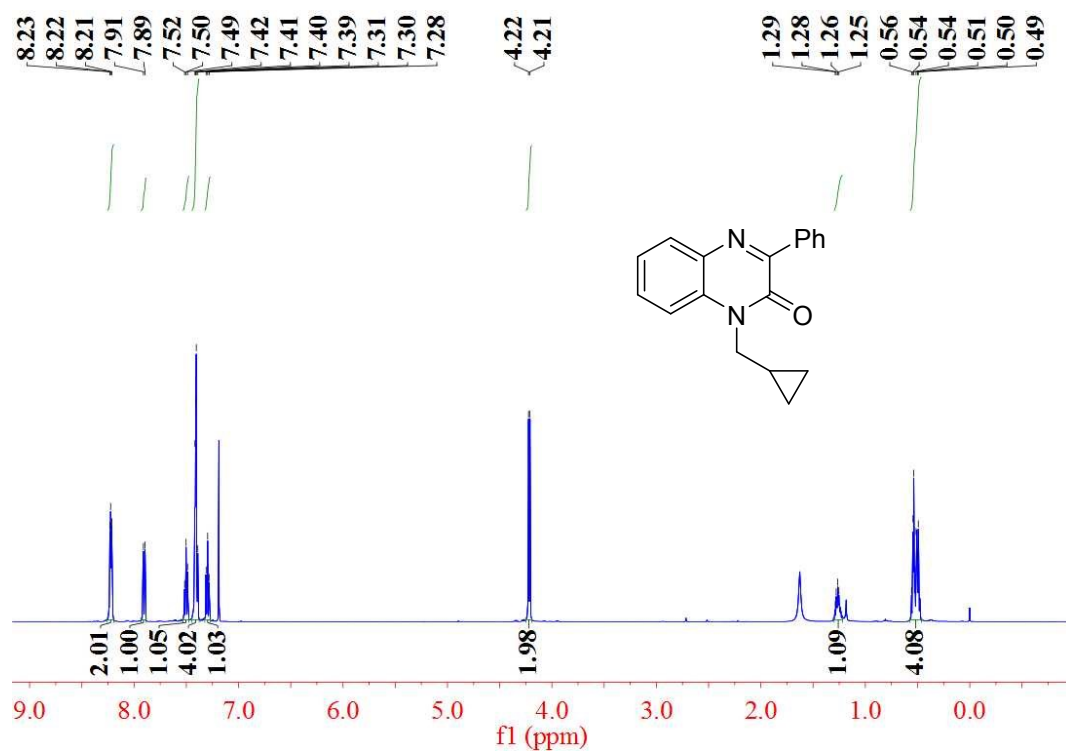

### 3ad <sup>13</sup>C NMR

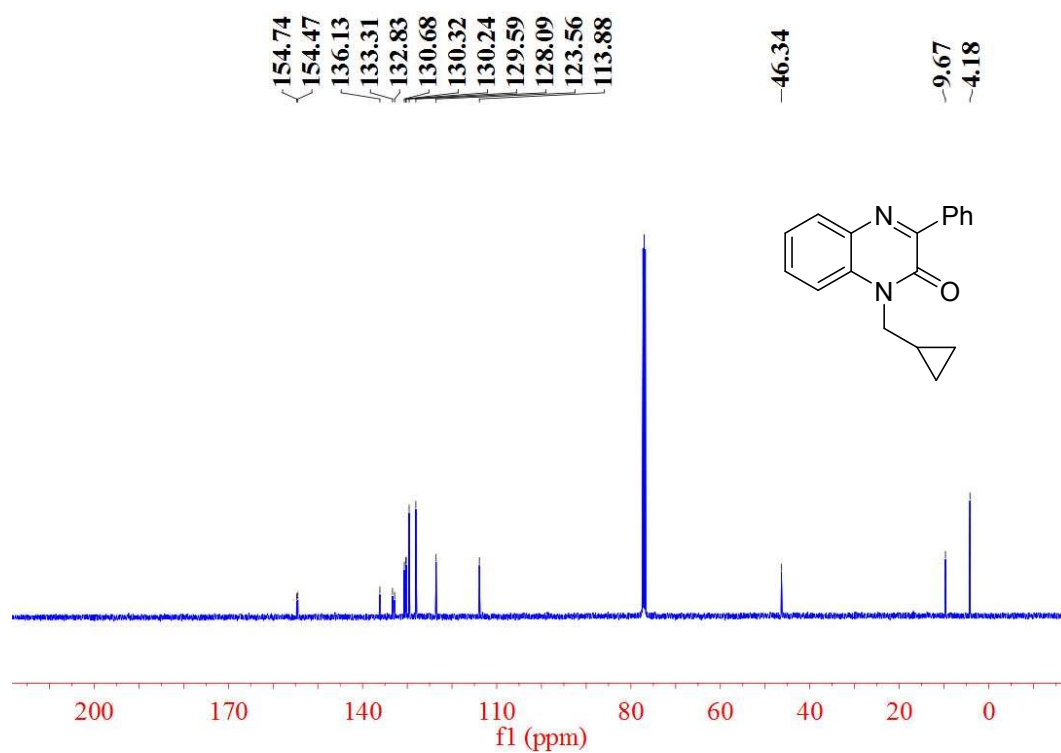

### 3ae <sup>1</sup>H NMR

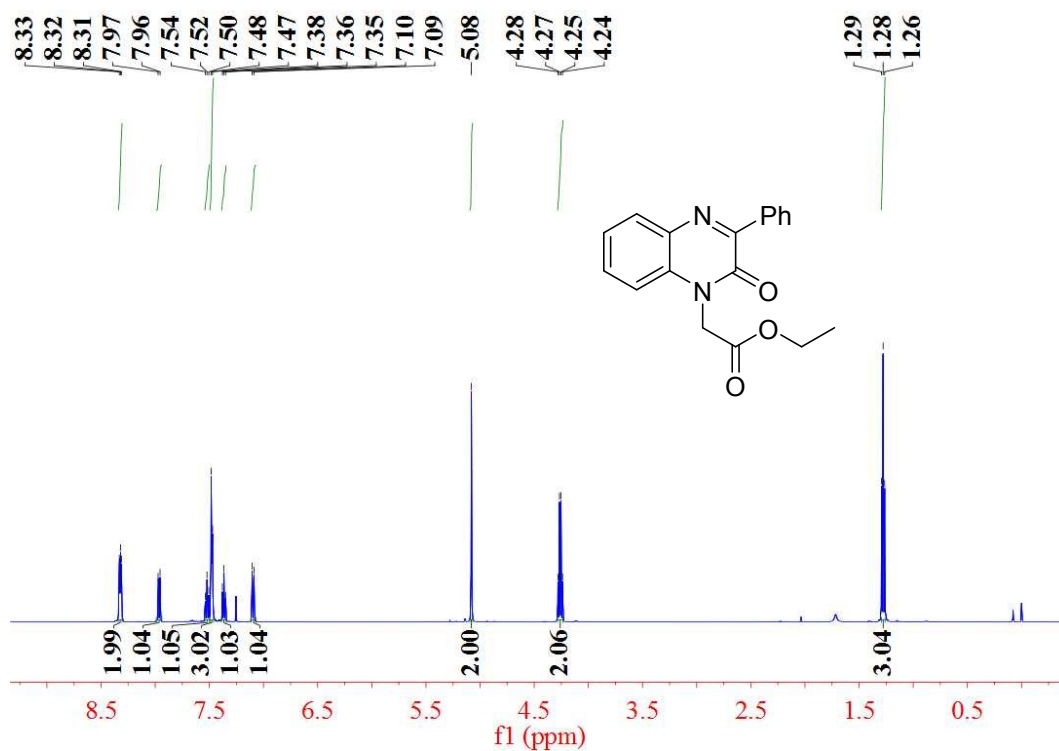

### 3ae <sup>13</sup>C NMR

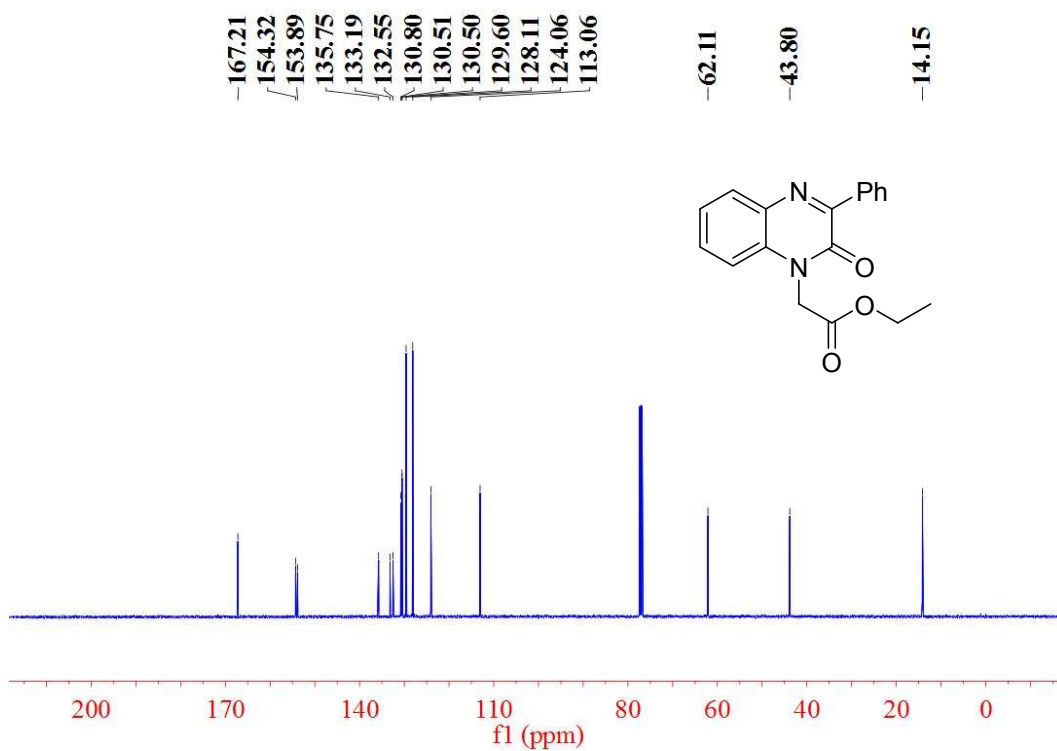



### 3af <sup>1</sup>H NMR

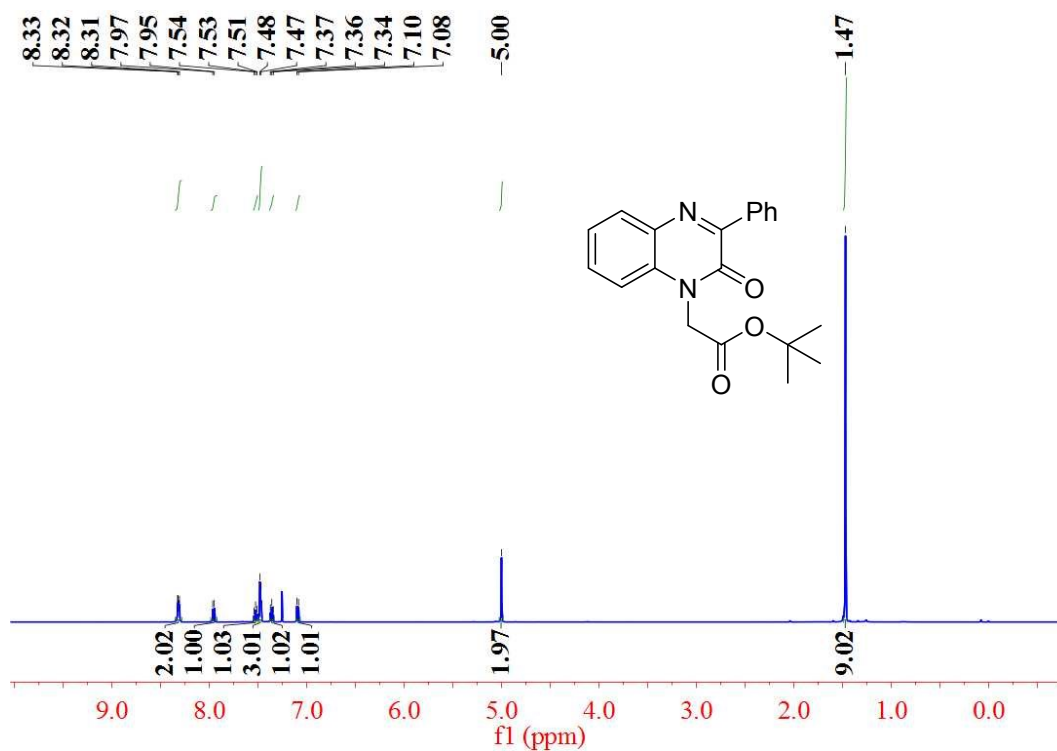

### 3af <sup>13</sup>C NMR

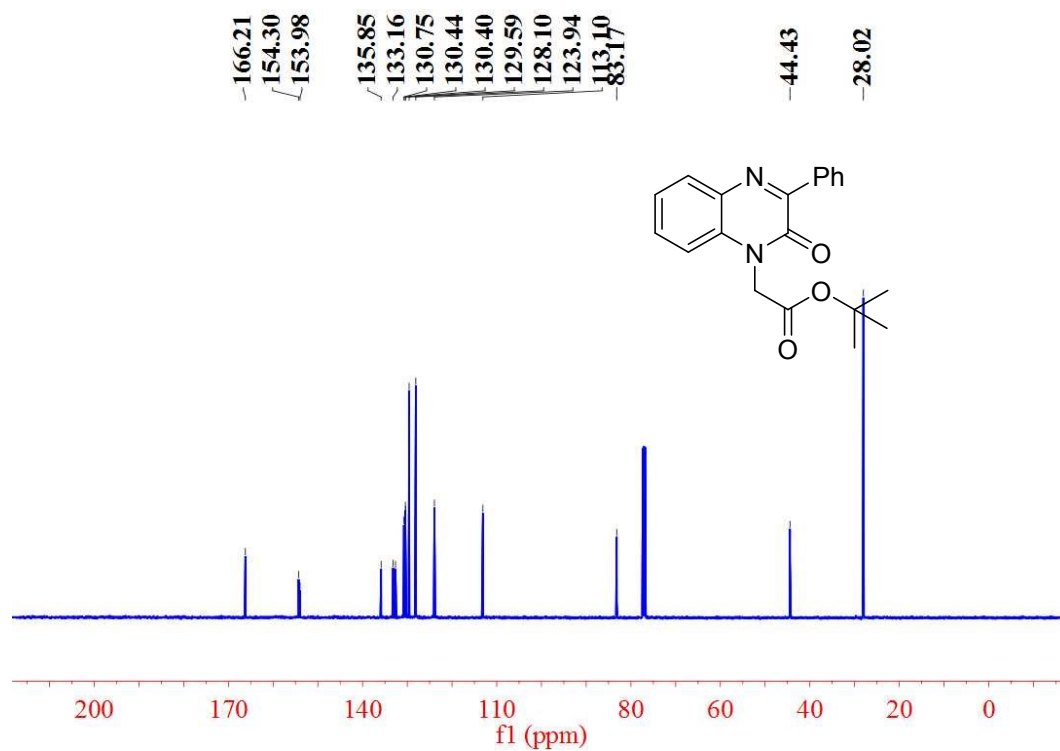

### 3ag <sup>1</sup>H NMR

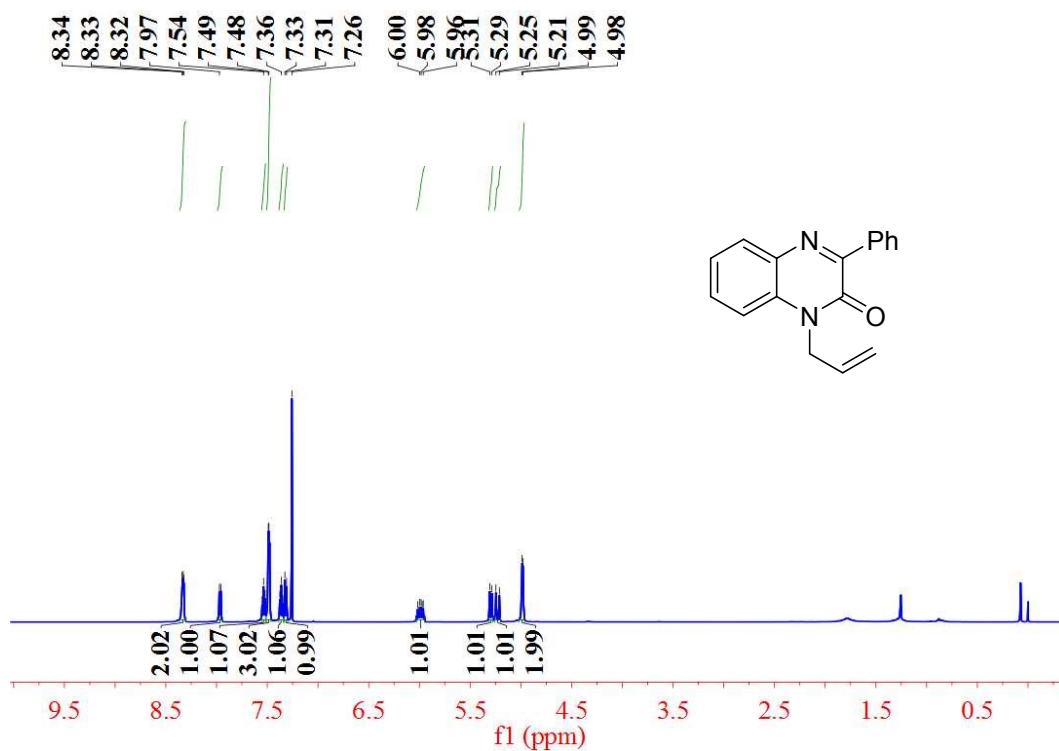

### 3ag <sup>13</sup>C NMR

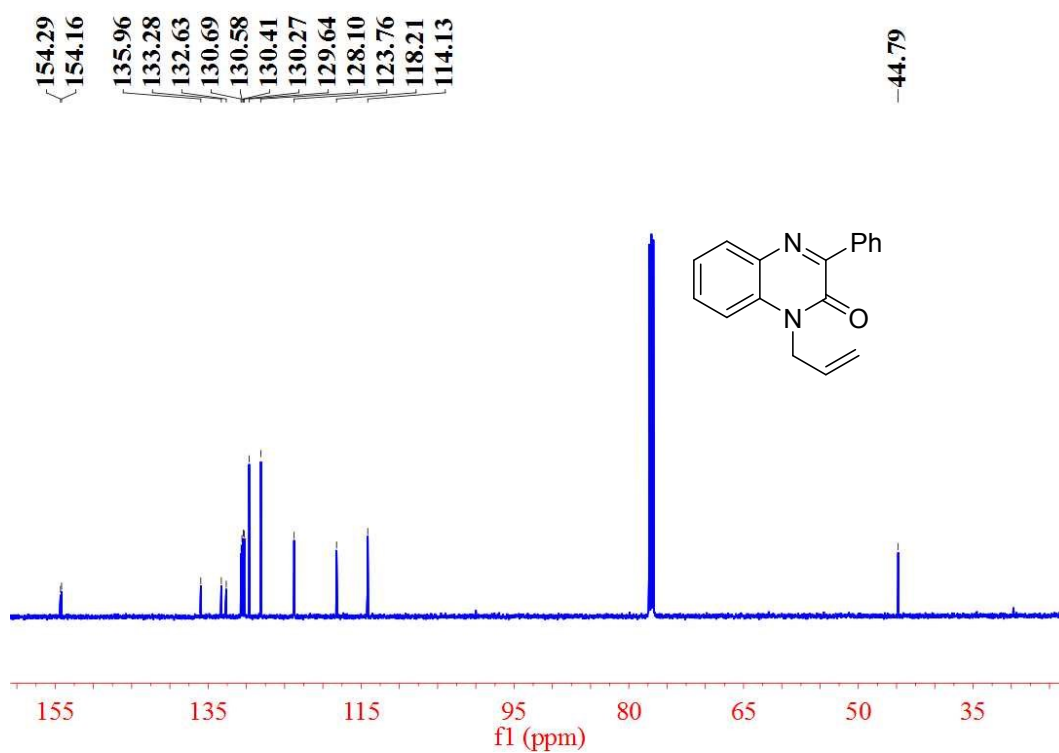

### 3ah <sup>1</sup>H NMR

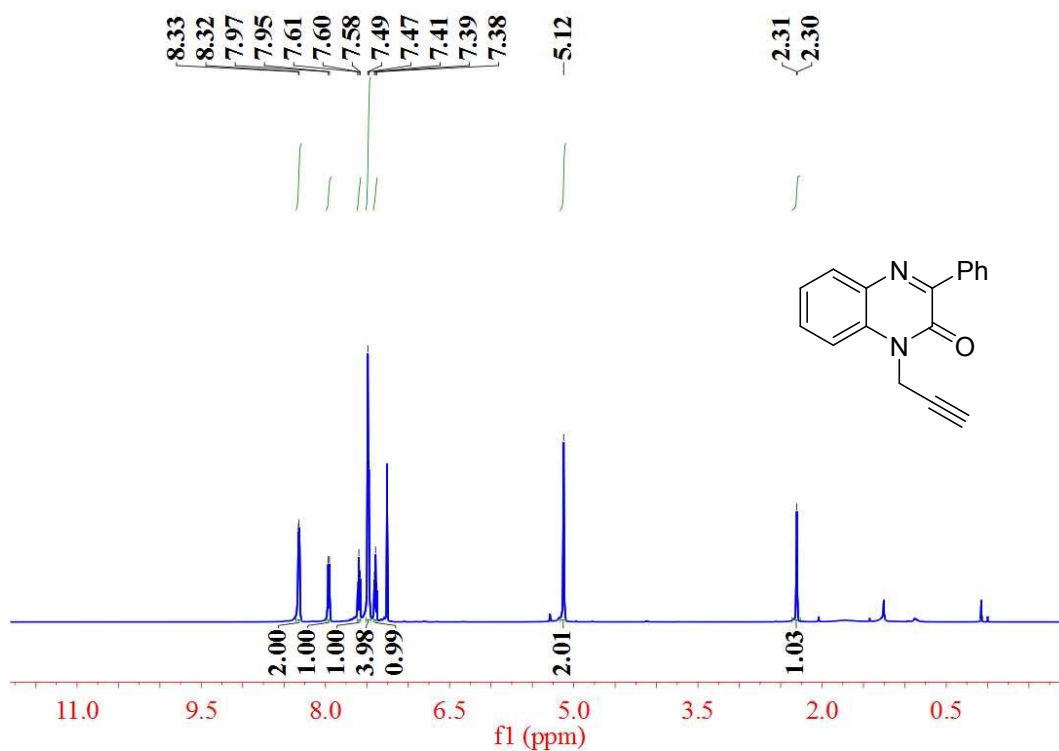

### 3ah <sup>13</sup>C NMR

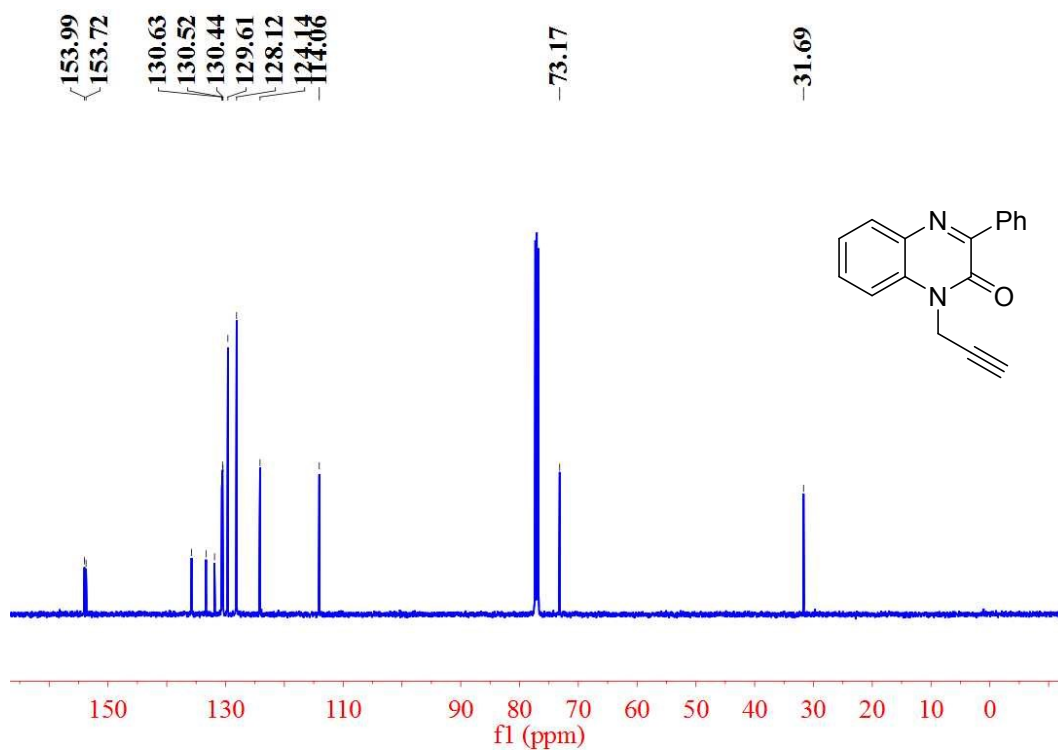

### 3ai <sup>1</sup>H NMR

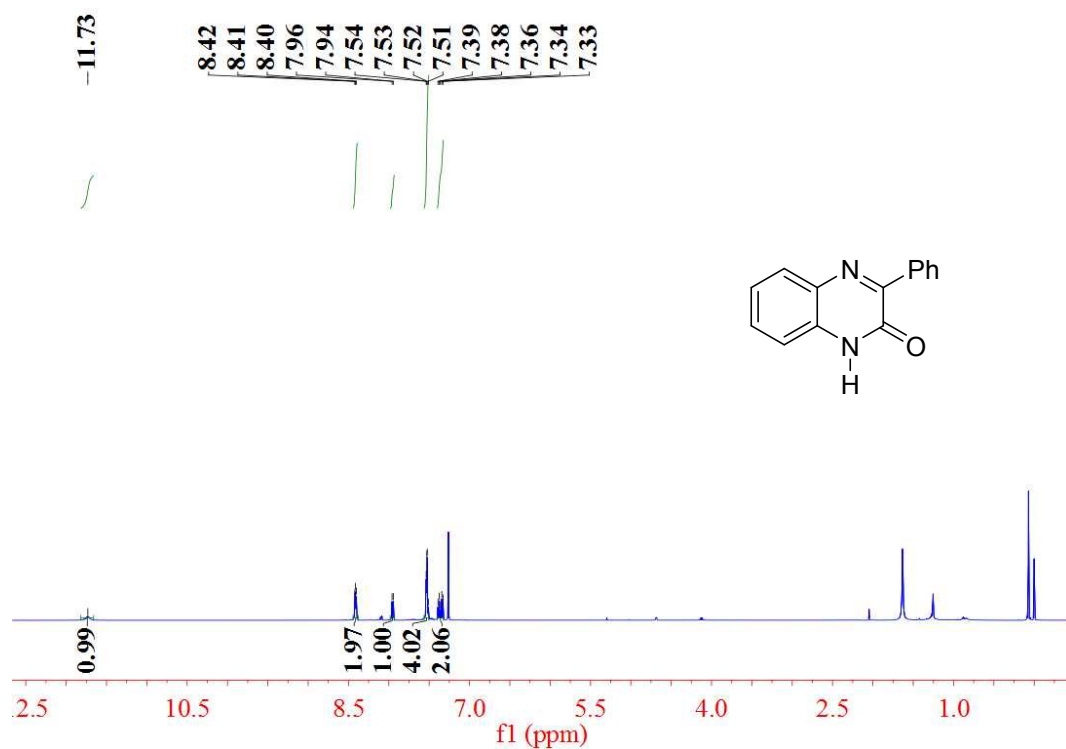

### 3ai <sup>13</sup>C NMR

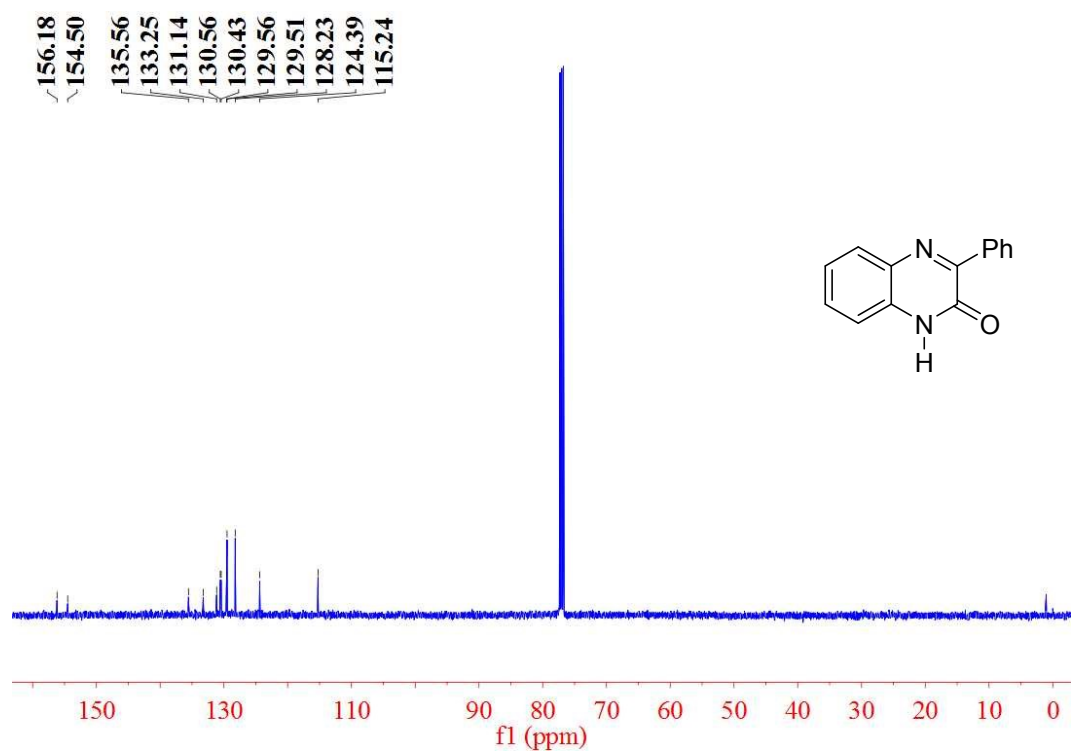

### 3aj <sup>1</sup>H NMR

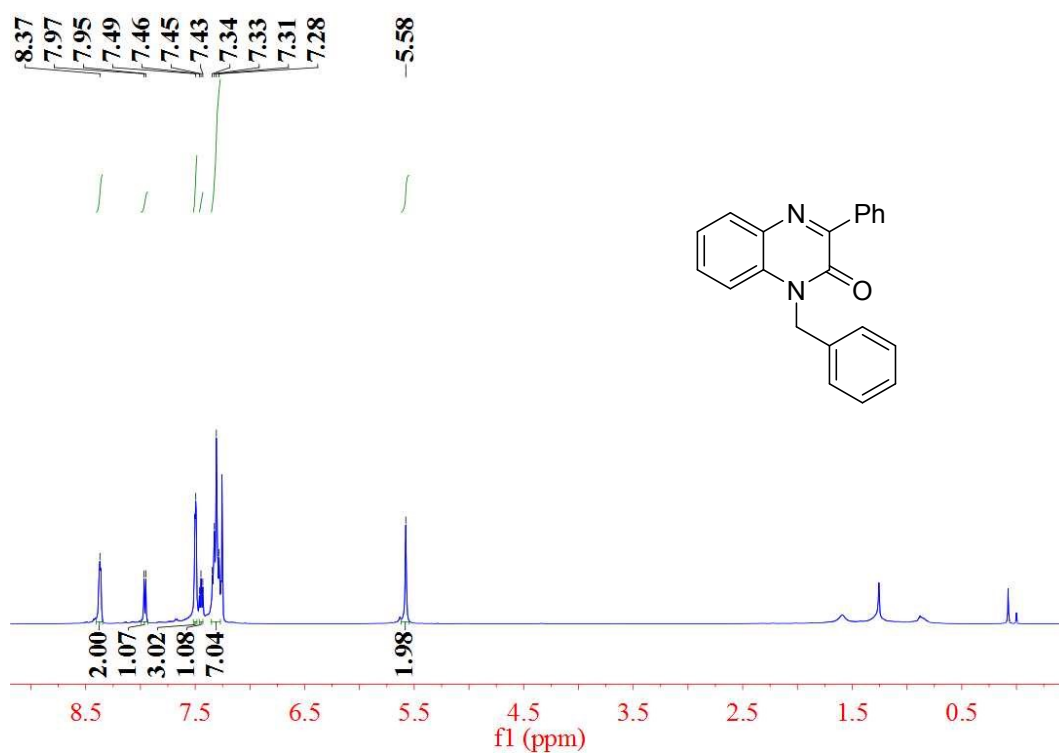

### 3aj <sup>13</sup>C NMR

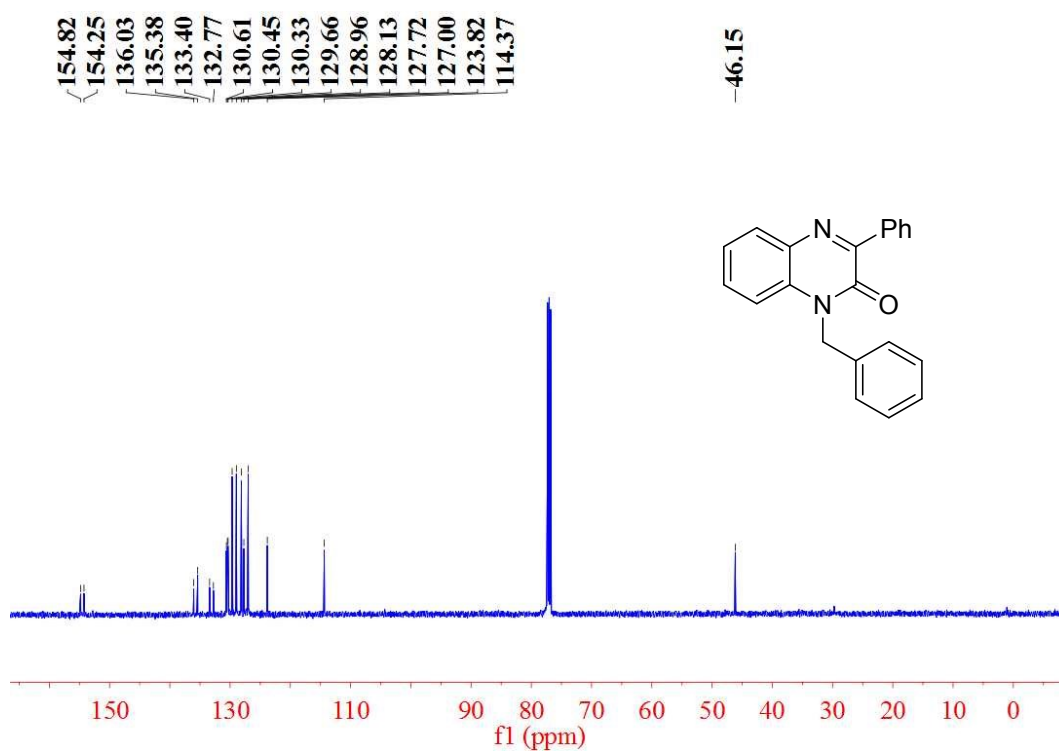

### 3ak <sup>1</sup>H NMR

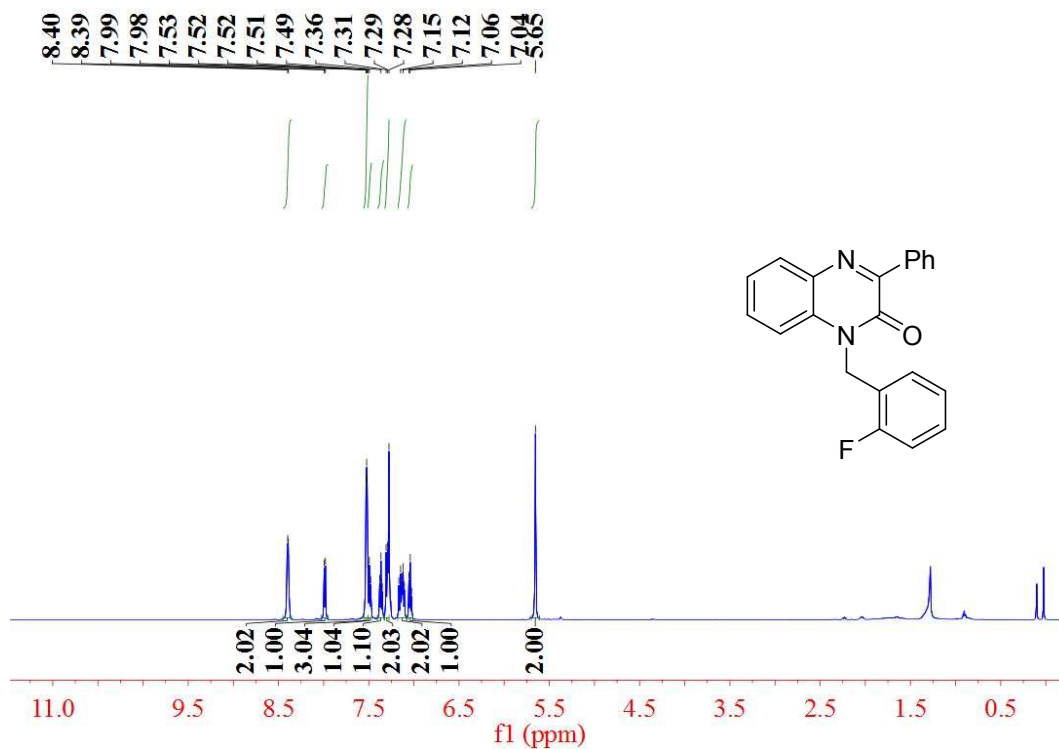

### 3ak <sup>13</sup>C NMR

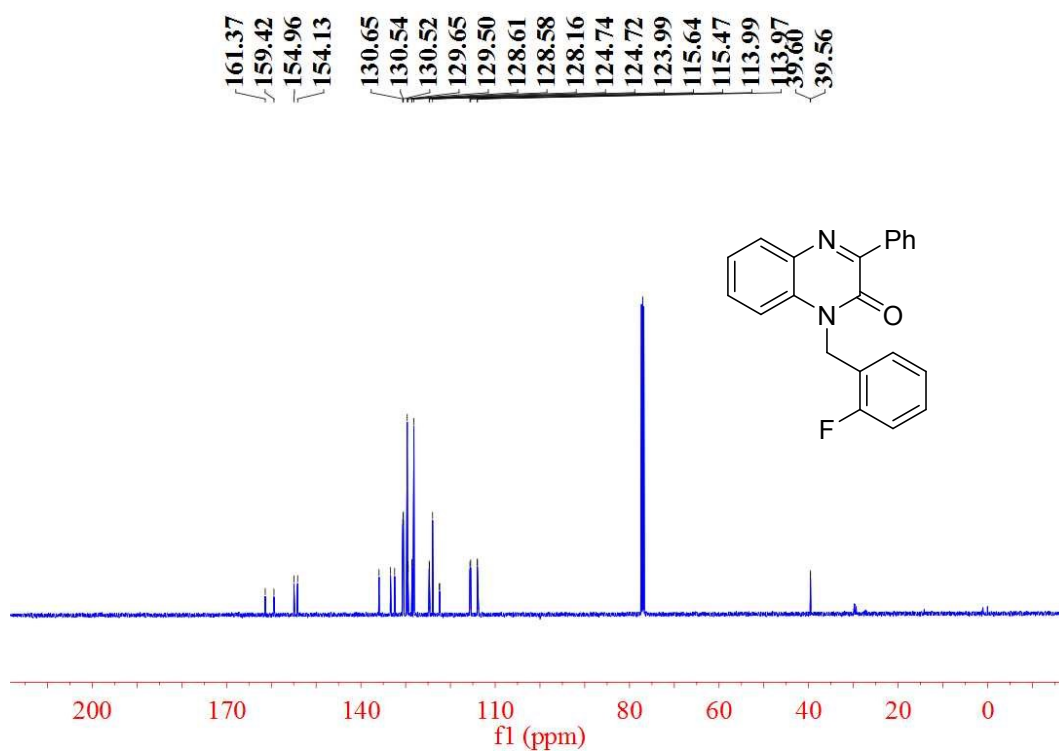

### 3al <sup>1</sup>H NMR

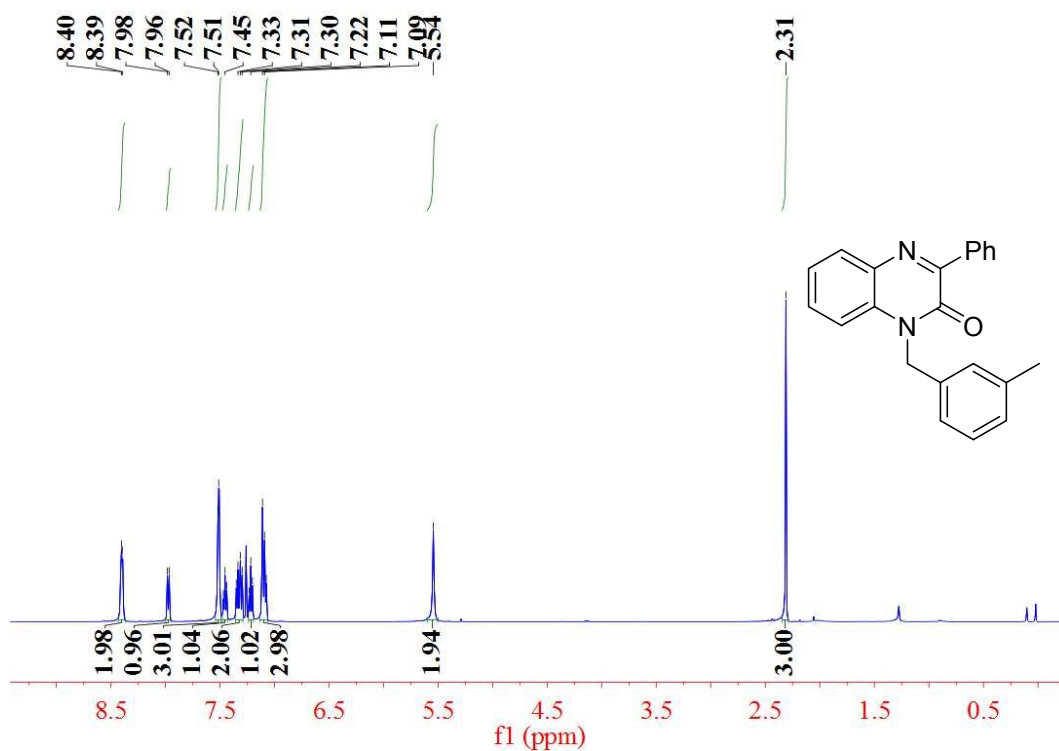

### 3al <sup>13</sup>C NMR

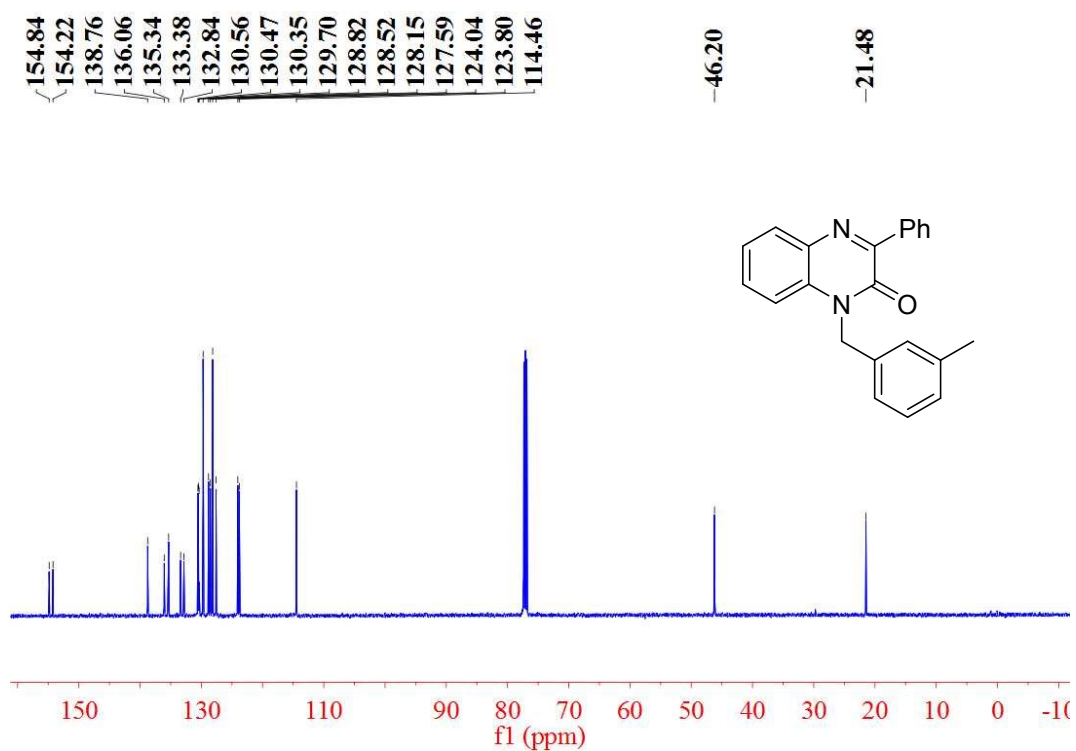

### 3am <sup>1</sup>H NMR

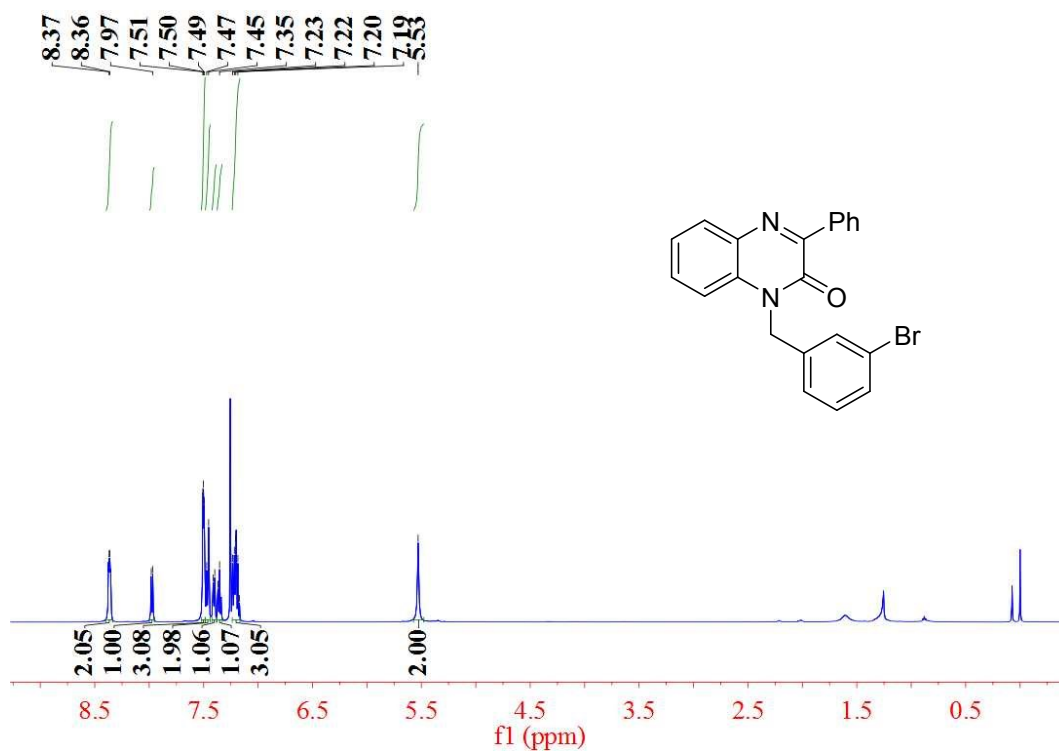

### 3am <sup>13</sup>C NMR

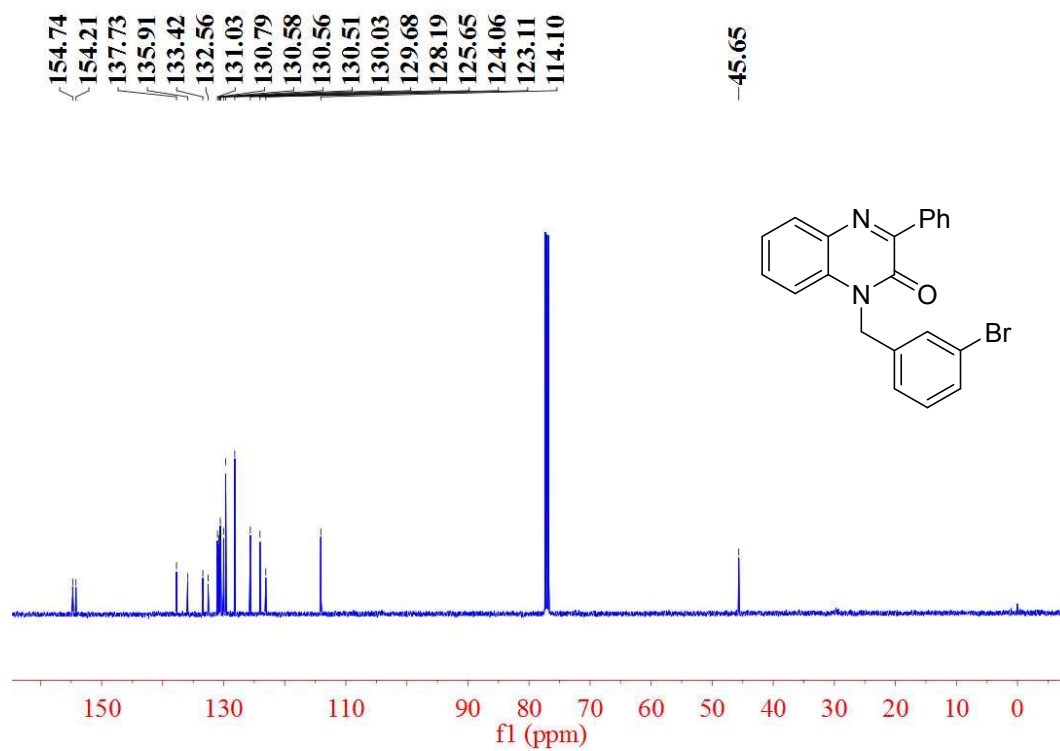



### 3an <sup>1</sup>H NMR

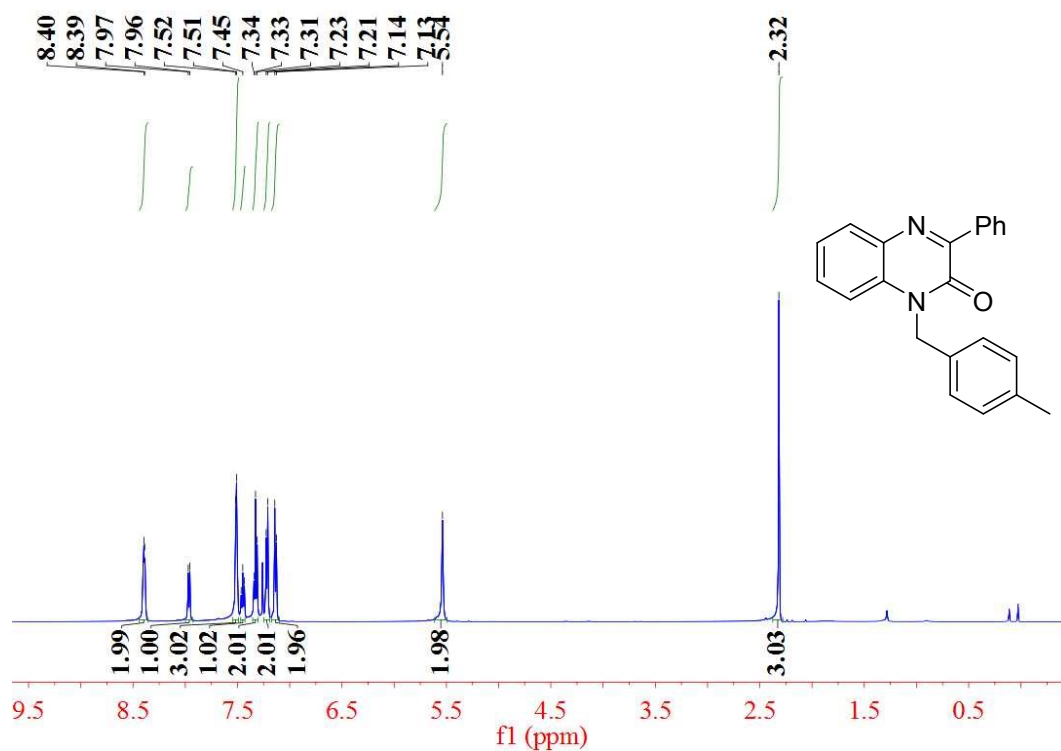

### 3an <sup>13</sup>C NMR

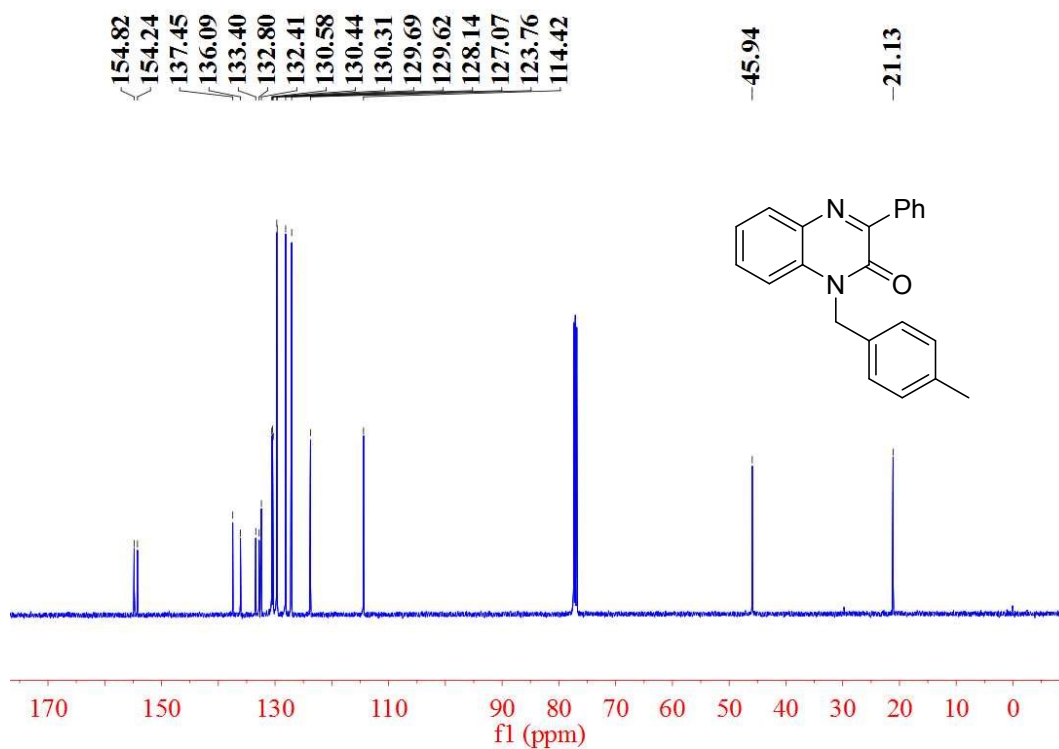

### 3ao <sup>1</sup>H NMR

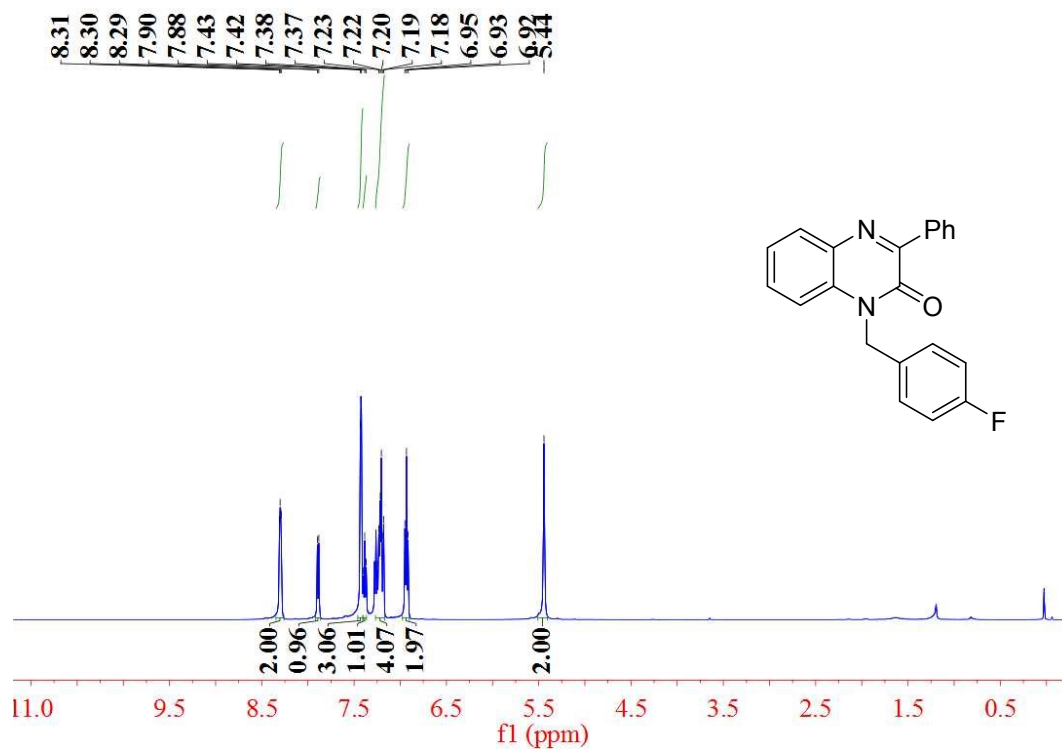

### 3ao <sup>13</sup>C NMR

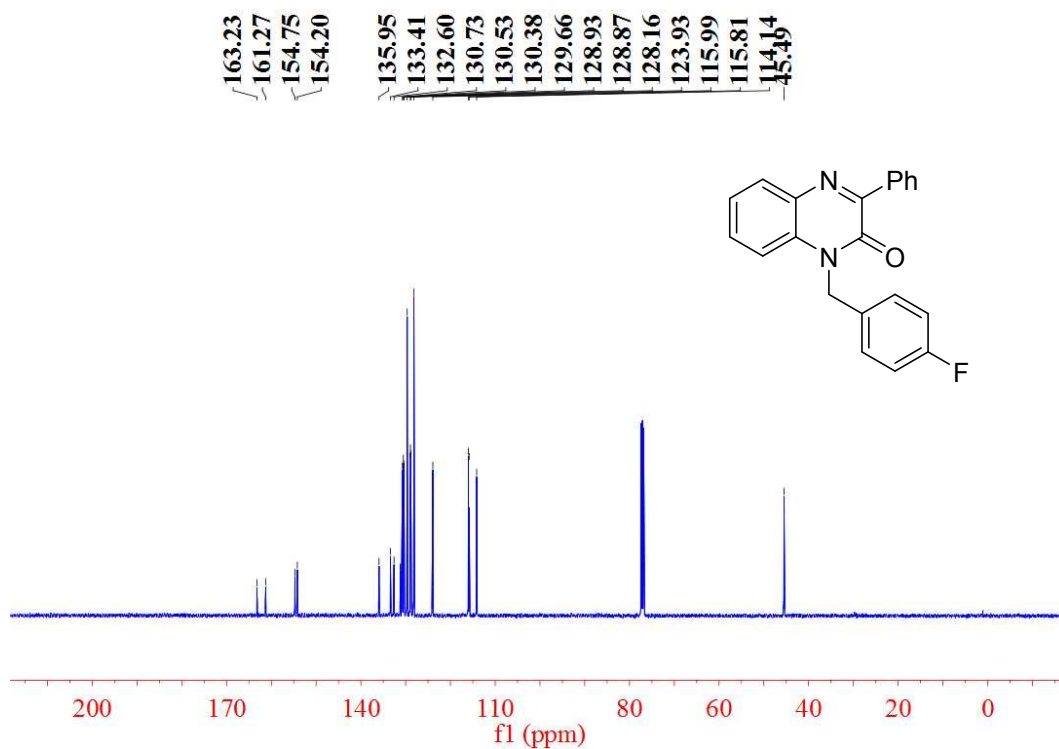

### 3ap <sup>1</sup>H NMR

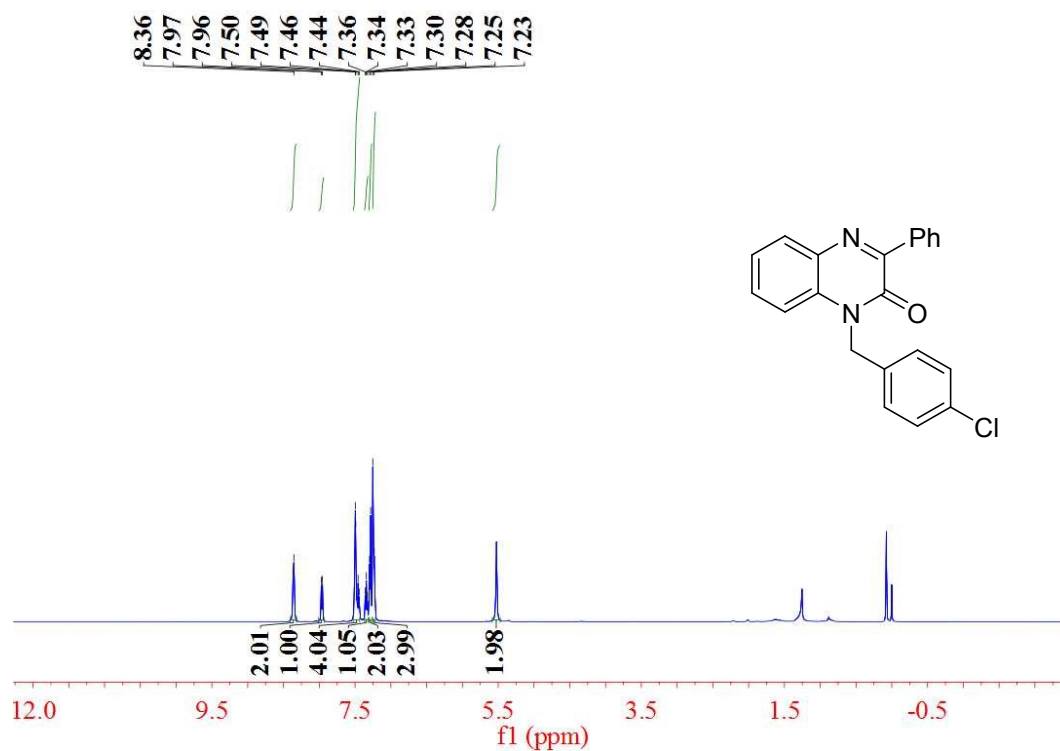

### 3ap <sup>13</sup>C NMR

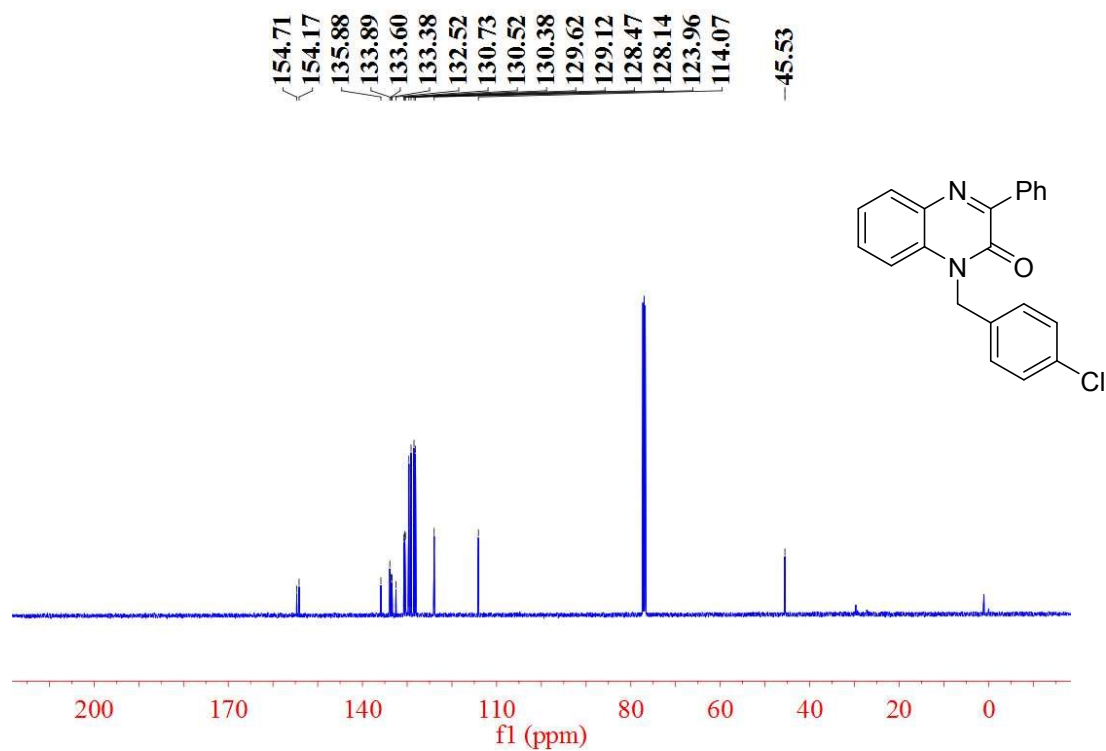

### 3aq <sup>1</sup>H NMR

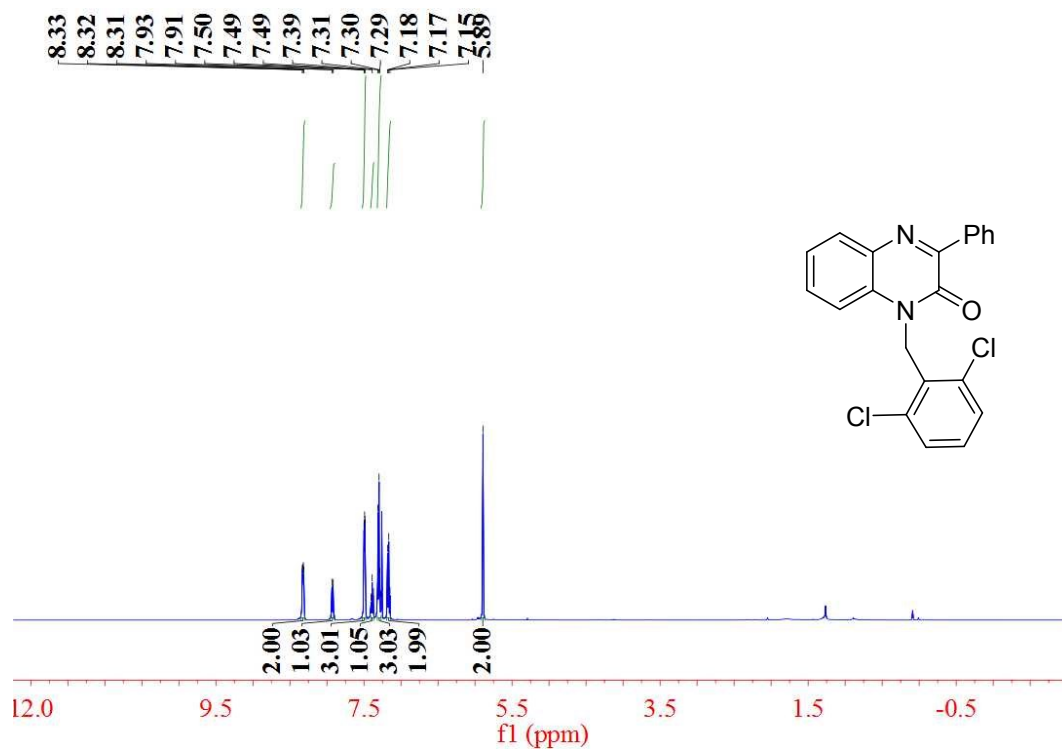

### 3aq <sup>13</sup>C NMR

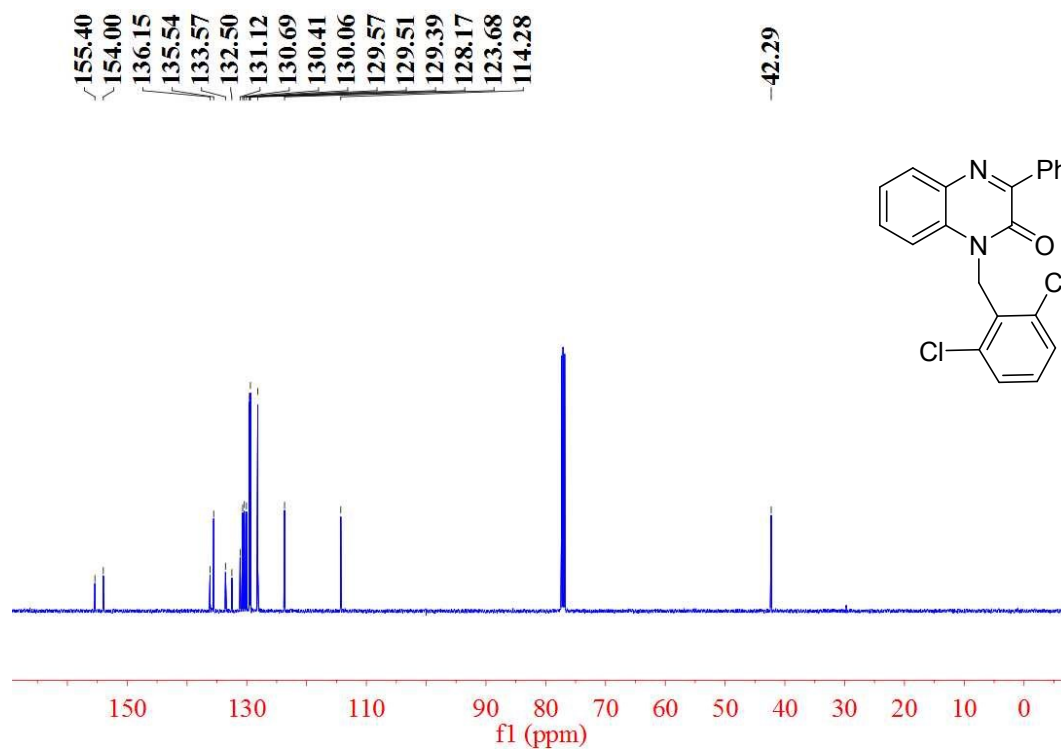

### 3ar <sup>1</sup>H NMR

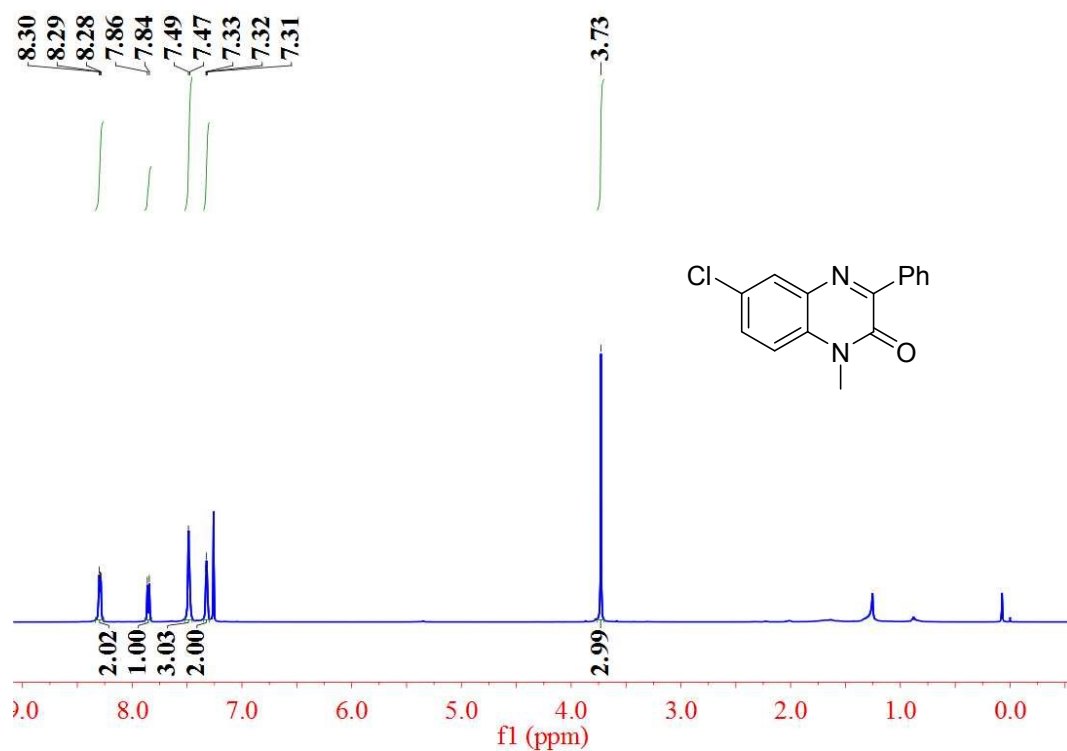

### 3ar <sup>13</sup>C NMR

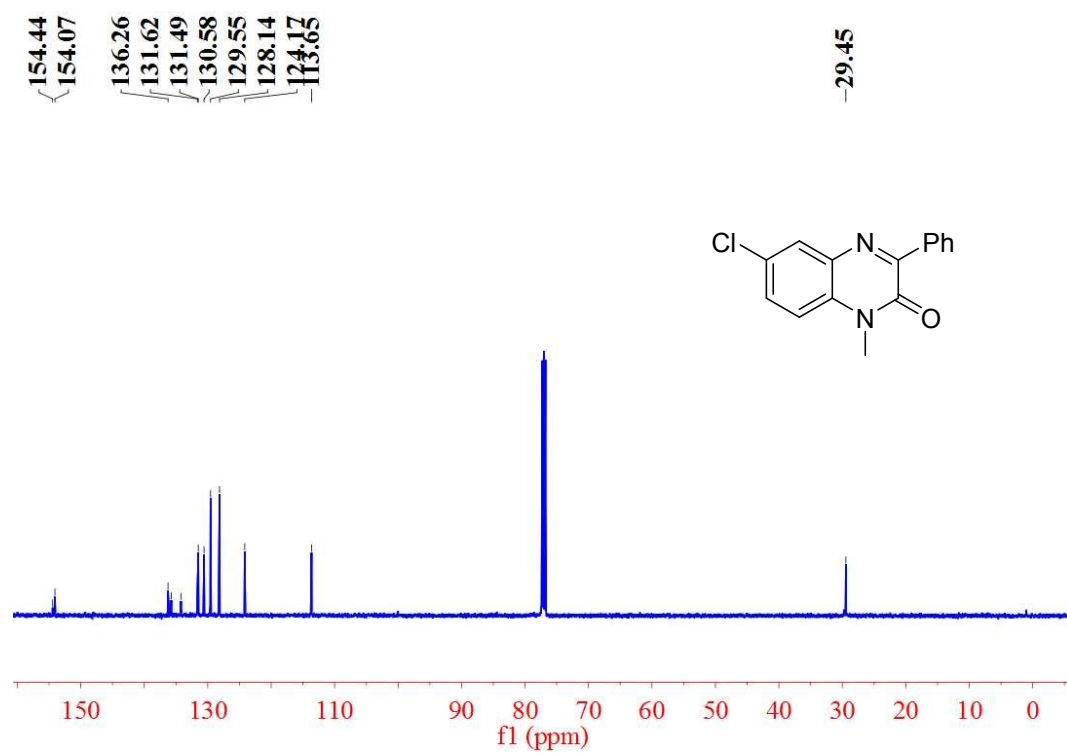

### 3as <sup>1</sup>H NMR

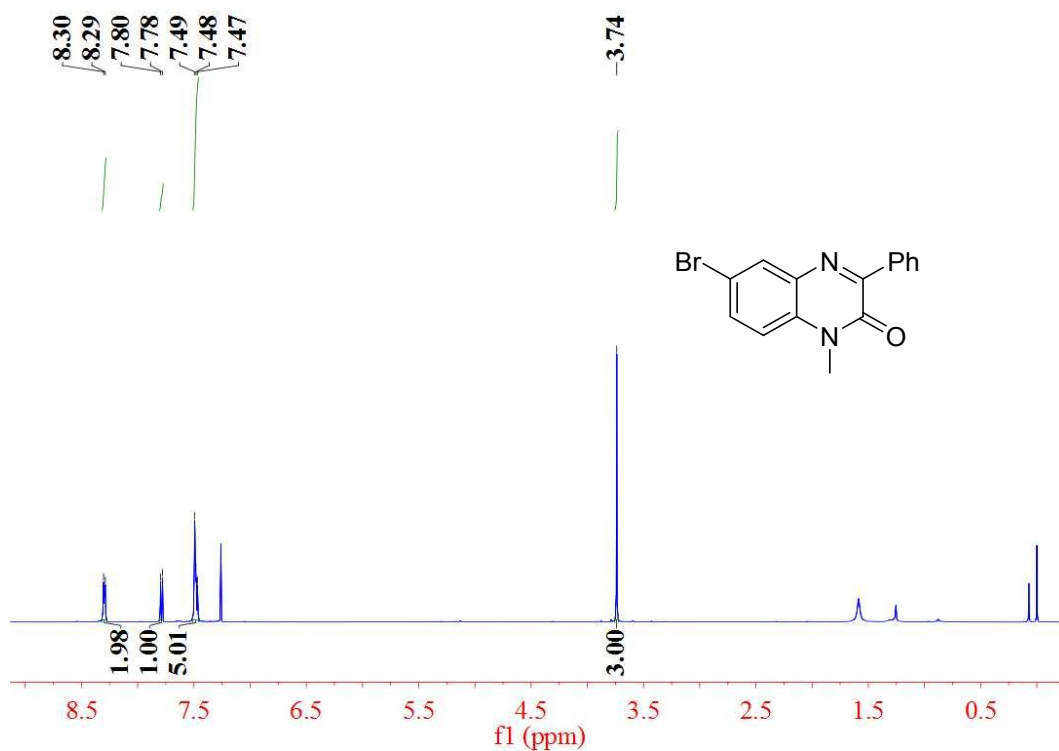

### 3as <sup>13</sup>C NMR

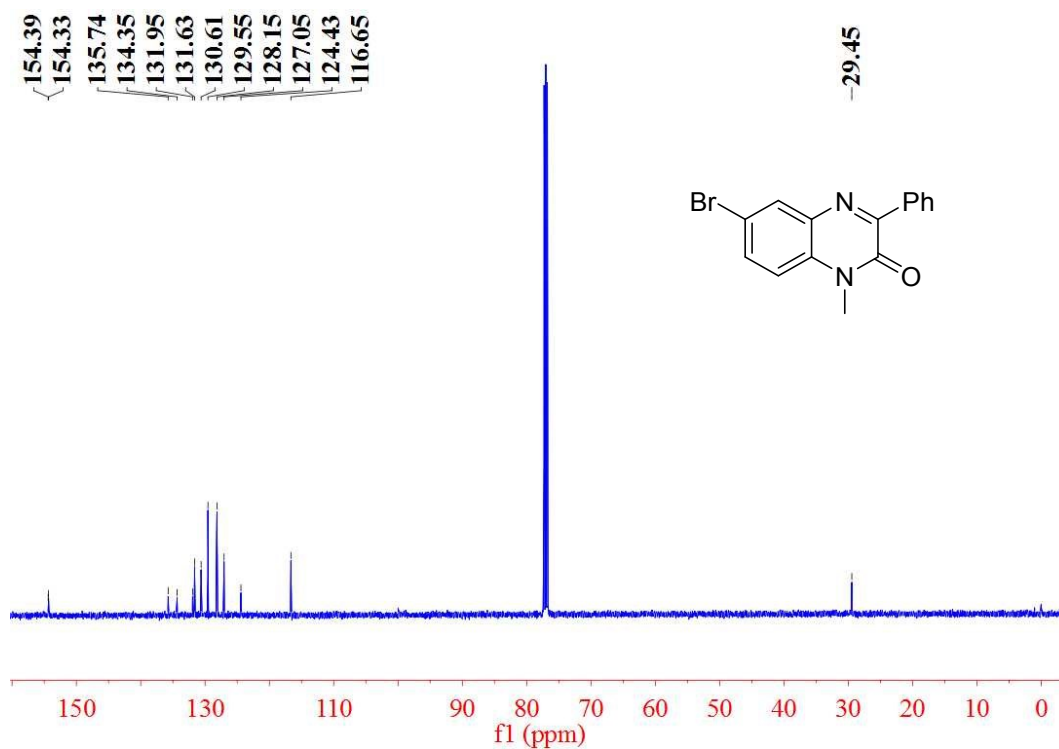

### 3at <sup>1</sup>H NMR

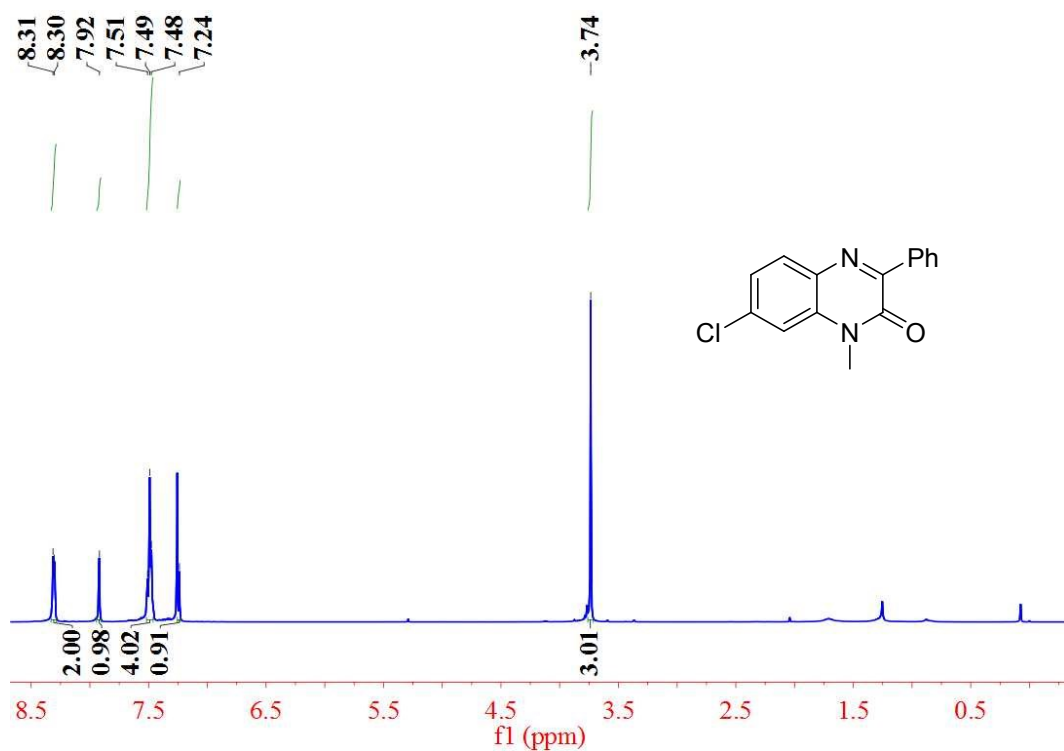

### 3at <sup>13</sup>C NMR

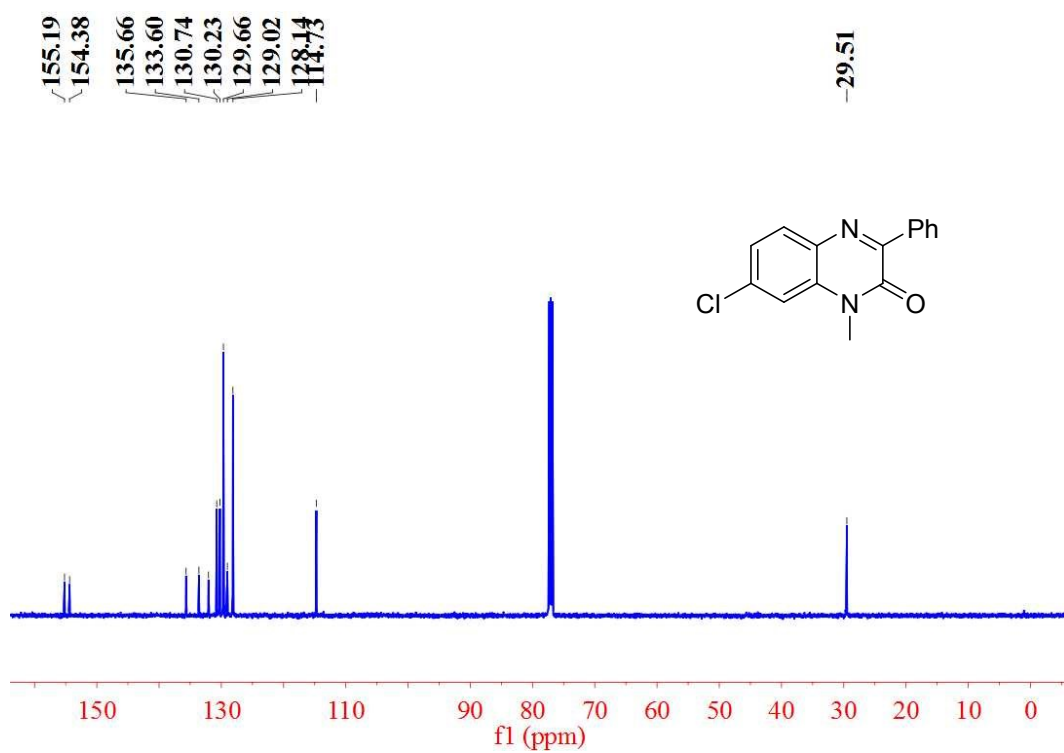

### 3au <sup>1</sup>H NMR

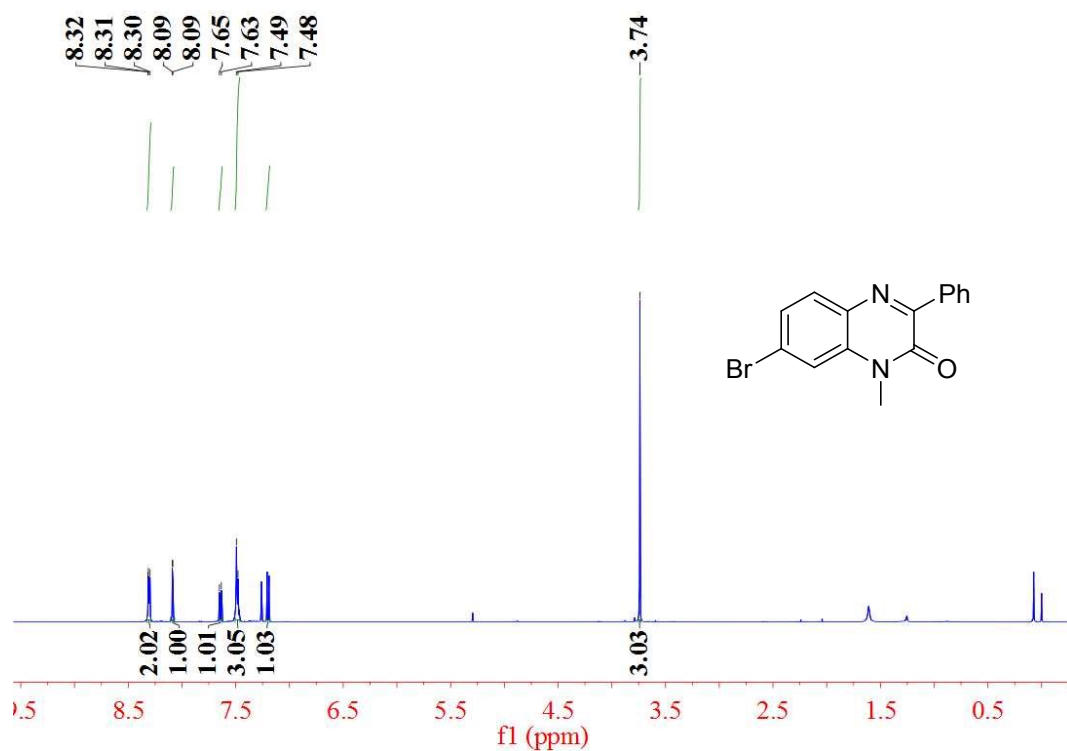

### 3au <sup>13</sup>C NMR

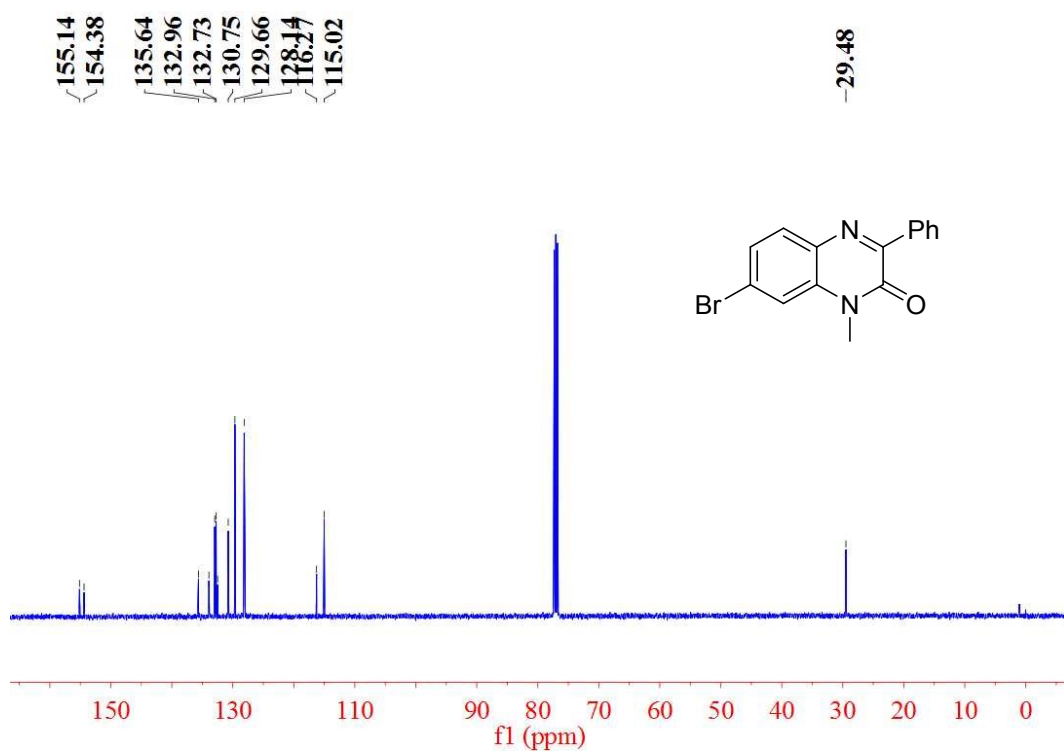



### 3av <sup>1</sup>H NMR

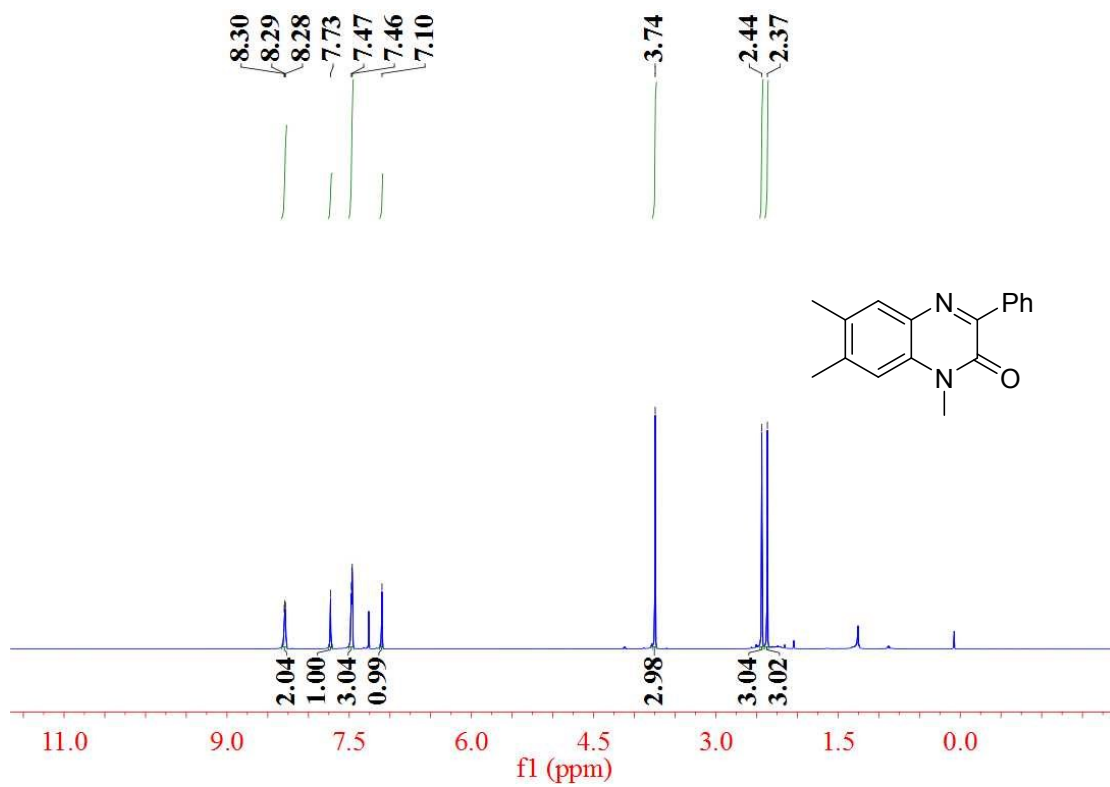

### 3av <sup>13</sup>C NMR

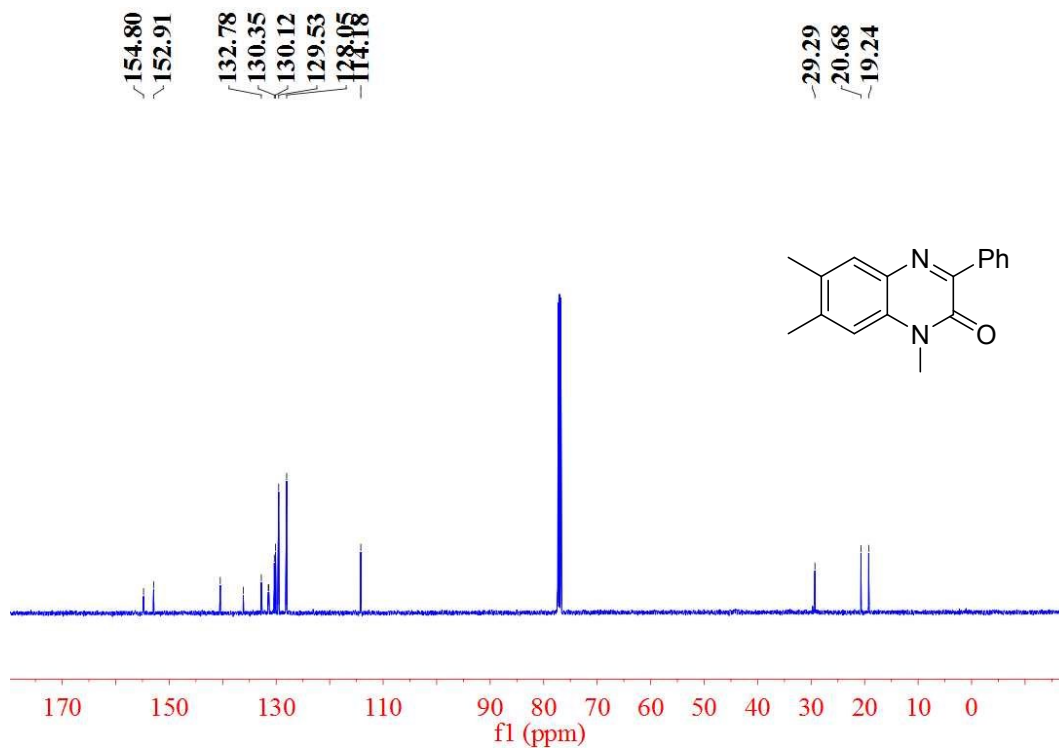

### 3aw <sup>1</sup>H NMR

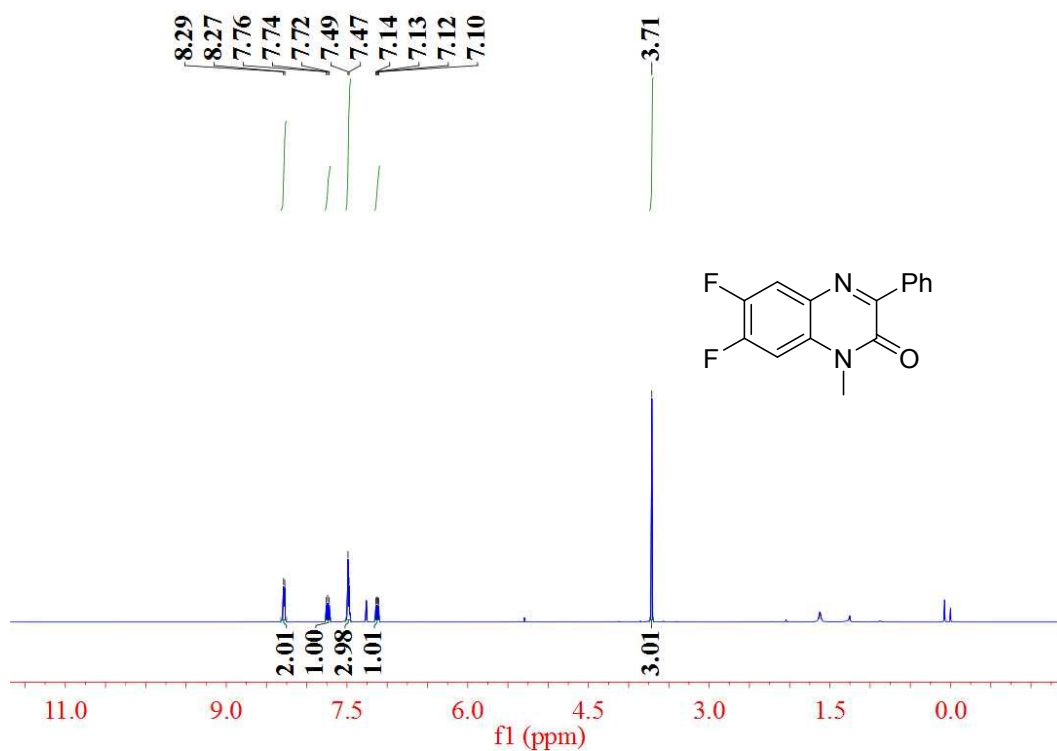

### 3aw <sup>13</sup>C NMR

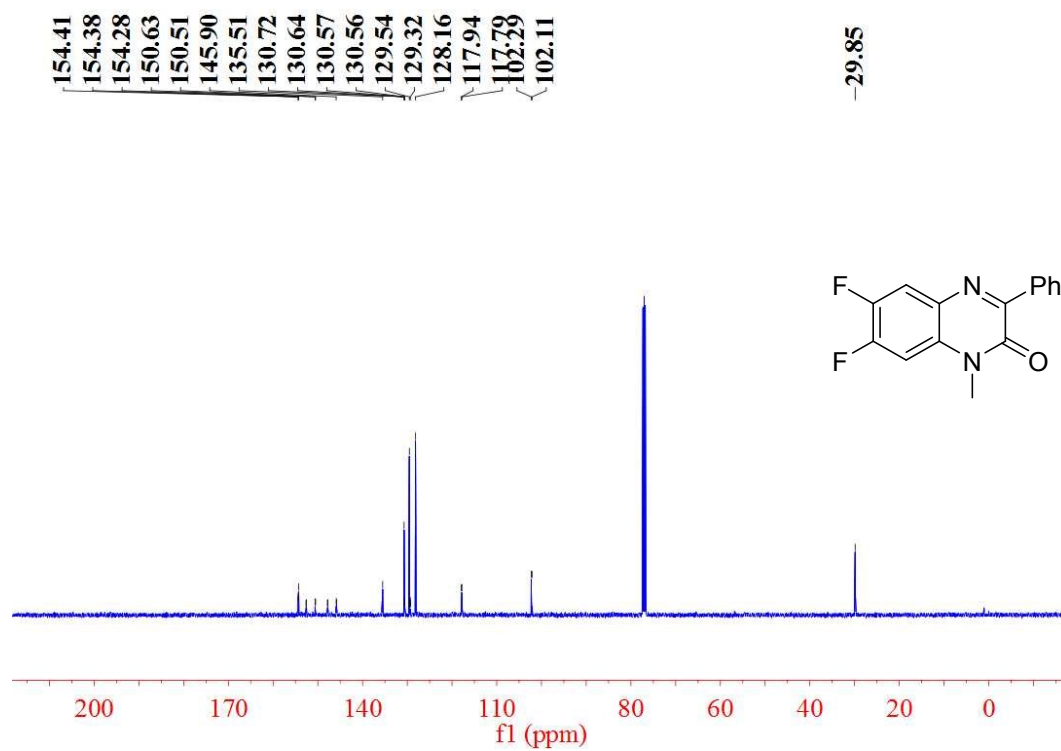

### 3ax <sup>1</sup>H NMR

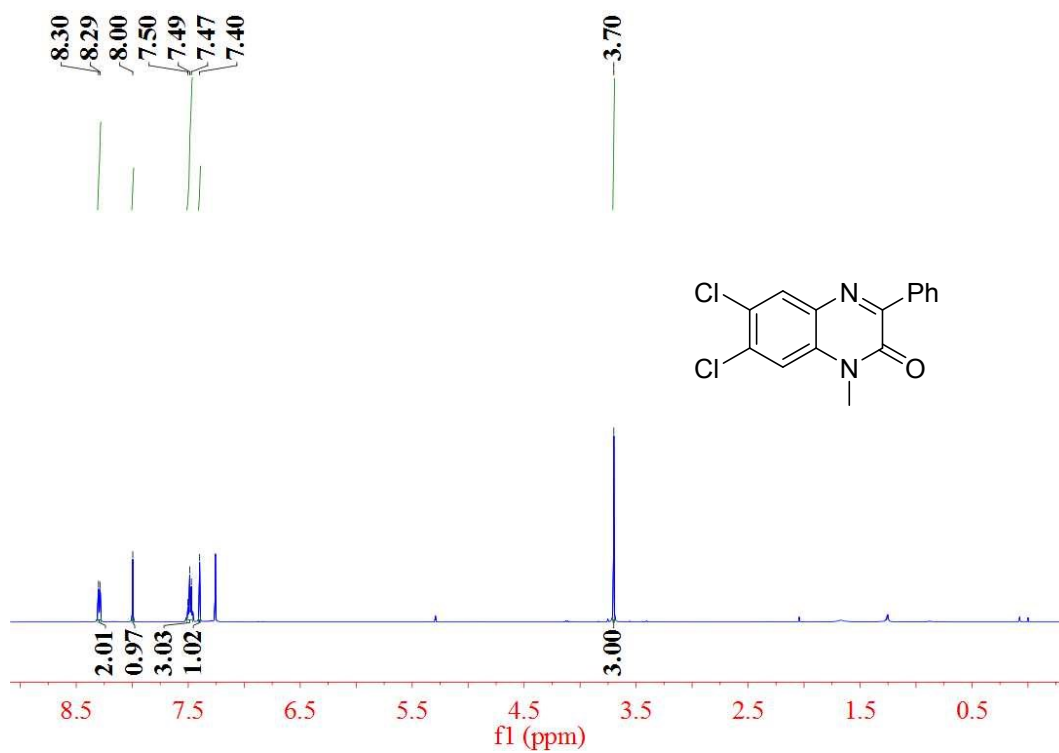

### 3ax <sup>13</sup>C NMR

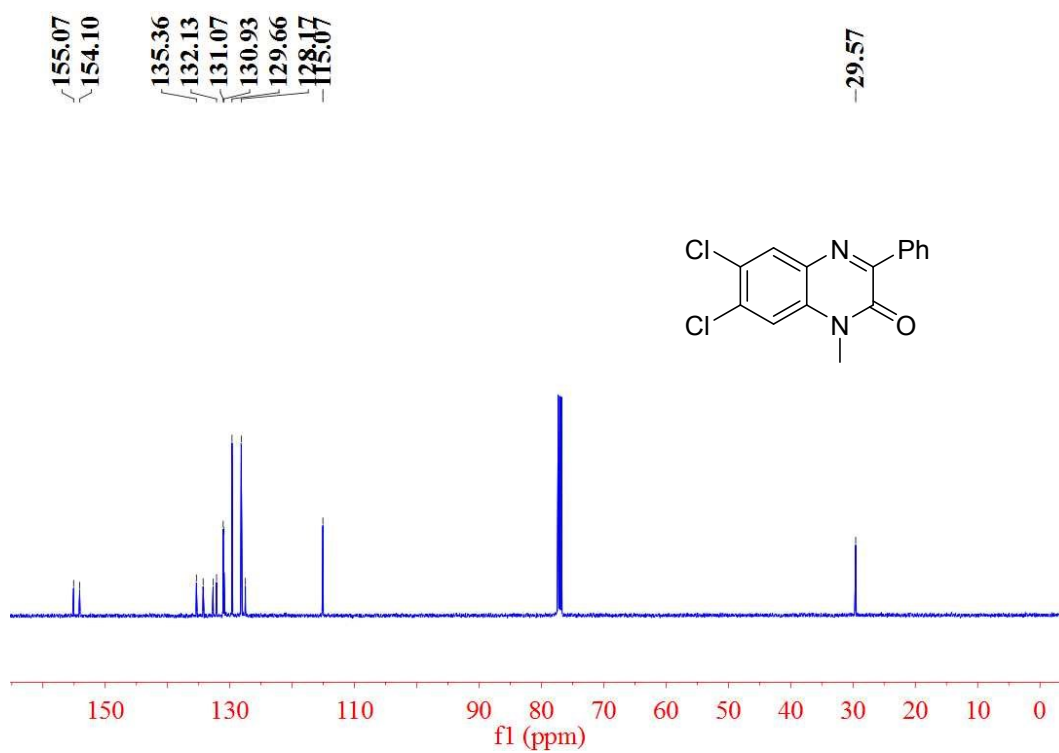

### 3ba <sup>1</sup>H NMR

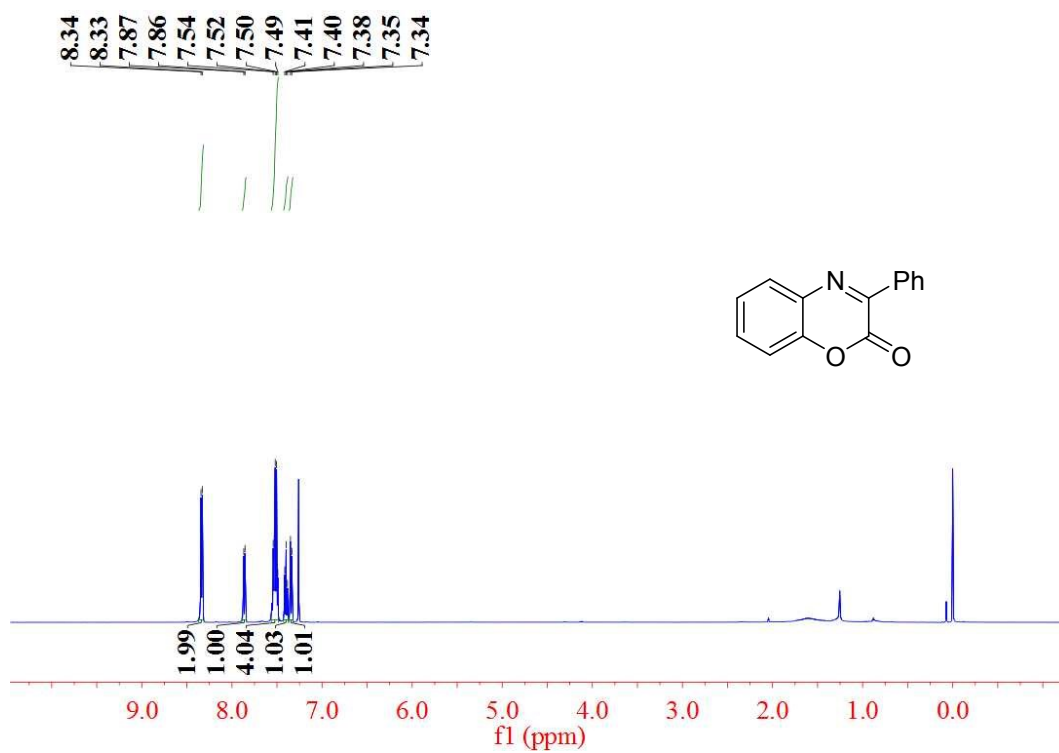

### 3ba <sup>13</sup>C NMR

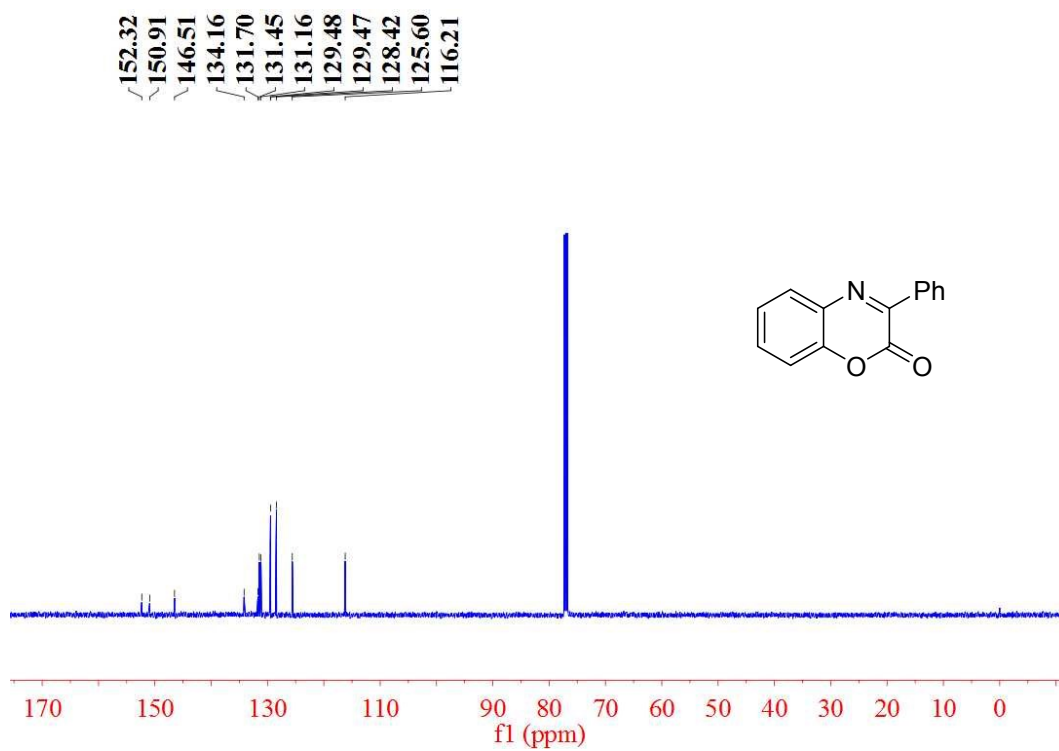

### 3bb <sup>1</sup>H NMR

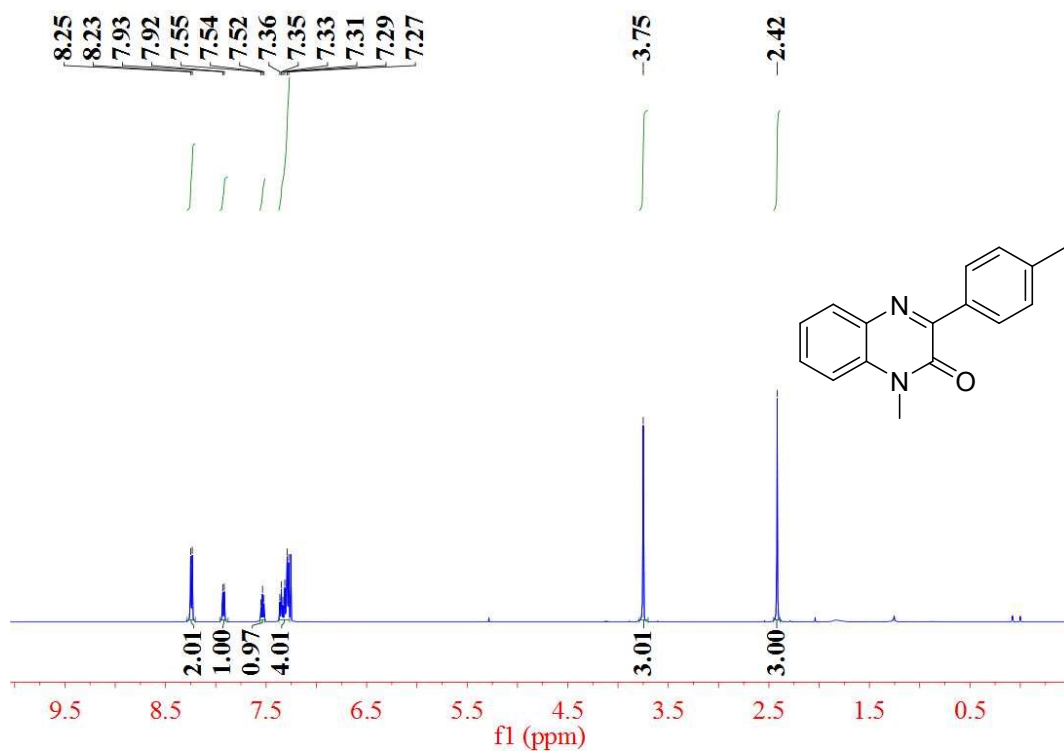

### 3bb <sup>13</sup>C NMR

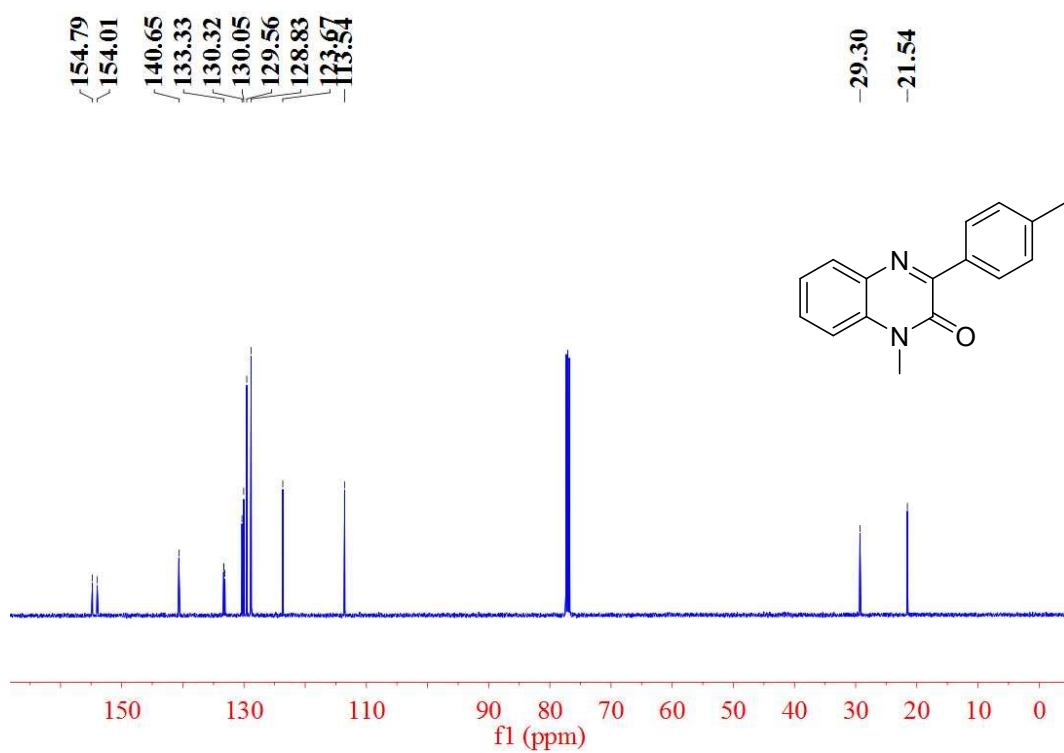

### 3bc <sup>1</sup>H NMR

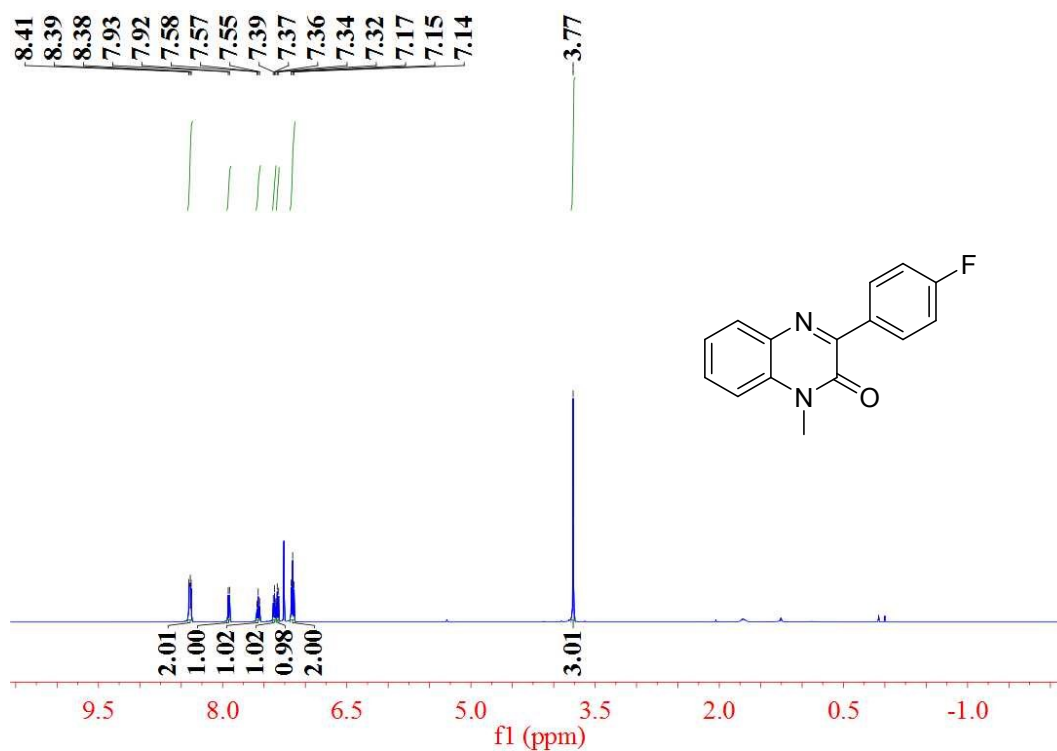

### 3bc <sup>13</sup>C NMR

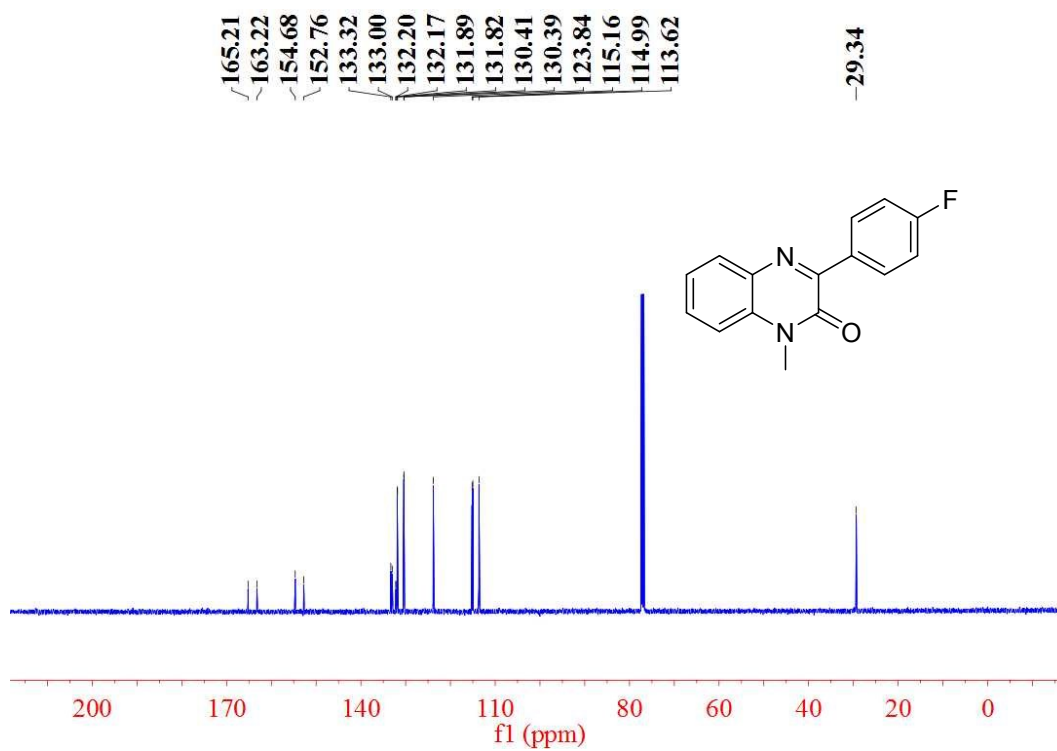

### 3bd <sup>1</sup>H NMR

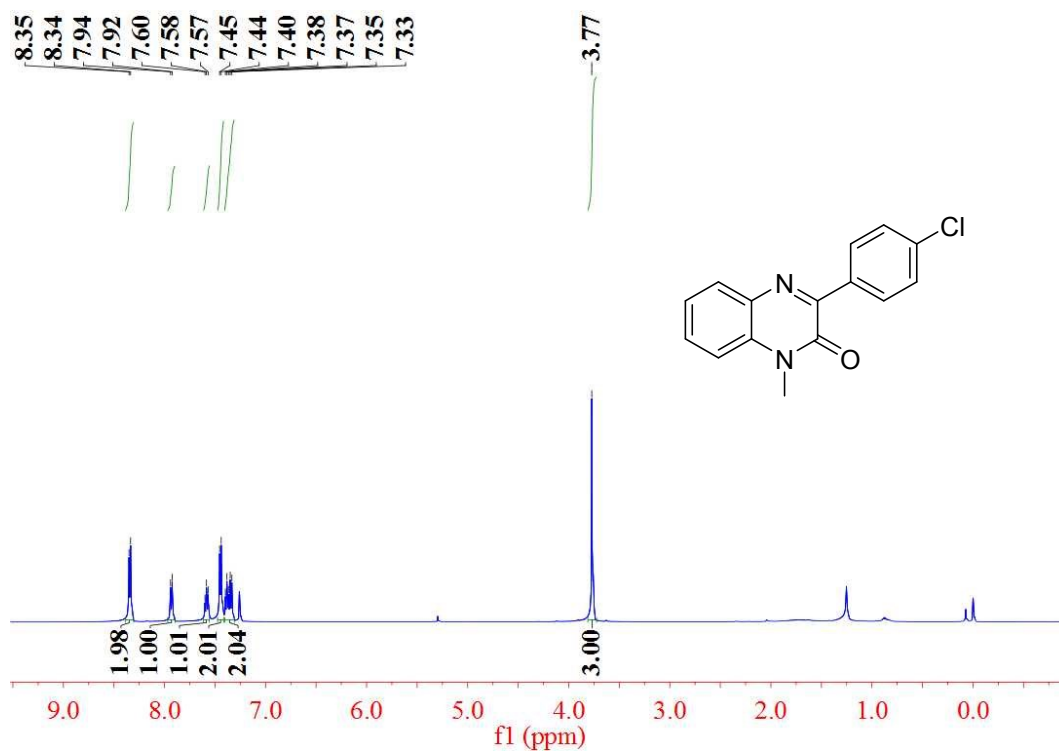

### 3bd <sup>13</sup>C NMR

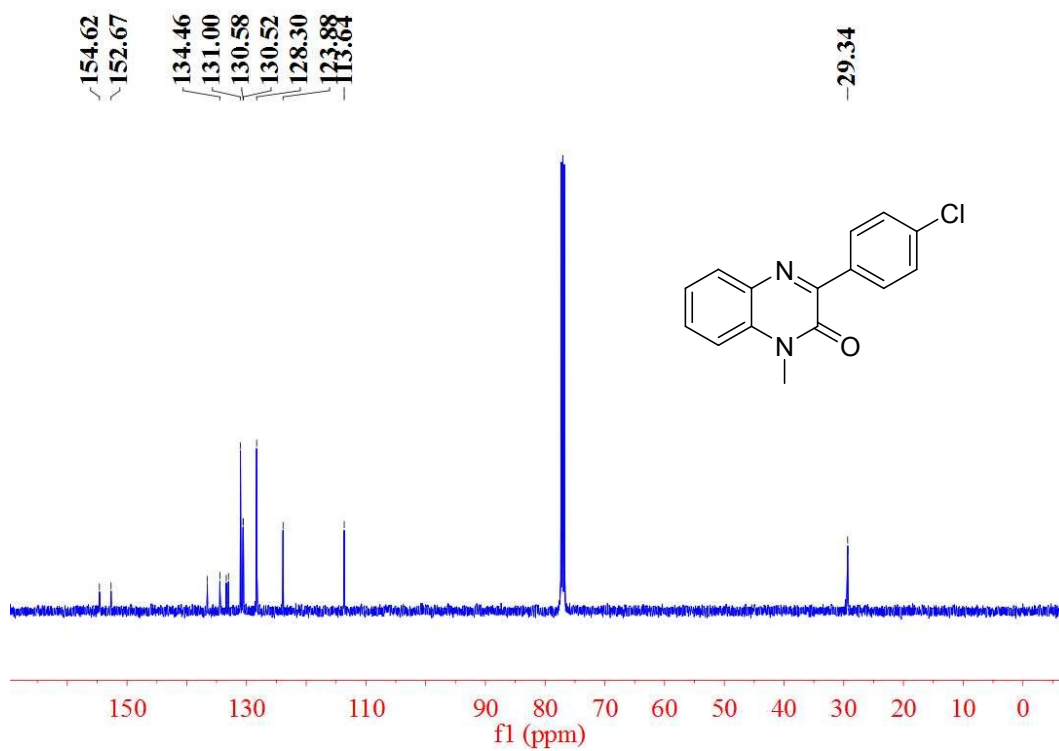

### 3be <sup>1</sup>H NMR

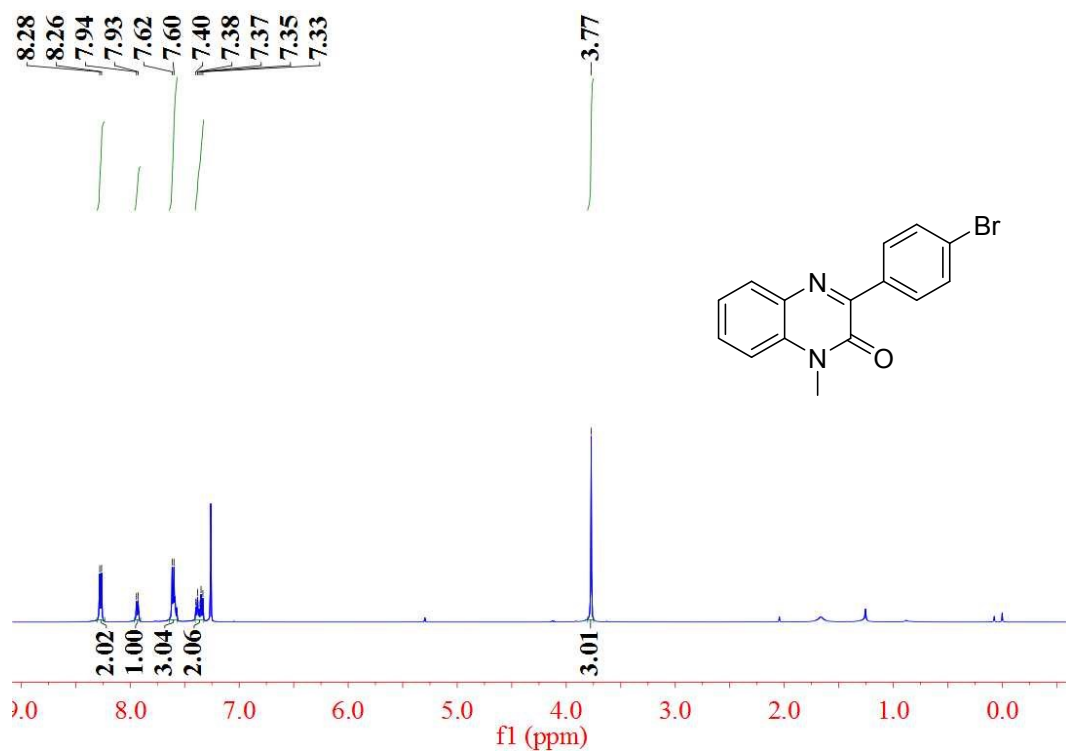

### 3be <sup>13</sup>C NMR

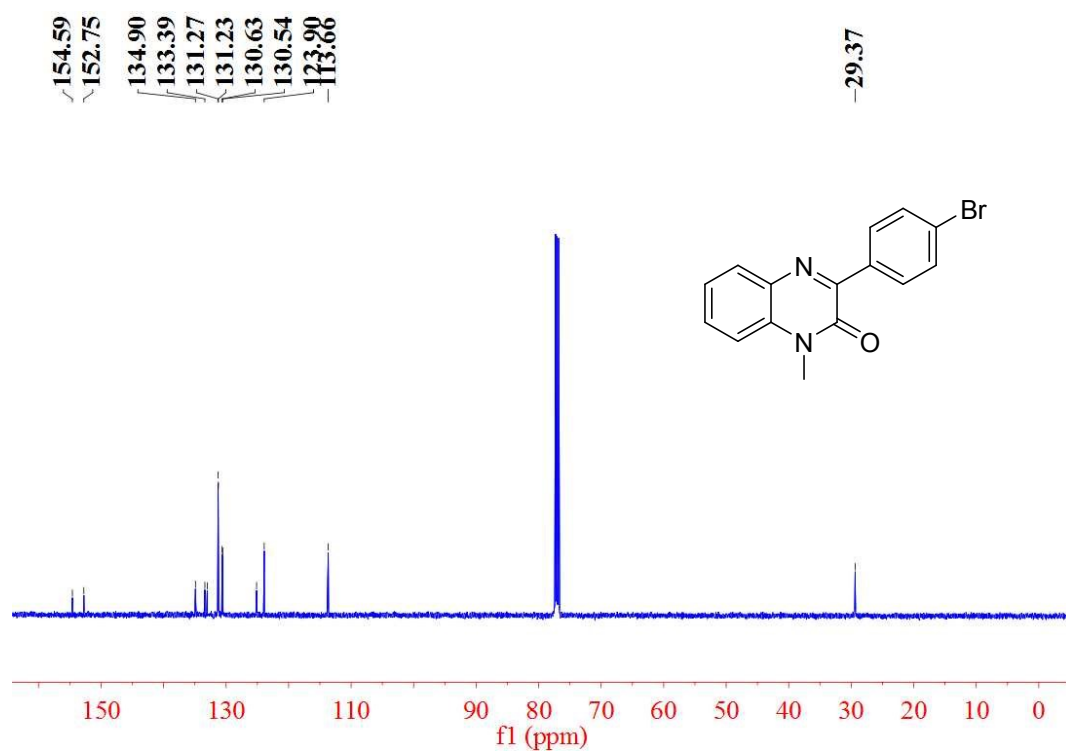



### 3bf <sup>1</sup>H NMR

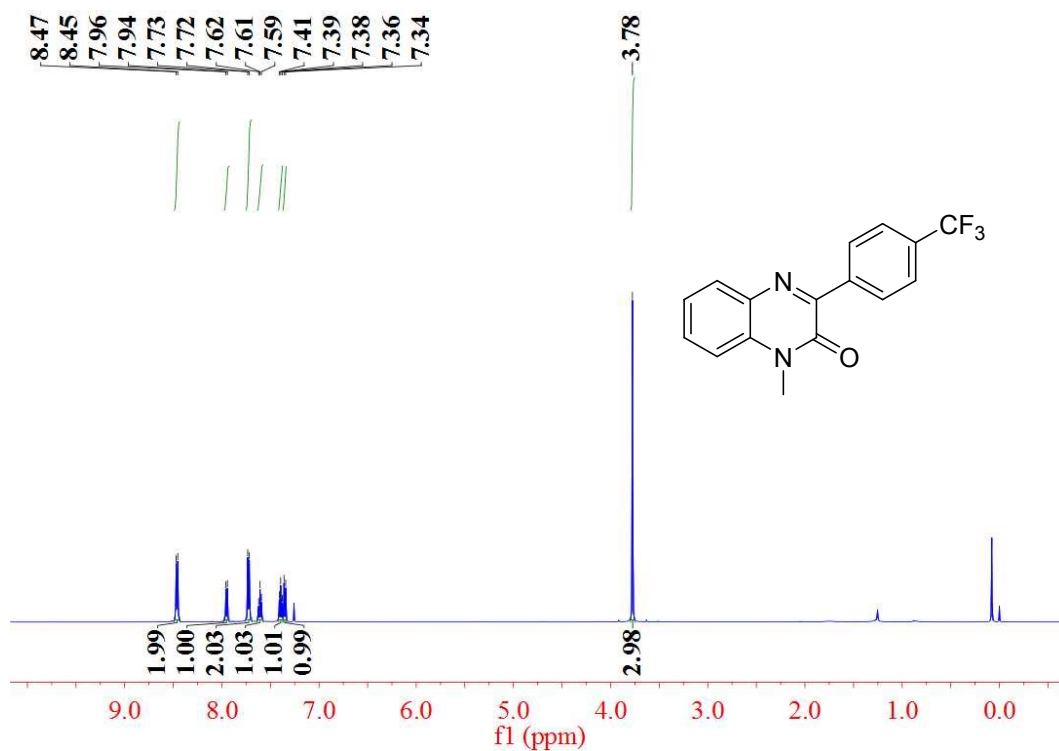

### 3bf <sup>13</sup>C NMR

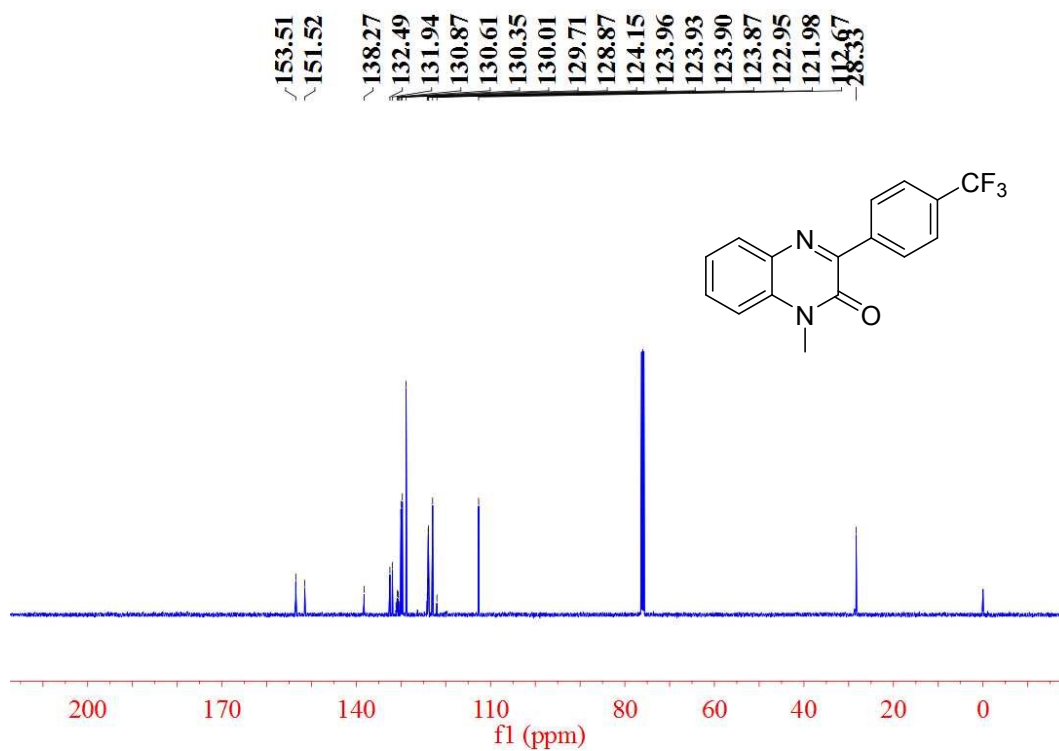

### 3bg <sup>1</sup>H NMR

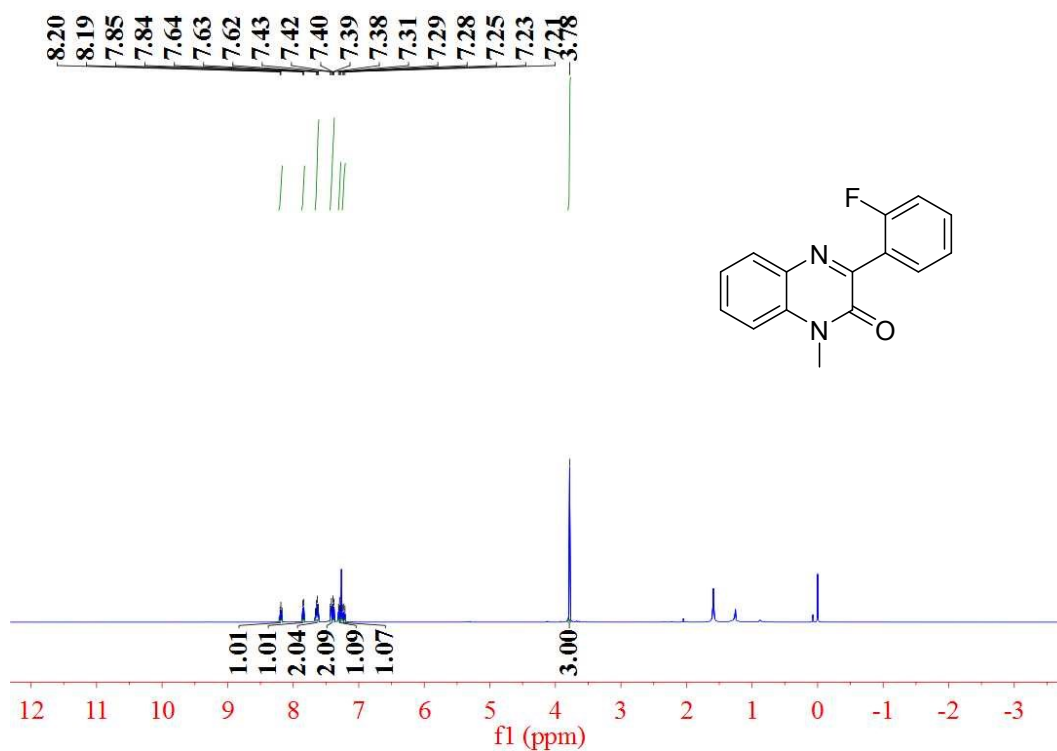

### 3bg <sup>13</sup>C NMR

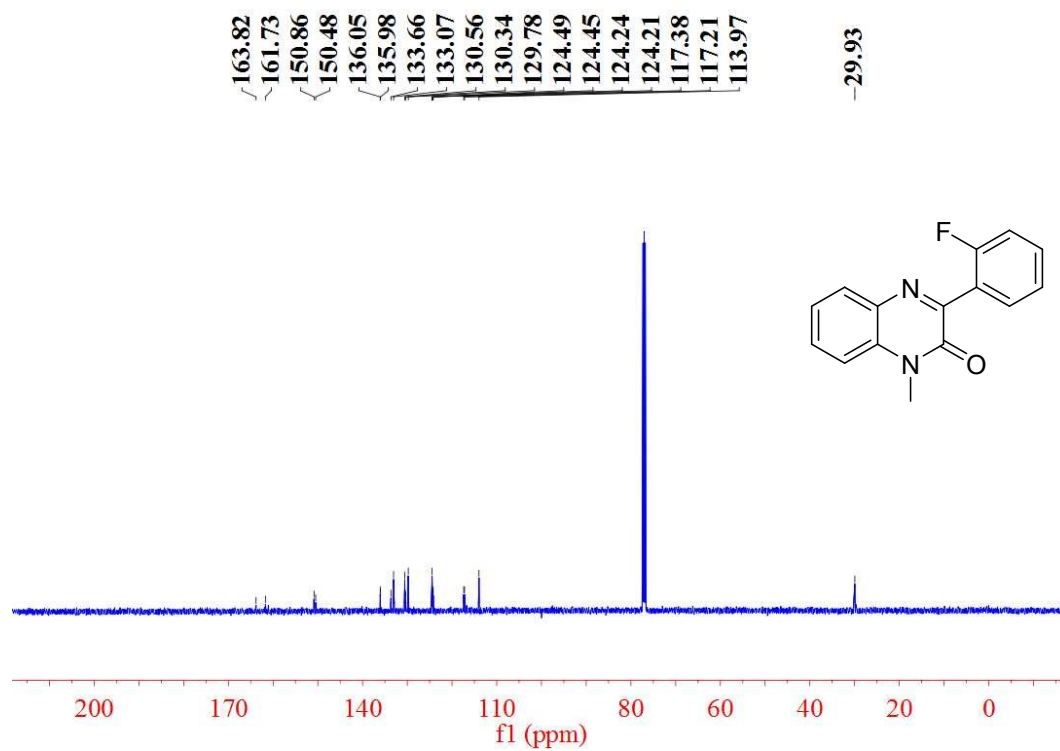

### 3bh <sup>1</sup>H NMR

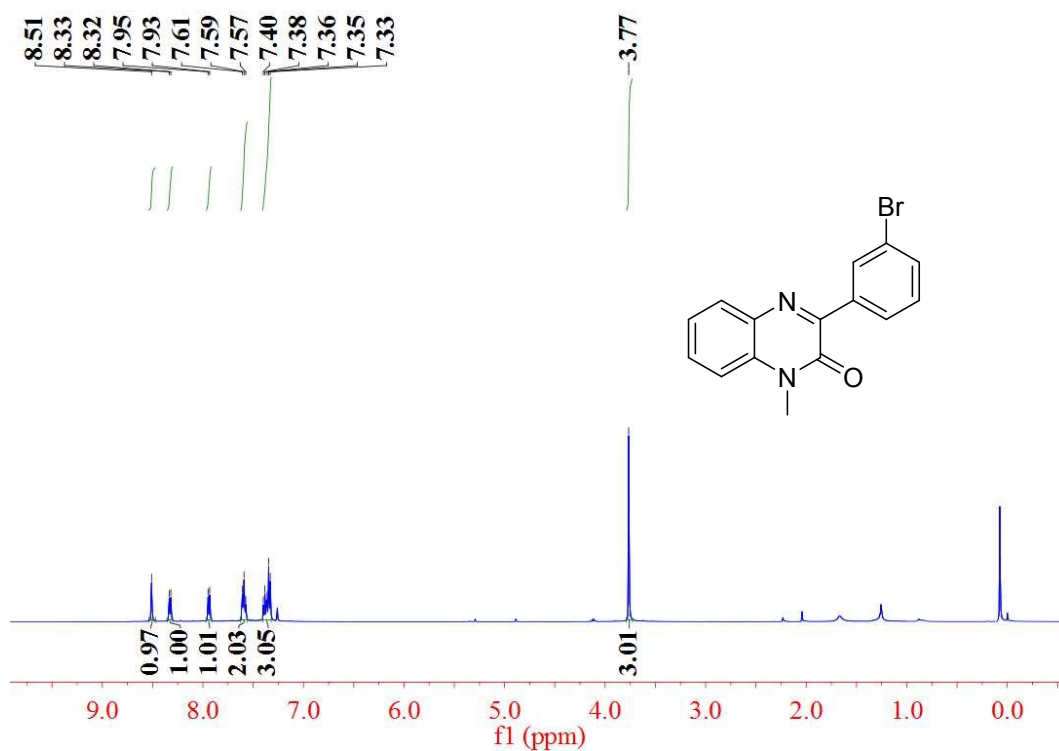

### 3bh <sup>13</sup>C NMR

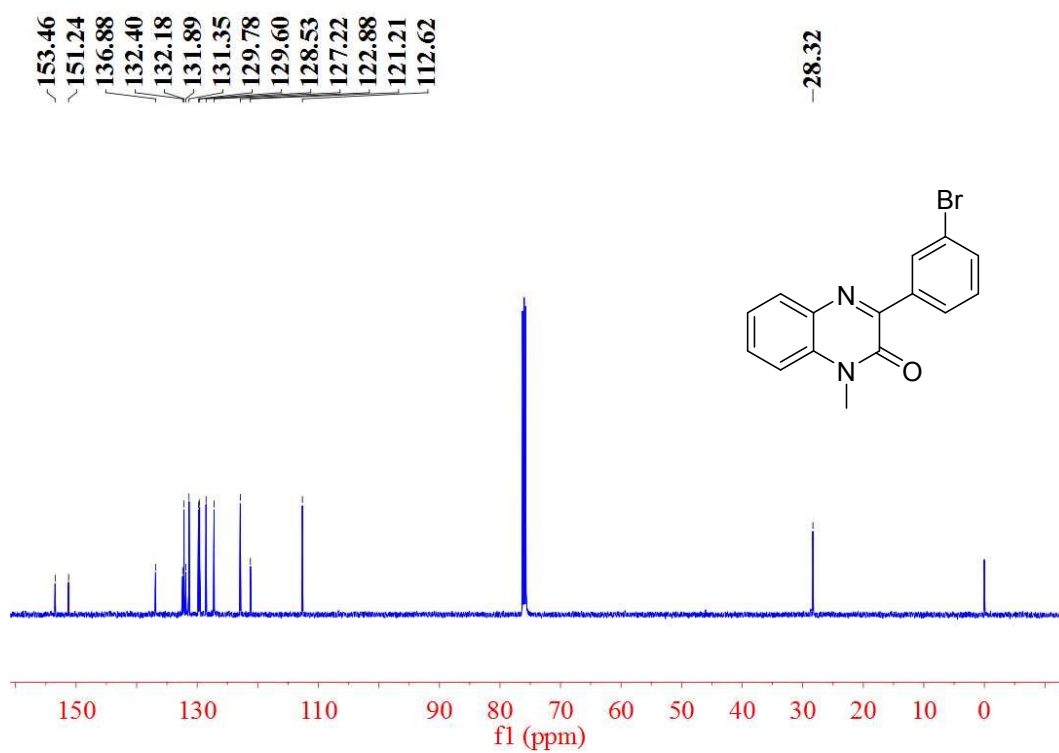

### 3bi <sup>1</sup>H NMR

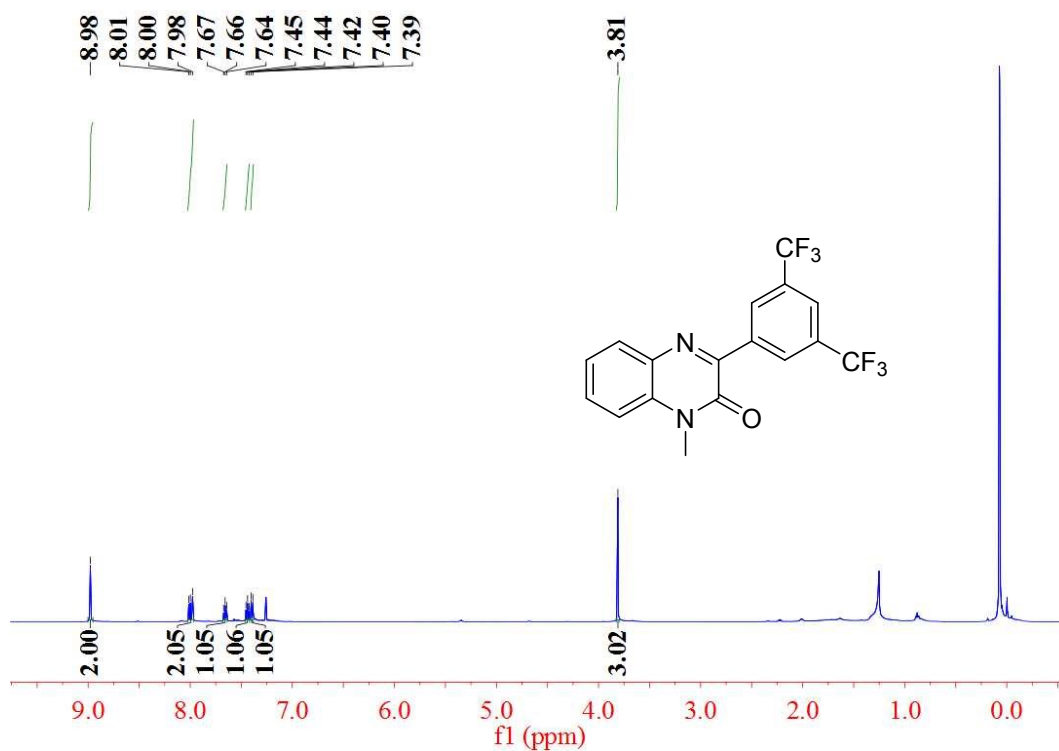

### 3bi <sup>13</sup>C NMR

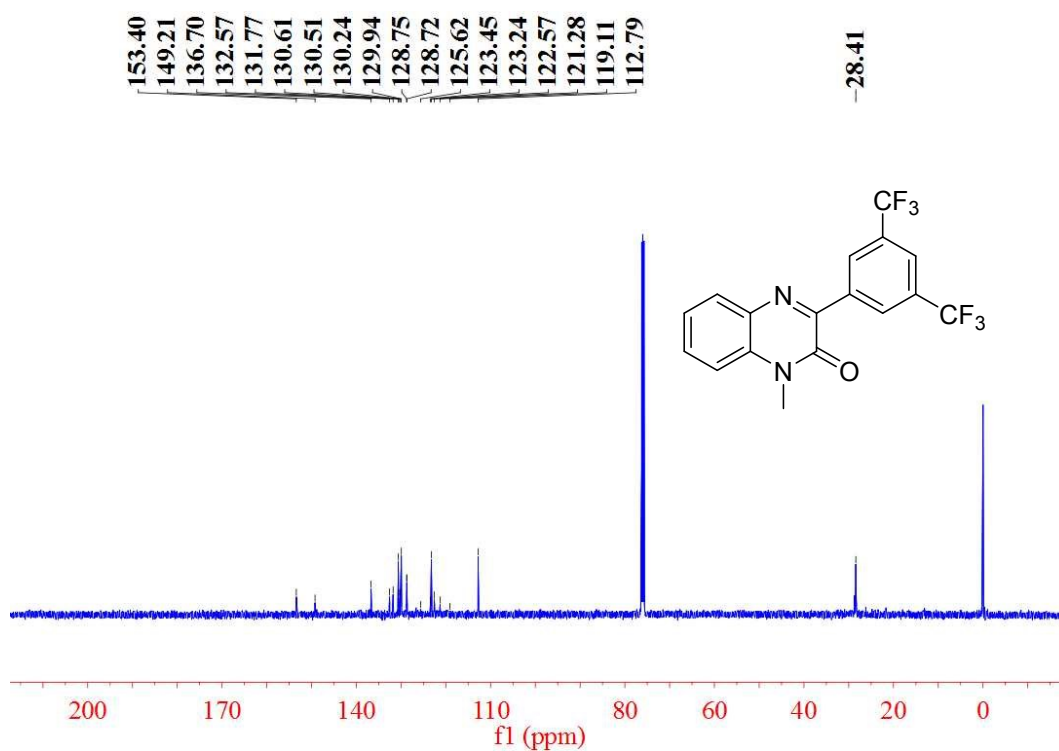

### 3bj <sup>1</sup>H NMR

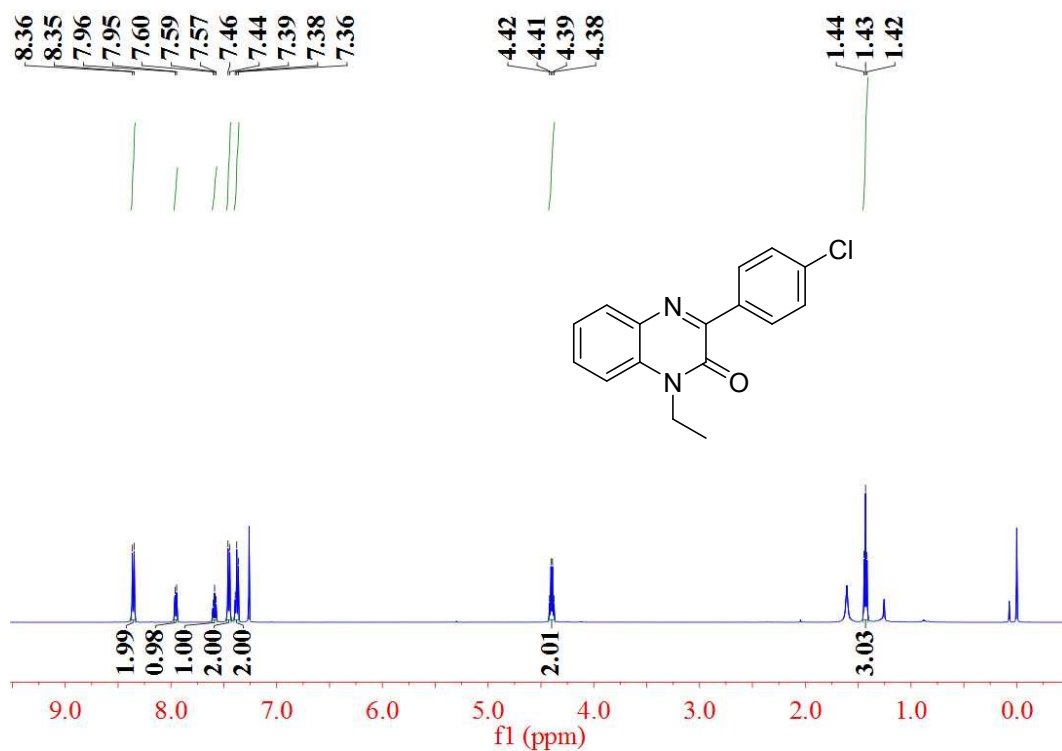

### 3bj <sup>13</sup>C NMR

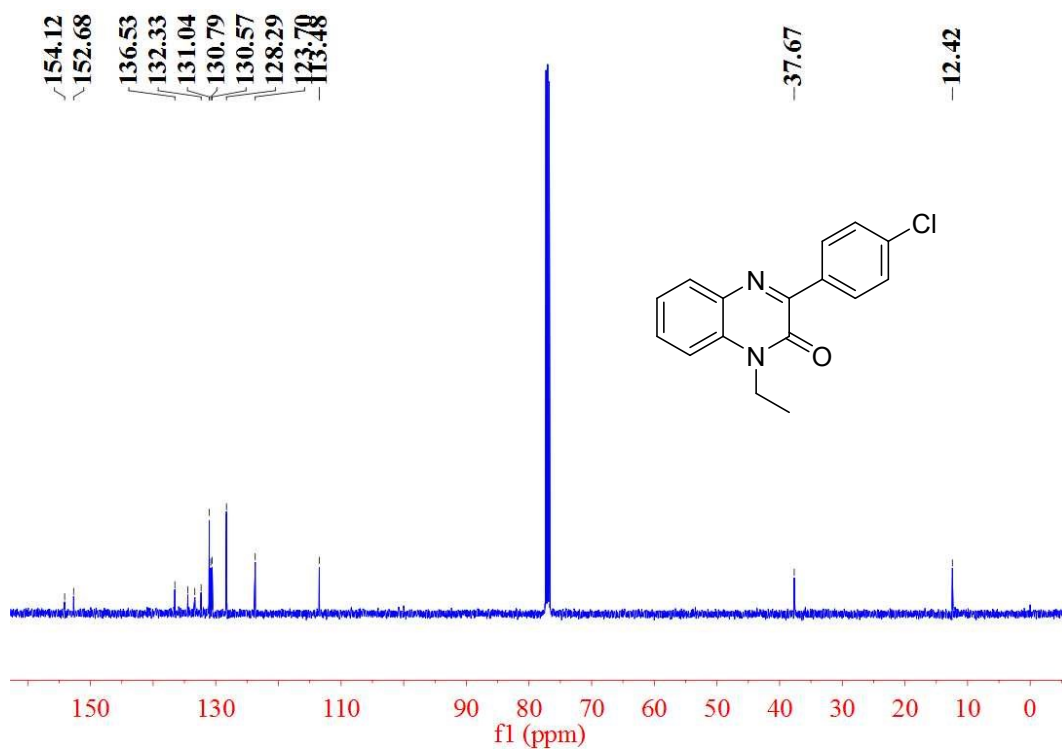

### 3bk <sup>1</sup>H NMR

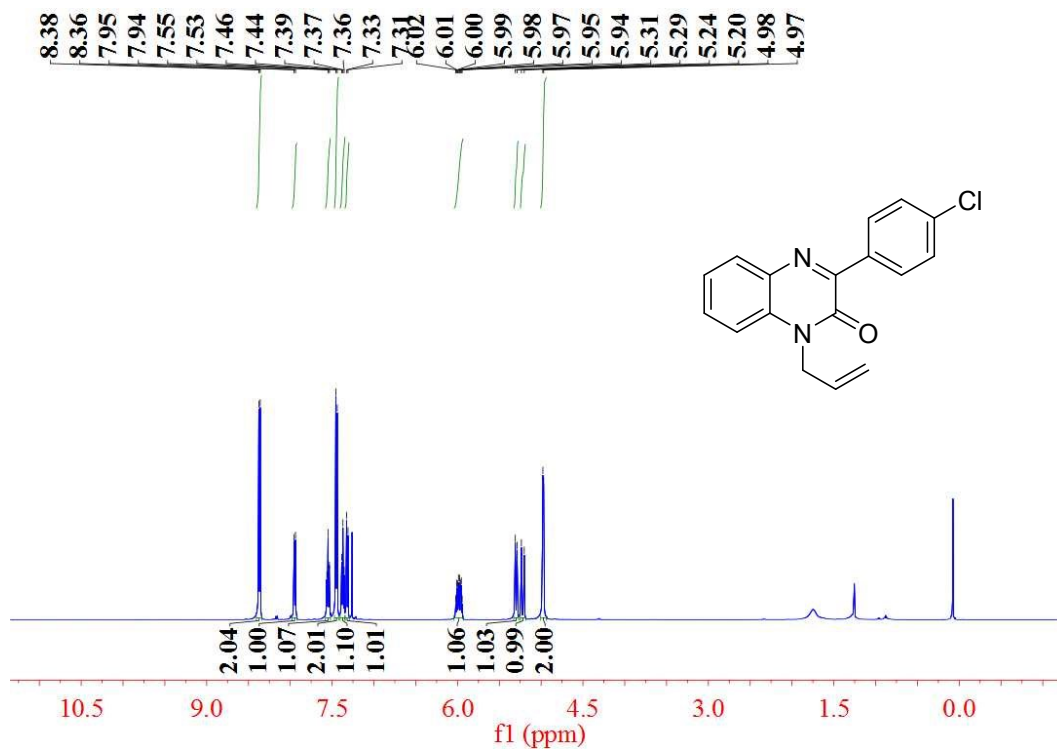

### 3bk <sup>13</sup>C NMR

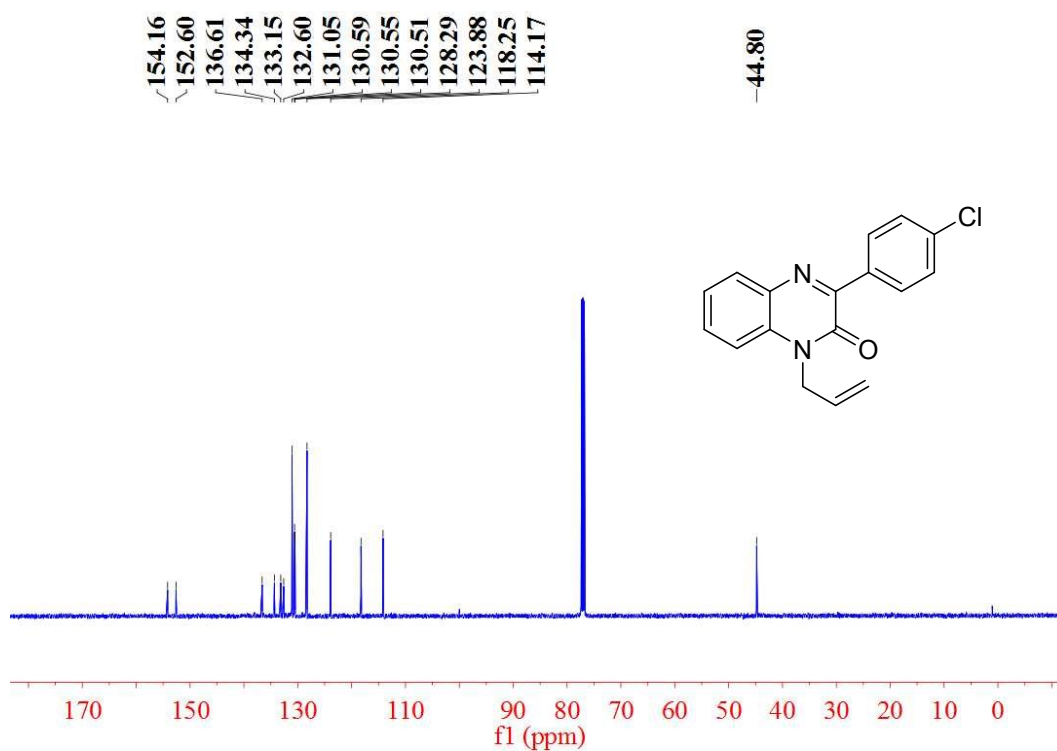

### 3b1 <sup>1</sup>H NMR

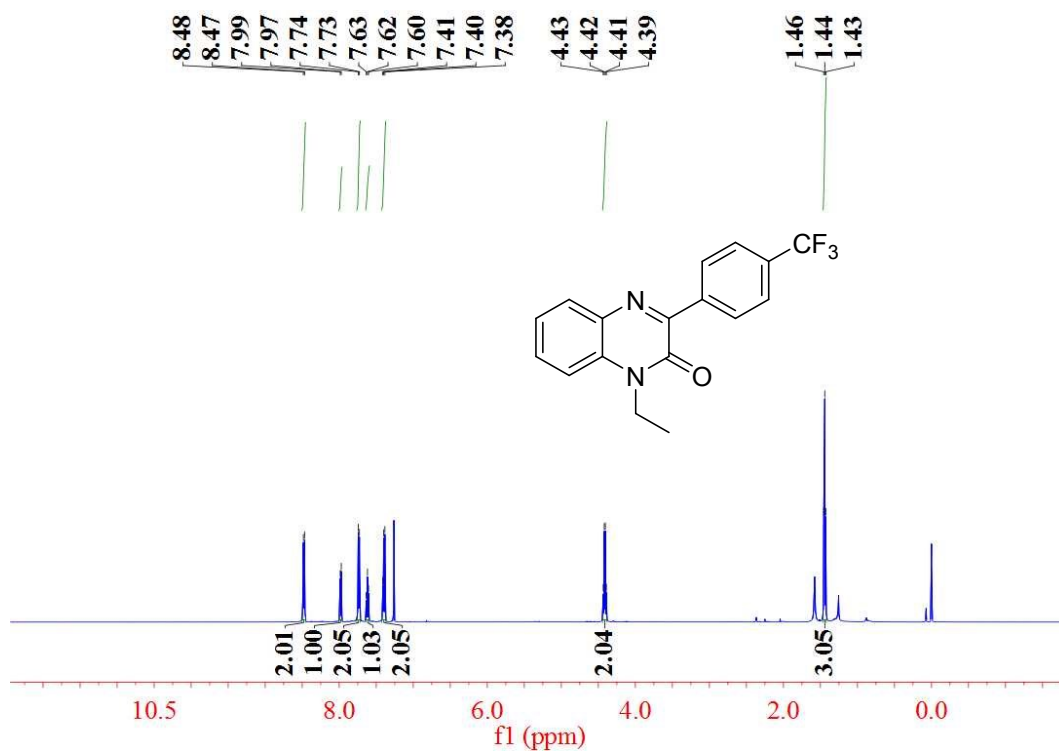

### 3b1 <sup>13</sup>C NMR

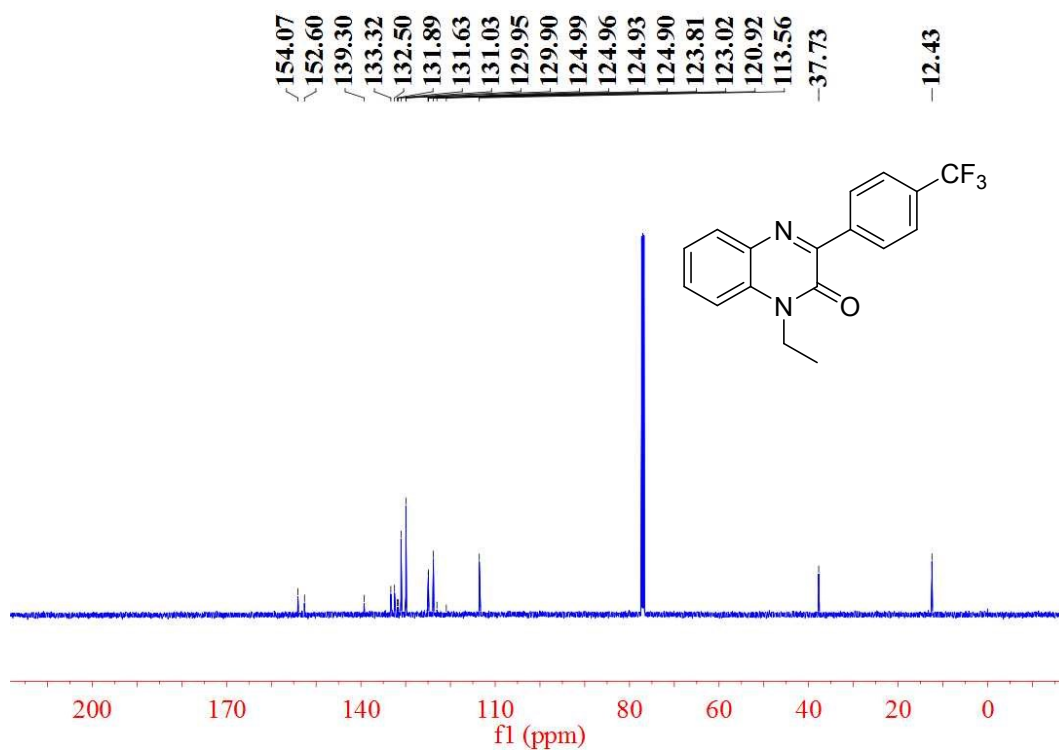

### 3bm <sup>1</sup>H NMR

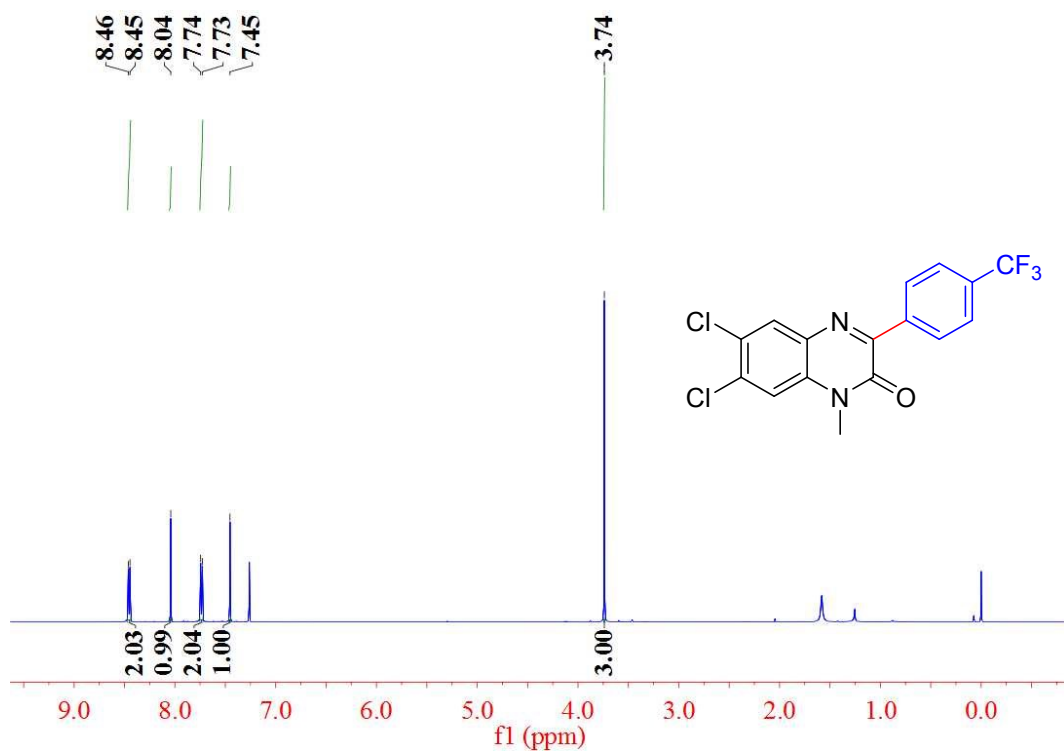

### 3bm <sup>13</sup>C NMR

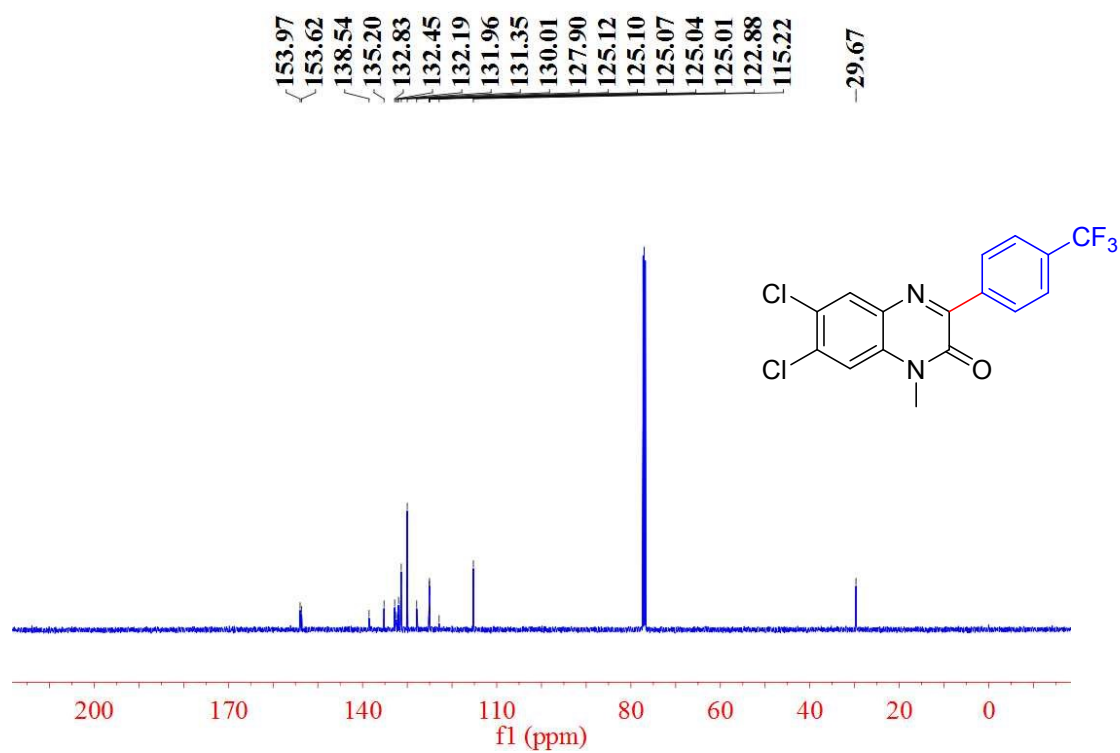



### 3bn <sup>1</sup>H NMR

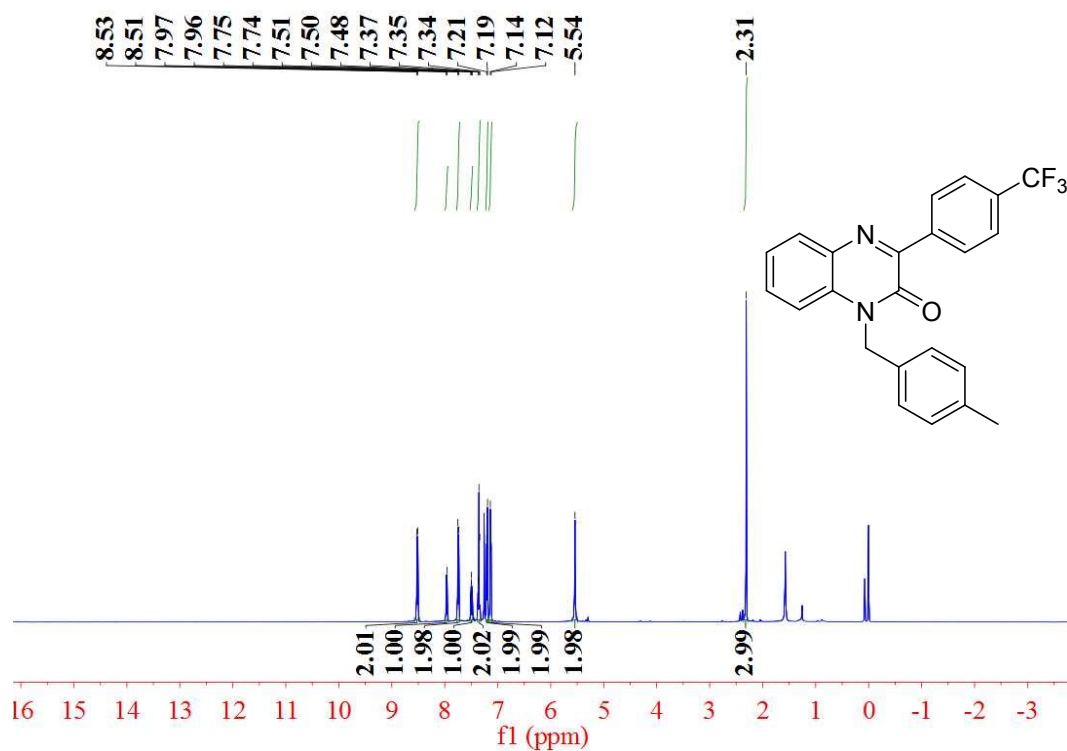

### 3bn <sup>13</sup>C NMR

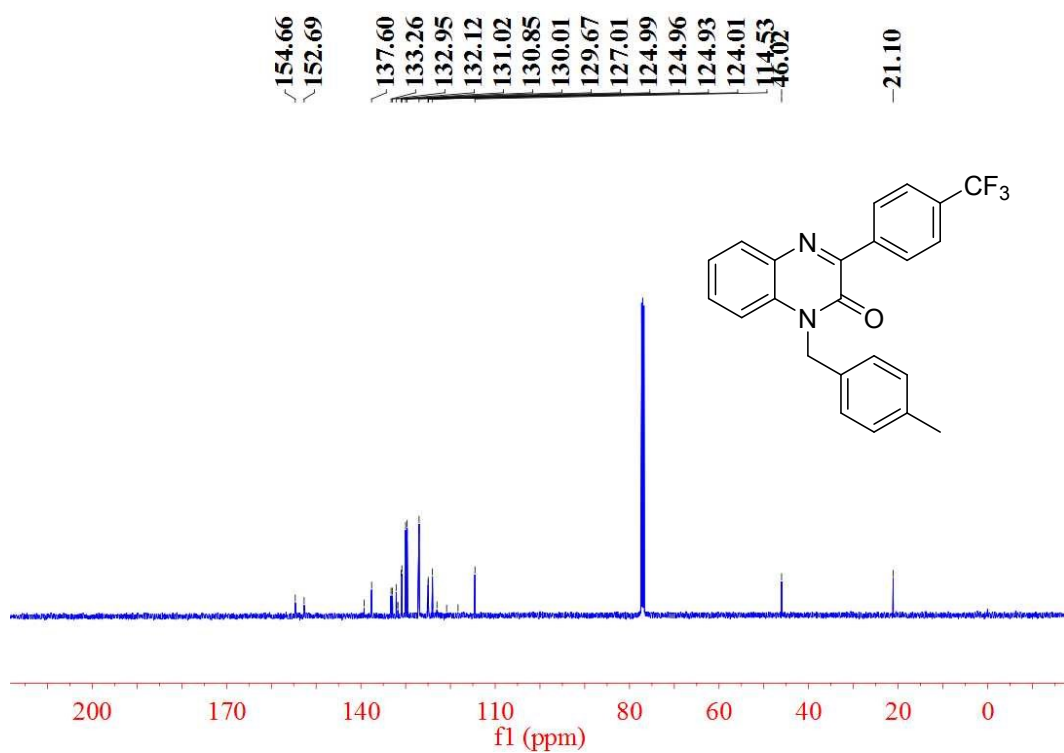

### 3bo <sup>1</sup>H NMR

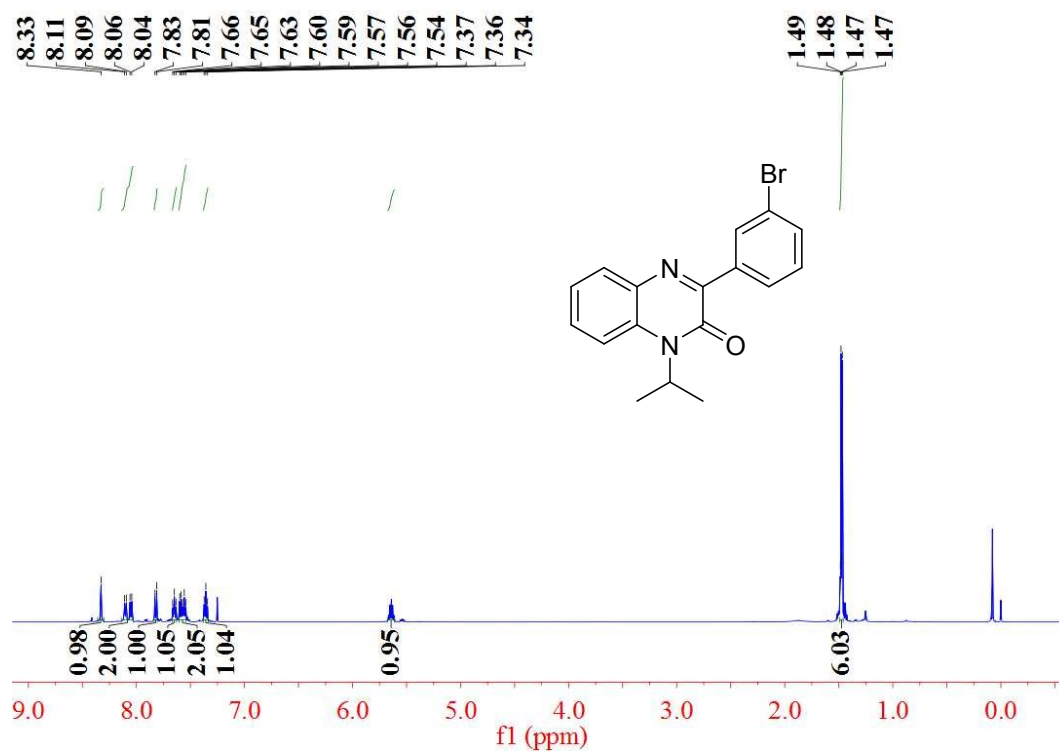

### 3bo <sup>13</sup>C NMR

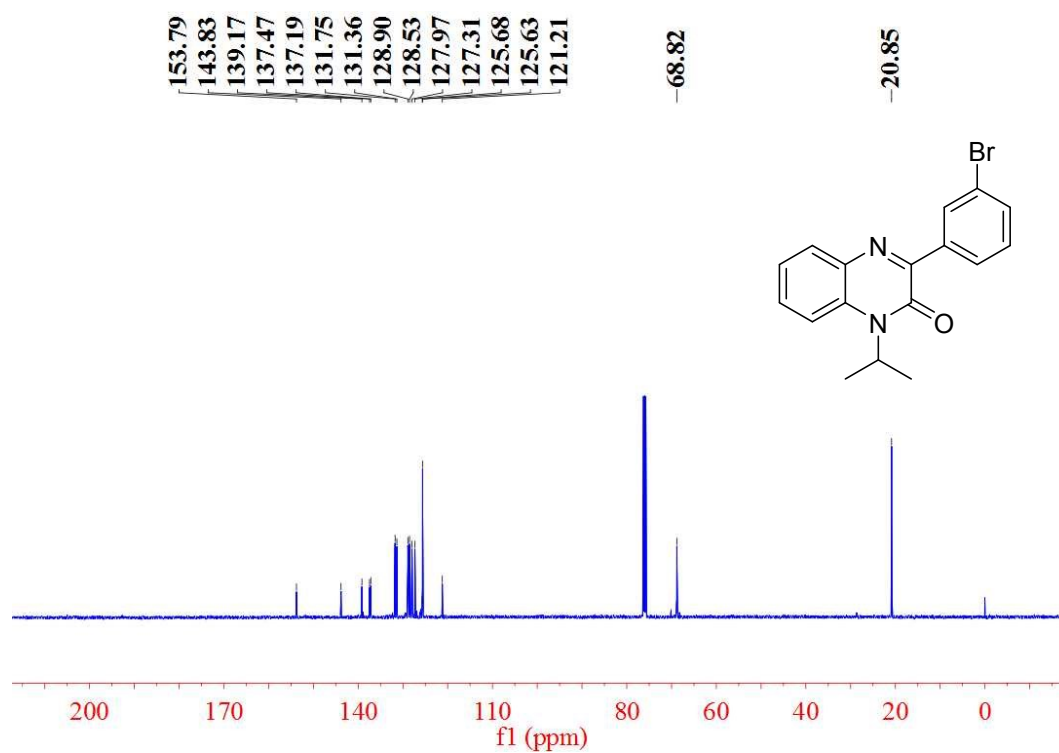

### 3bp <sup>1</sup>H NMR

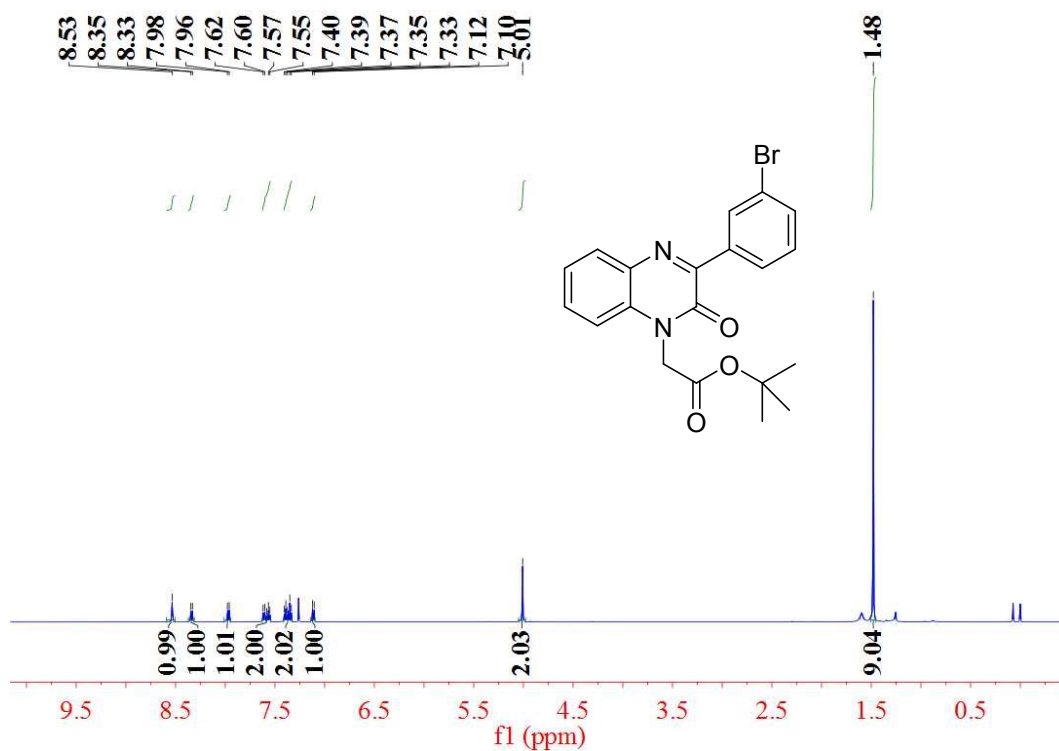

### 3bp <sup>13</sup>C NMR

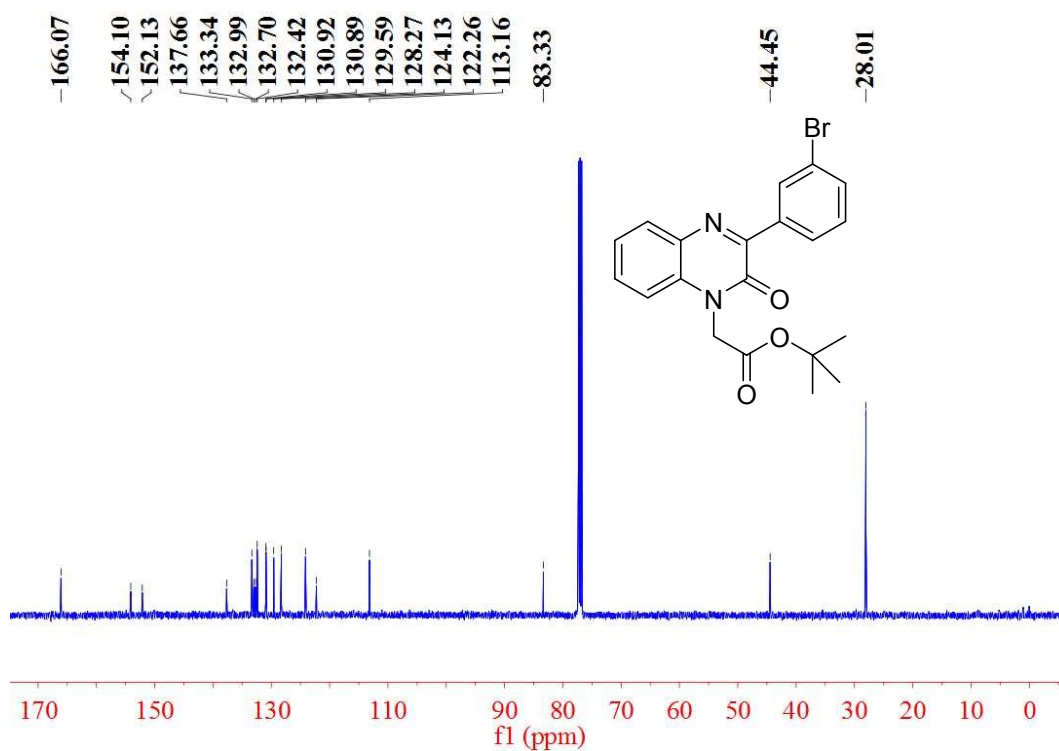

### 3bq <sup>1</sup>H NMR

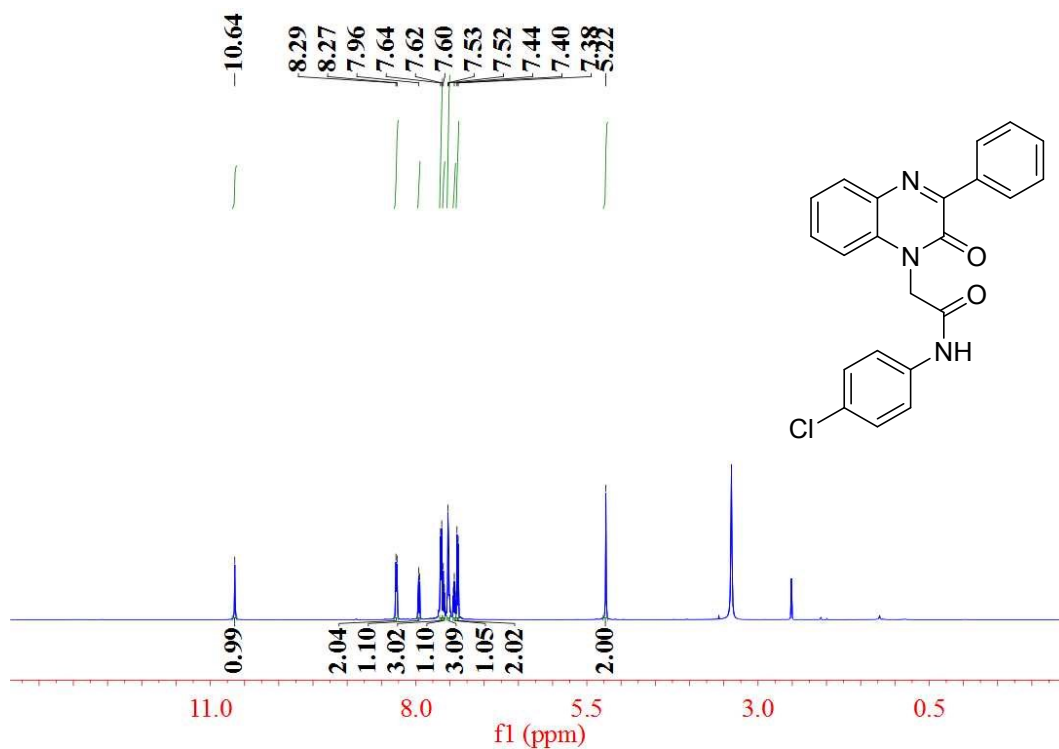

### 3bq <sup>13</sup>C NMR

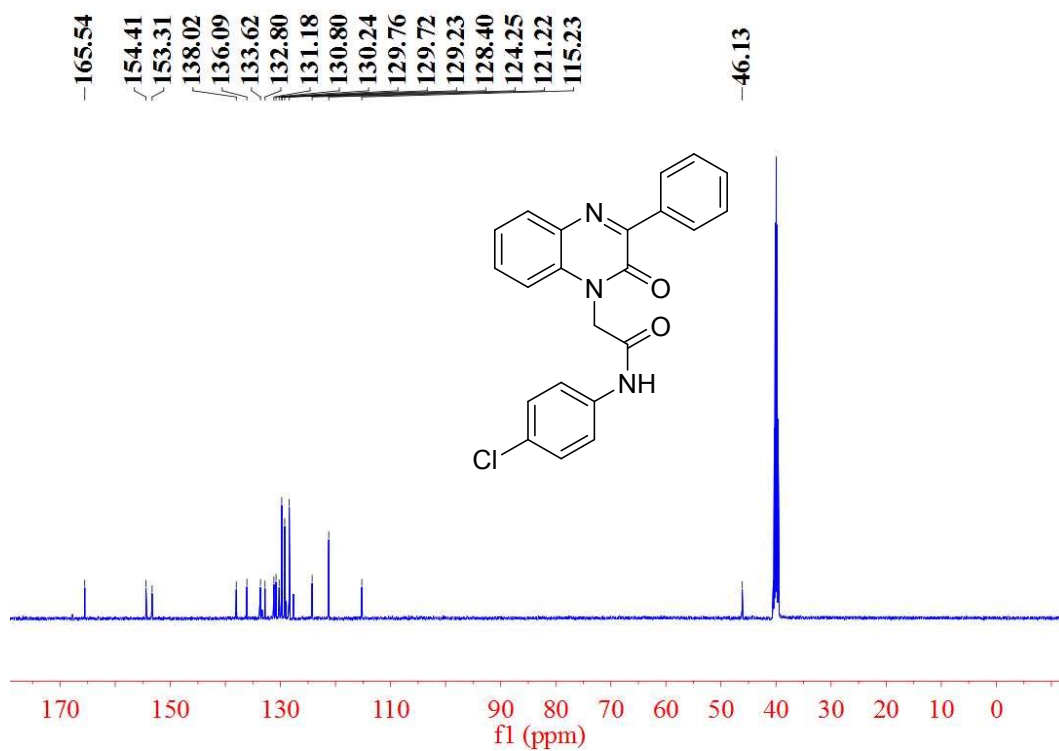

### $^1\text{H}$ NMR

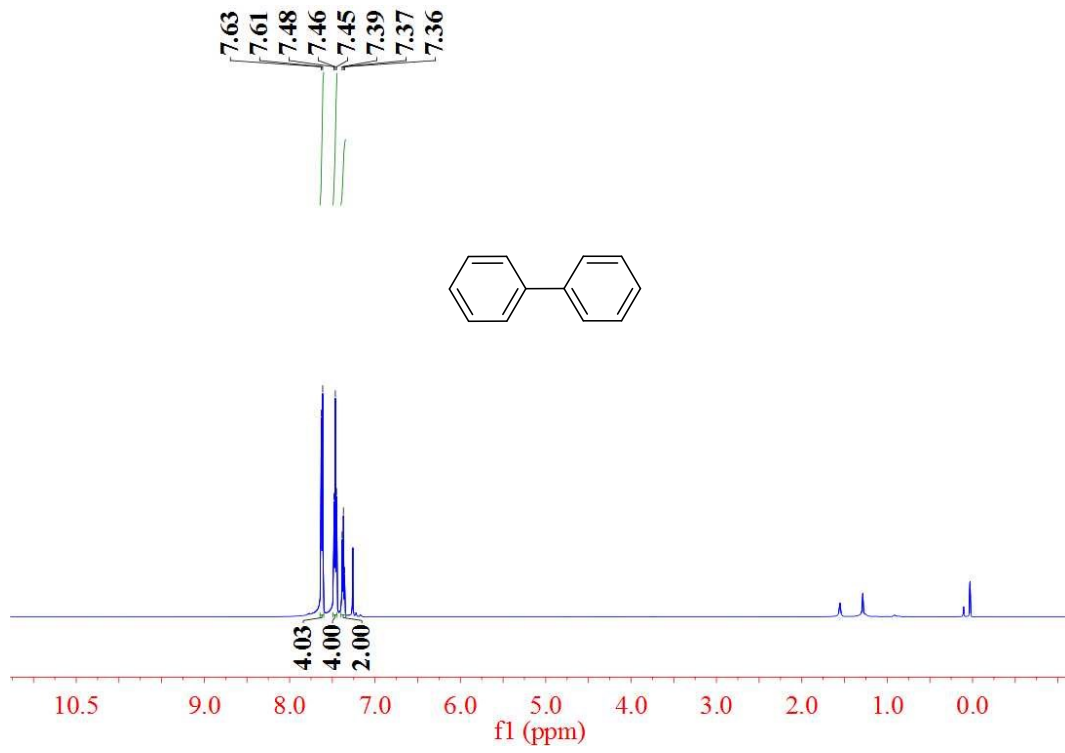

### $^{13}\text{C}$ NMR

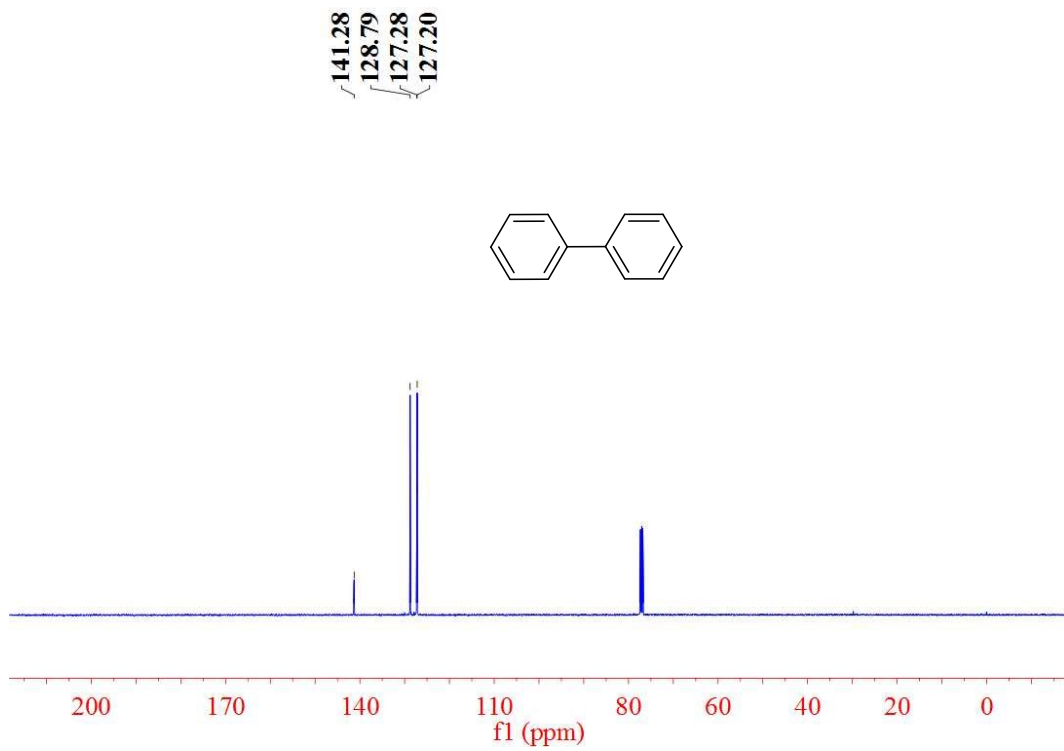

### 6. GC-MS spectra of benzoic acid

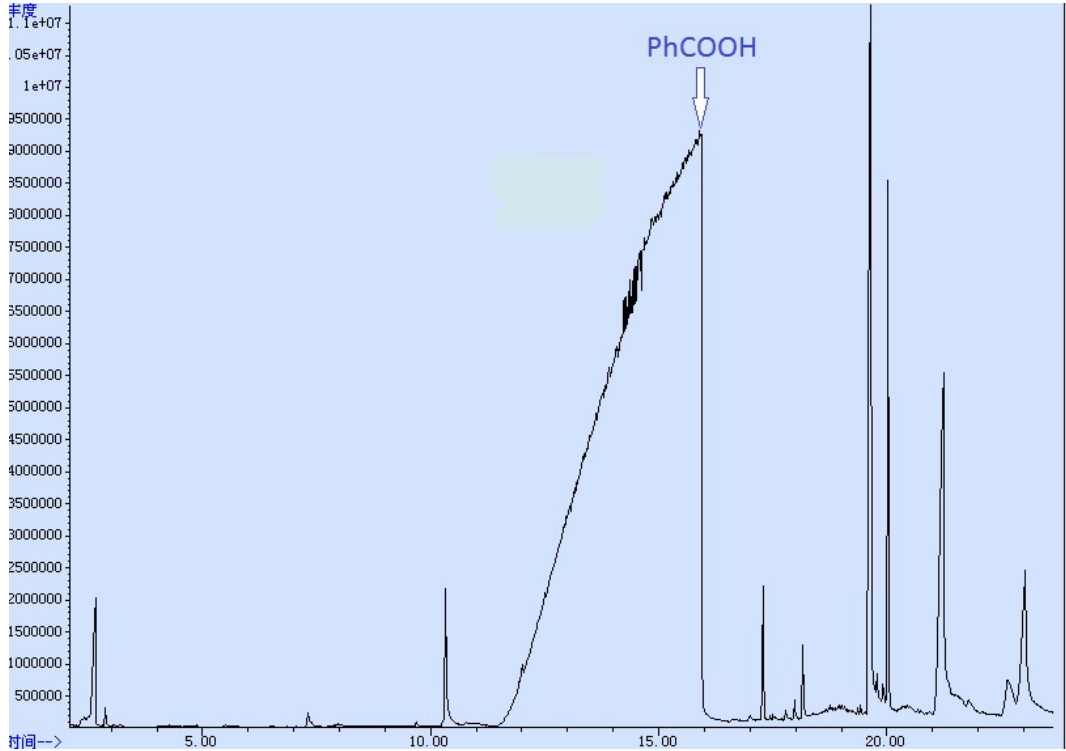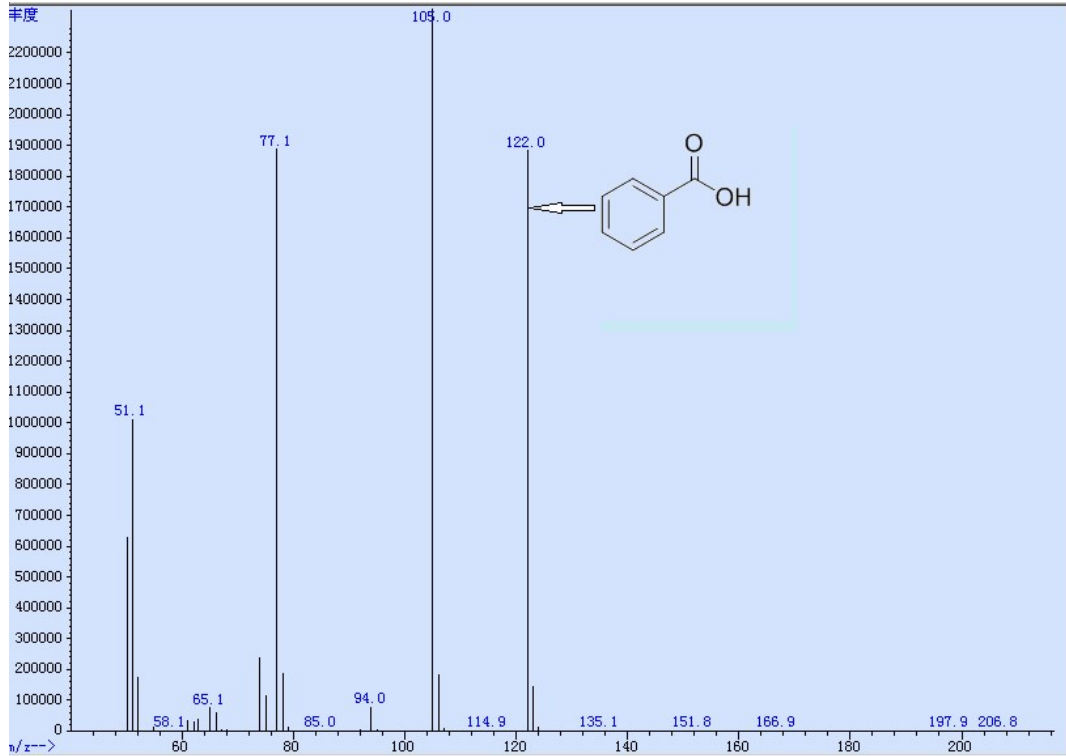

Supplement: d0qo00872a1.pdf [file d0qo00872a1.pdf]
